# Supplementary material for: Phosphotungstic acid as a novel acidic catalyst for carbohydrate protection and glycosylation
Source: PubMed Central journal article supplement (PMC9073715; doi:10.1039/c9ra06170c), 2019-10-21

**Supporting Information**

**Phosphotungstic acid as a novel acidic catalyst for carbohydrate  
protection and glycosylation**

Jyun-Siao Chen,<sup>a</sup> Arumugam Sankar,<sup>a</sup> Yi-Jyun Lin,<sup>a</sup> Po-Hsun Huang,<sup>a</sup> Chih-Hsiang  
Liao,<sup>b</sup> Shen-Shen Wu,<sup>c</sup> Hsin-Ru Wu,<sup>d</sup> Shun-Yuan Luo<sup>a\*</sup>

<sup>a</sup>Department of Chemistry, National Chung Hsing University, Taichung 402, Taiwan.

<sup>b</sup>Taichung Municipal Feng Yuan Senior High School, Taichung 420, Taiwan

<sup>c</sup>National Hsinchu Girls' Senior High School, Hsinchu 300, Taiwan.

<sup>d</sup>Instrumentation Center, MOST, National Tsing Hua University, Hsinchu 300, Taiwan.

E-mail: *syluo@dragon.nchu.edu.tw*

| <b>Contents</b>                     | <b>Page</b> |
|-------------------------------------|-------------|
| NMR spectrum of important compounds | 2-45        |

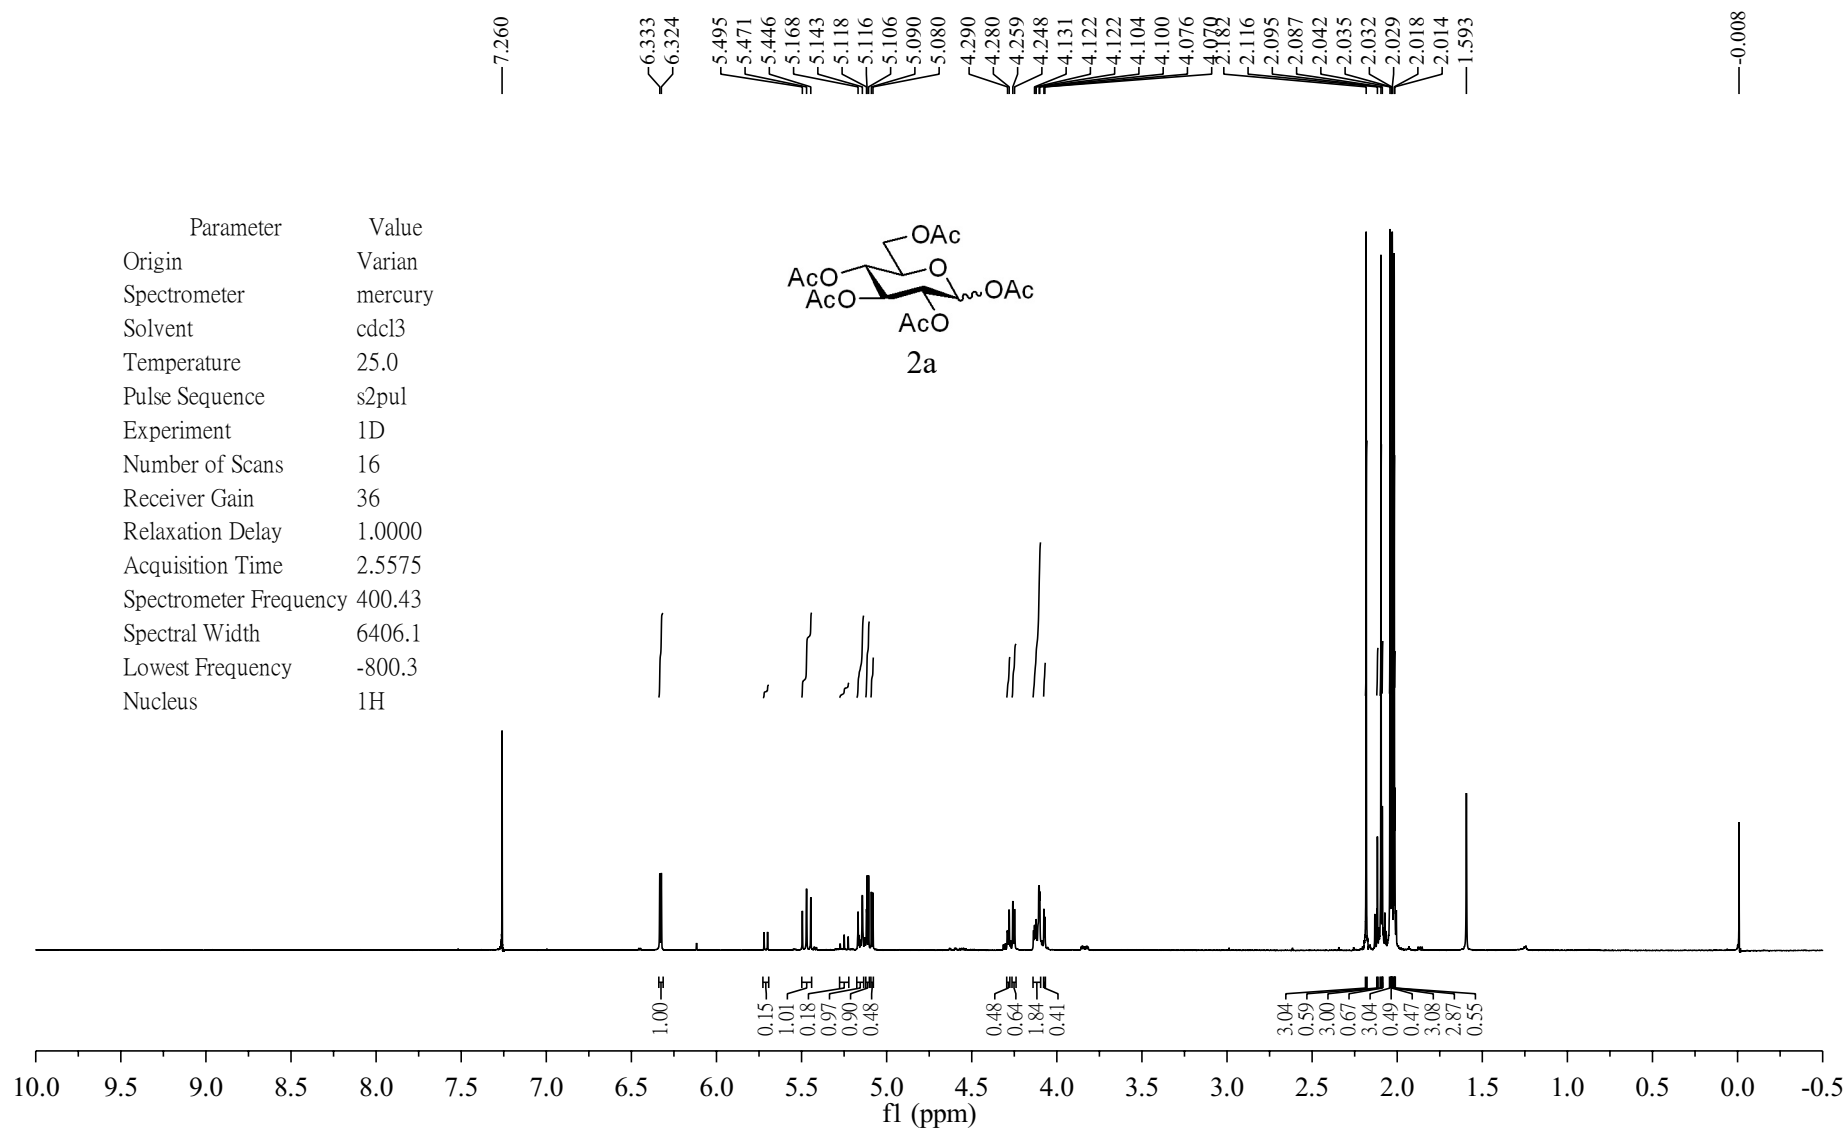

170.588  
170.182  
169.610  
169.348  
168.707

89.032

77.310  
76.992  
76.674  
69.793  
69.158  
67.857

61.423

20.846  
20.665  
20.633  
20.534  
20.415

| Parameter              | value   |
|------------------------|---------|
| Origin                 | Varian  |
| Spectrometer           | vmrs    |
| Solvent                | cdcl3   |
| Temperature            | 20.0    |
| Pulse Sequence         | s2pul   |
| Experiment             | 1D      |
| Number of Scans        | 216     |
| Receiver Gain          | 30      |
| Relaxation Delay       | 2.0000  |
| Acquisition Time       | 1.3107  |
| Spectrometer Frequency | 100.53  |
| Spectral Width         | 25000.0 |
| Lowest Frequency       | -1441.7 |
| Nucleus                | 13C     |

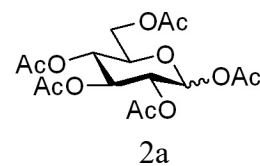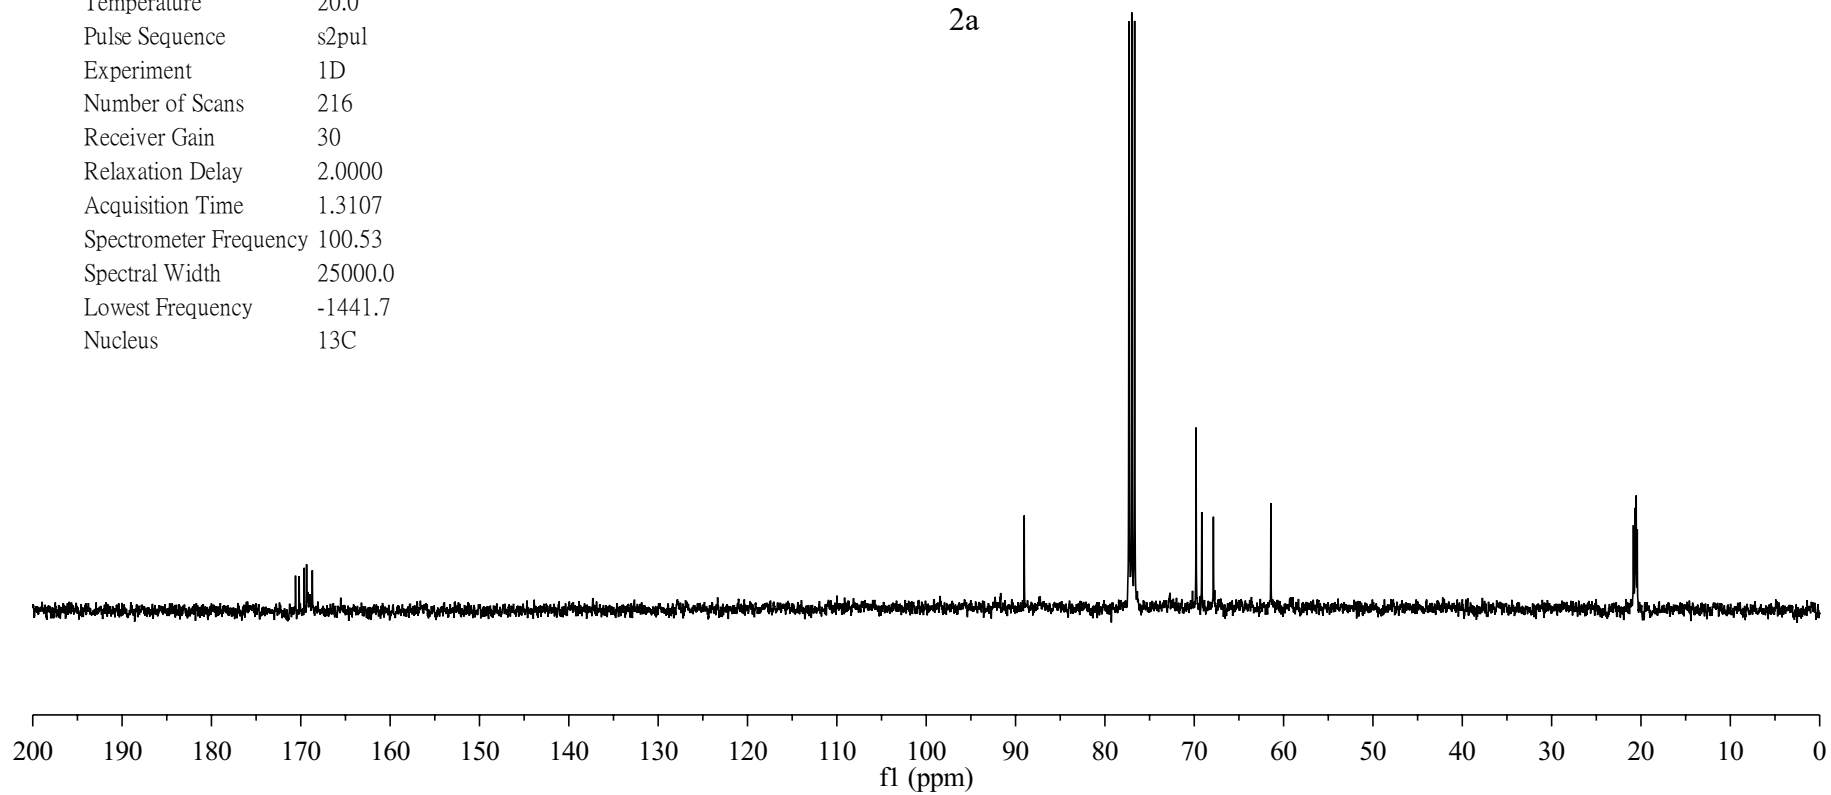

| Parameter              | Value          |
|------------------------|----------------|
| Origin                 | Varian         |
| Spectrometer           | mercury        |
| Solvent                | cdcl3          |
| Temperature            | 25.0           |
| Pulse Sequence         | s2pul          |
| Experiment             | 1D             |
| Number of Scans        | 20             |
| Receiver Gain          | 36             |
| Relaxation Delay       | 1.0000         |
| Acquisition Time       | 2.5575         |
| Spectrometer Frequency | 400.43         |
| Spectral Width         | 6406.1         |
| Lowest Frequency       | -800.3         |
| Nucleus                | <sup>1</sup> H |

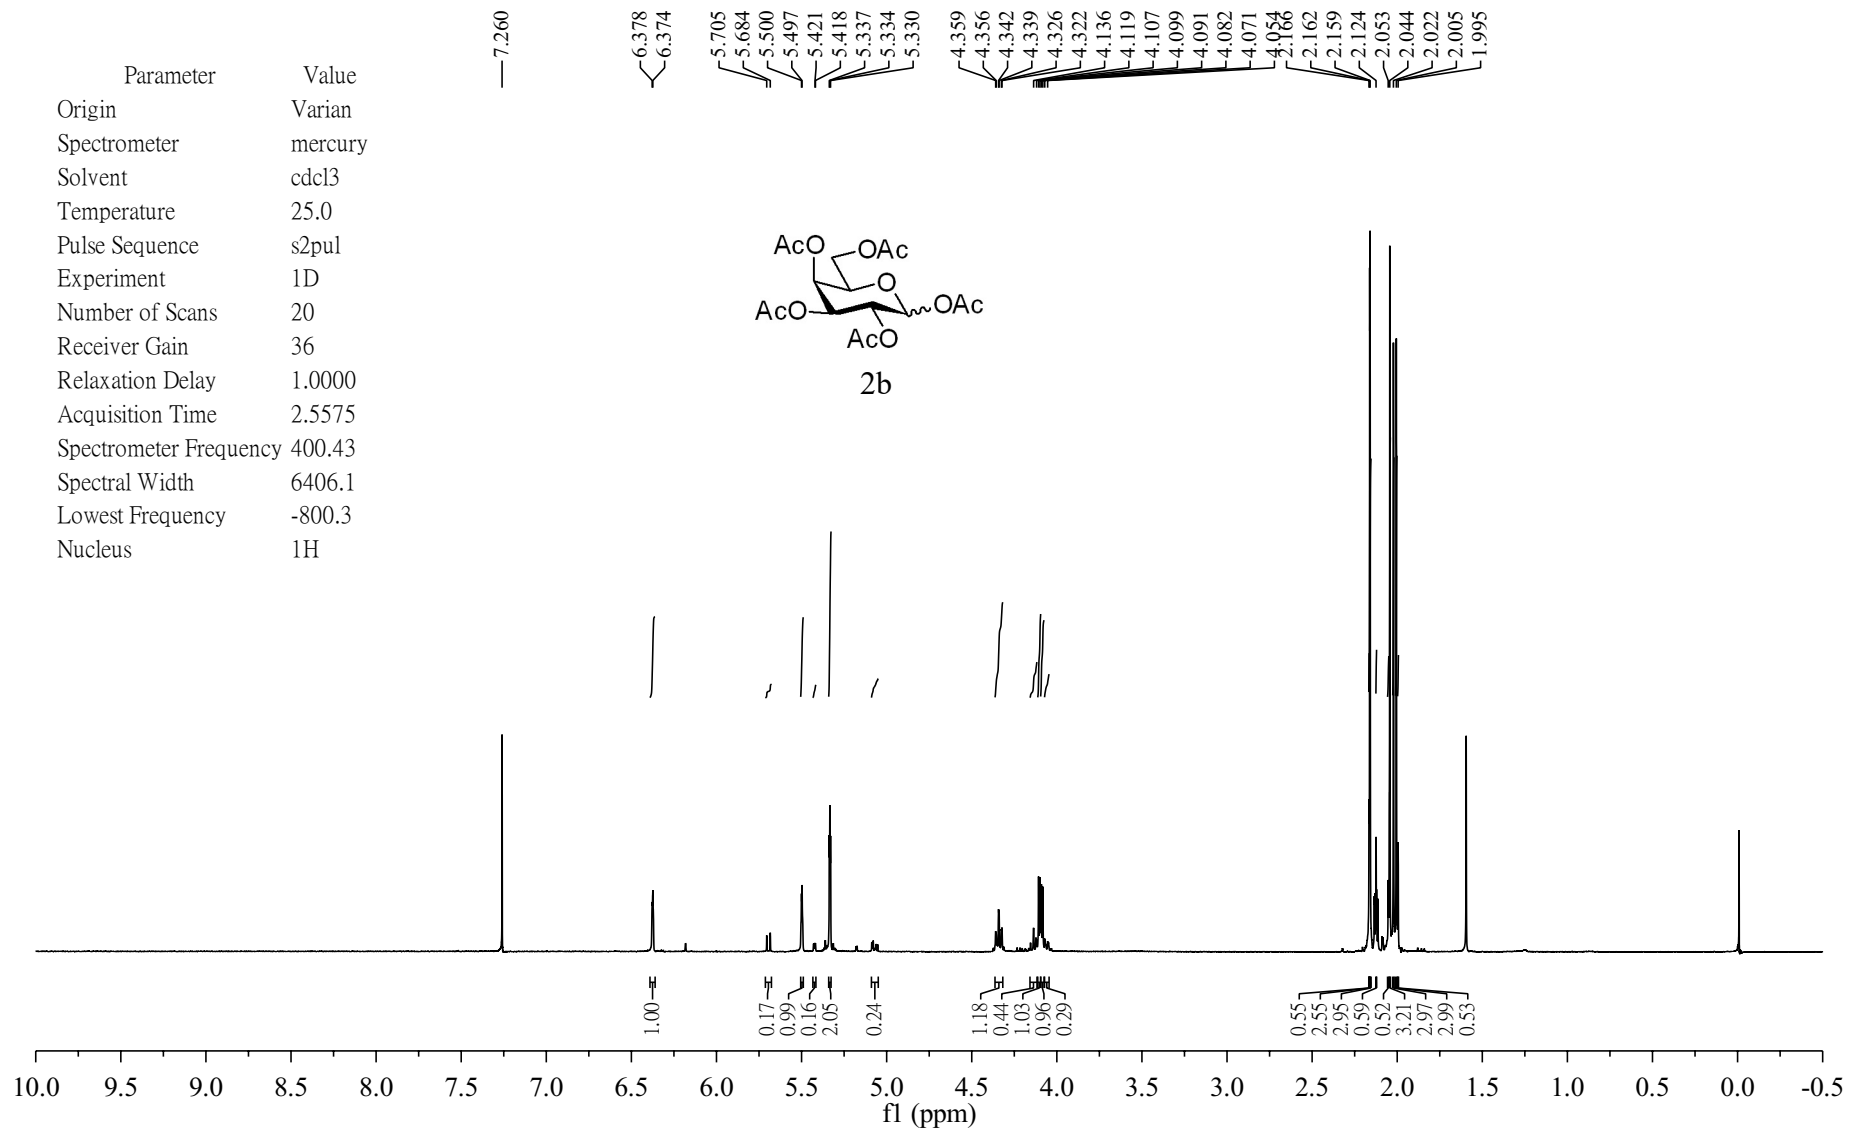

170.034  
169.849  
169.799  
169.579  
168.638

89.422

77.308  
76.989  
76.669  
68.499  
67.175  
67.101  
66.199  
60.984

20.589  
20.515  
20.352  
20.250

| Parameter              | value   |
|------------------------|---------|
| Origin                 | Varian  |
| Spectrometer           | nmrs    |
| Solvent                | cdcl3   |
| Temperature            | 20.0    |
| Pulse Sequence         | s2pul   |
| Experiment             | 1D      |
| Number of Scans        | 176     |
| Receiver Gain          | 30      |
| Relaxation Delay       | 2.0000  |
| Acquisition Time       | 1.3107  |
| Spectrometer Frequency | 100.53  |
| Spectral Width         | 25000.0 |
| Lowest Frequency       | -1455.5 |
| Nucleus                | 13C     |

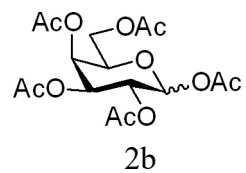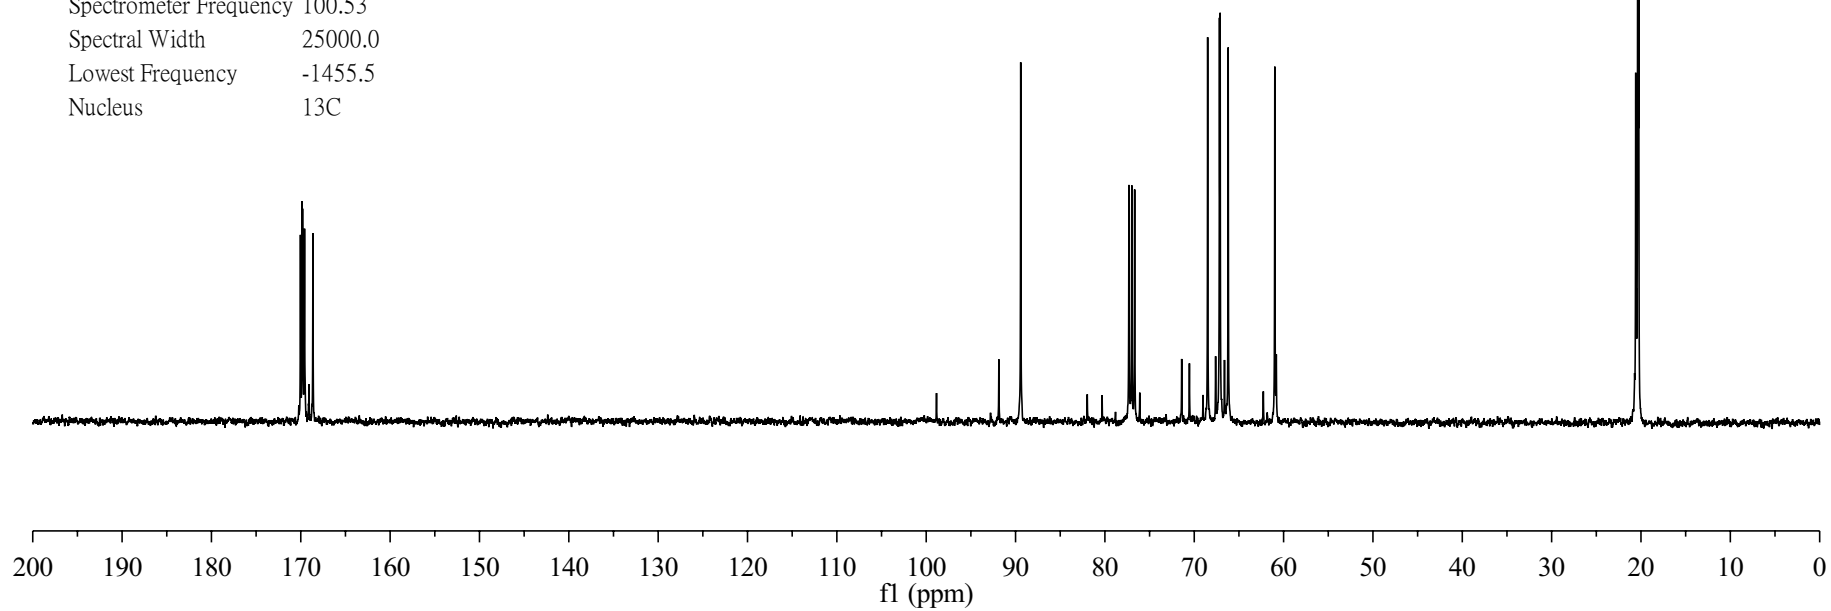

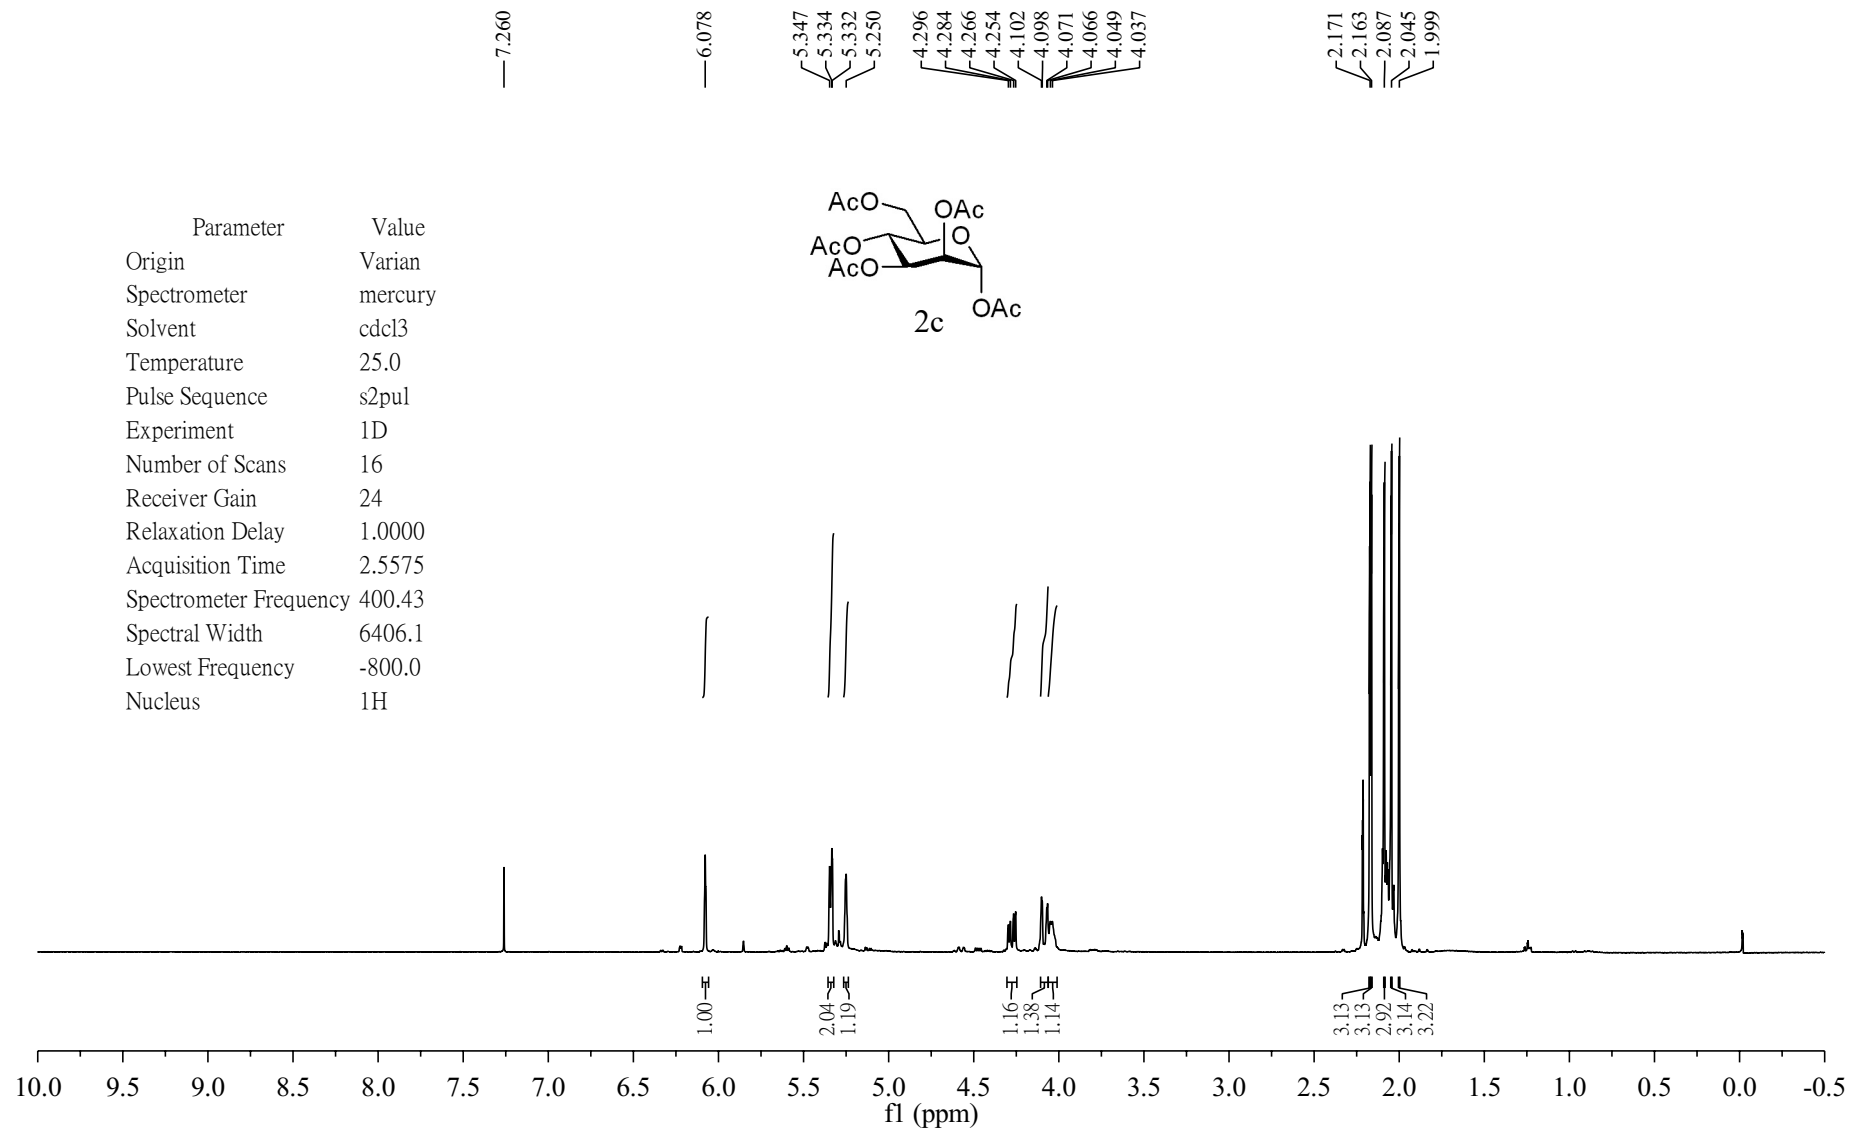

| Parameter              | Value          |
|------------------------|----------------|
| Origin                 | Varian         |
| Spectrometer           | mercury        |
| Solvent                | cdcl3          |
| Temperature            | 25.0           |
| Pulse Sequence         | s2pul          |
| Experiment             | 1D             |
| Number of Scans        | 16             |
| Receiver Gain          | 24             |
| Relaxation Delay       | 1.0000         |
| Acquisition Time       | 2.5575         |
| Spectrometer Frequency | 400.43         |
| Spectral Width         | 6406.1         |
| Lowest Frequency       | -800.0         |
| Nucleus                | <sup>1</sup> H |

170.329  
169.672  
169.433  
169.266  
167.797

90.248

77.319  
77.000  
76.679  
70.246  
68.447  
68.010  
65.195  
61.767

20.474  
20.382  
20.329  
20.286  
20.259

| Parameter              | value   |
|------------------------|---------|
| Origin                 | Varian  |
| Spectrometer           | vnmrs   |
| Solvent                | cdcl3   |
| Temperature            | 20.0    |
| Pulse Sequence         | s2pul   |
| Experiment             | 1D      |
| Number of Scans        | 144     |
| Receiver Gain          | 30      |
| Relaxation Delay       | 2.0000  |
| Acquisition Time       | 1.3107  |
| Spectrometer Frequency | 100.53  |
| Spectral Width         | 25000.0 |
| Lowest Frequency       | -1459.3 |
| Nucleus                | 13C     |

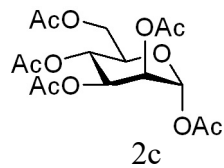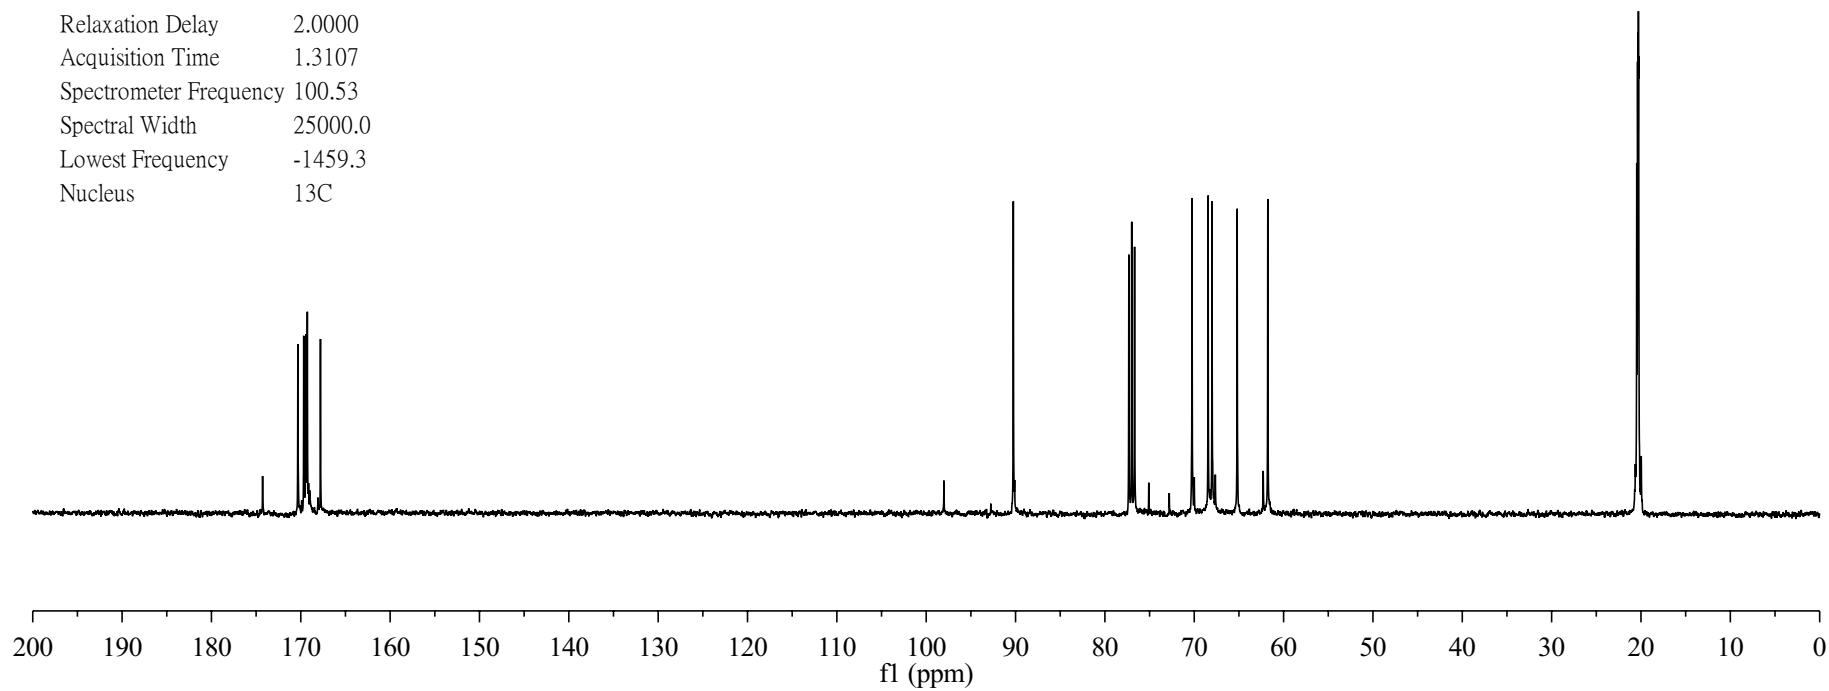

| Parameter              | Value          |
|------------------------|----------------|
| Origin                 | Varian         |
| Spectrometer           | mercury        |
| Solvent                | cdcl3          |
| Temperature            | 25.0           |
| Pulse Sequence         | s2pul          |
| Experiment             | 1D             |
| Number of Scans        | 16             |
| Receiver Gain          | 30             |
| Relaxation Delay       | 1.0000         |
| Acquisition Time       | 2.5575         |
| Spectrometer Frequency | 400.43         |
| Spectral Width         | 6406.1         |
| Lowest Frequency       | -800.0         |
| Nucleus                | <sup>1</sup> H |

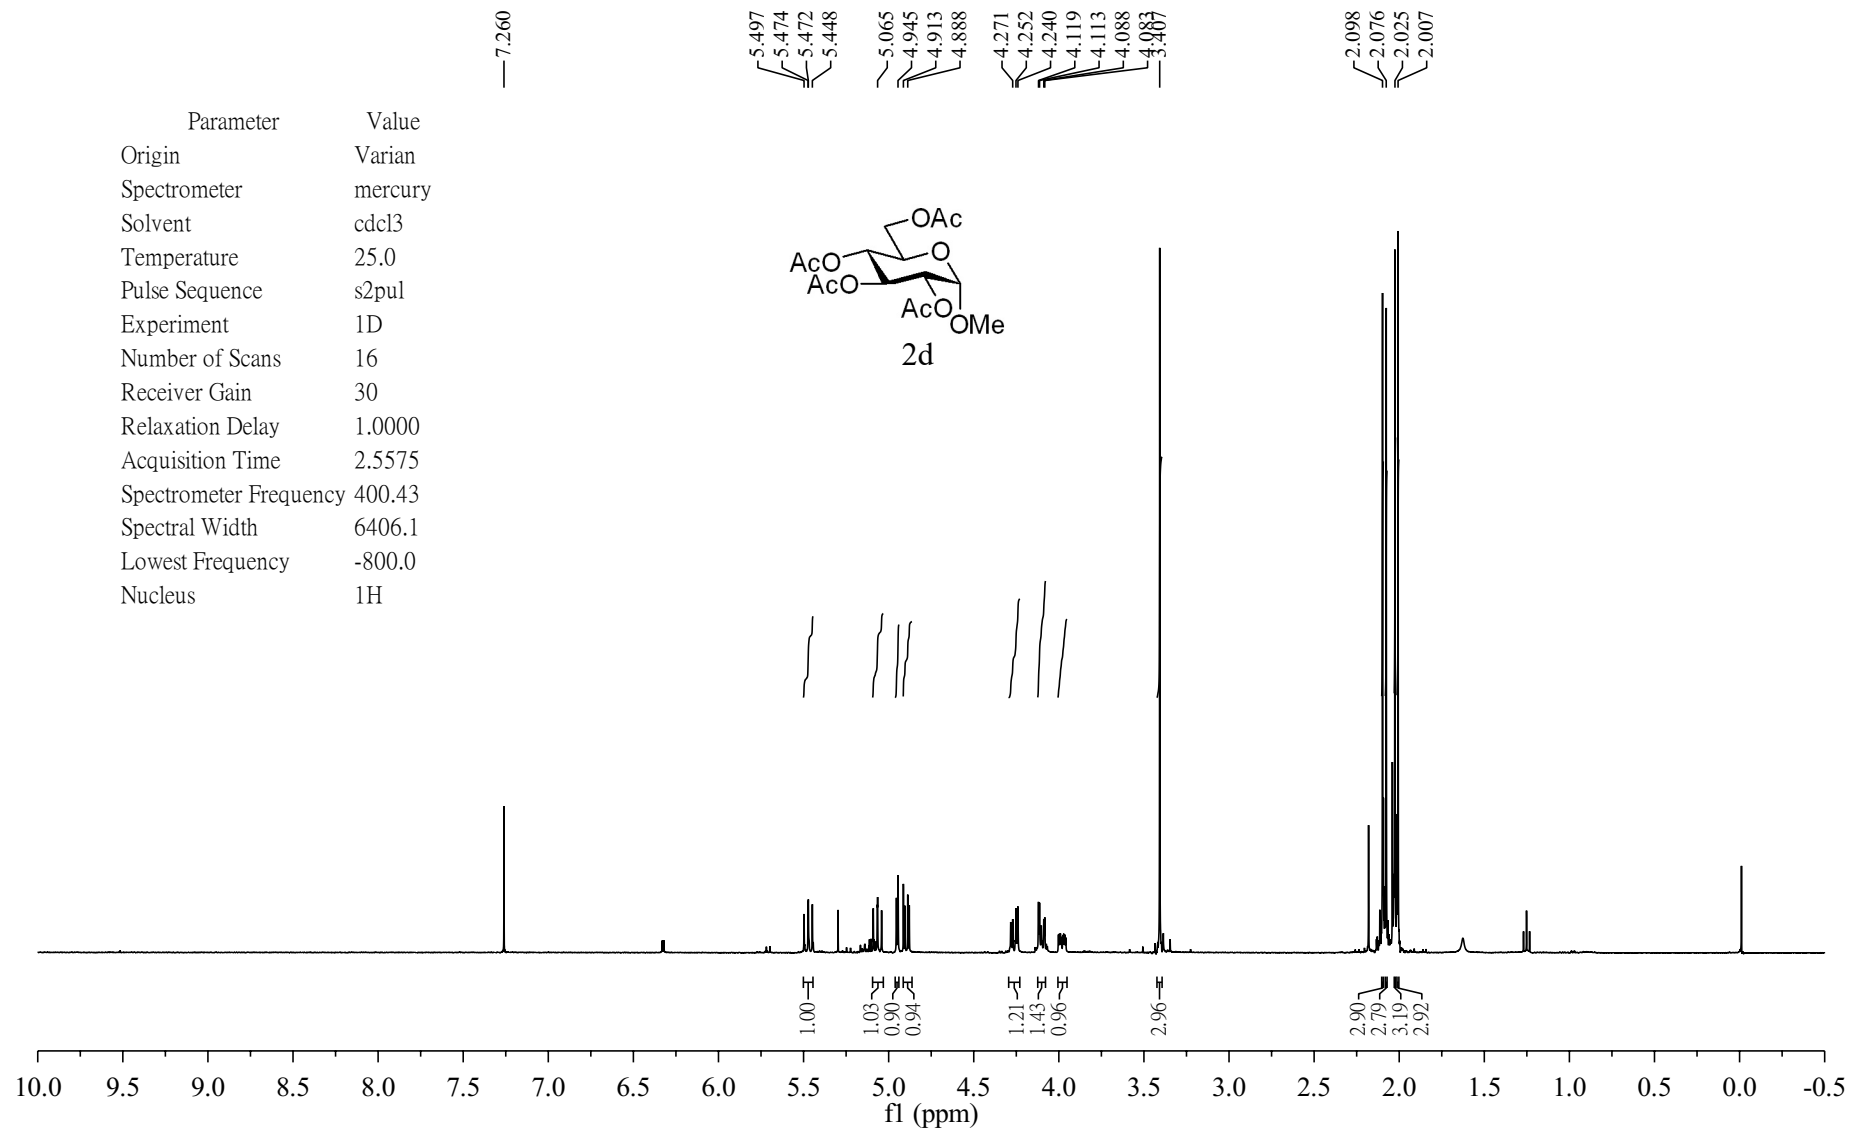



170.414  
169.897  
169.831  
169.377

96.570

77.319  
77.000  
76.681  
70.571  
69.902  
68.334  
66.941  
61.725  
55.248

20.498  
20.459  
20.399

| Parameter              | value   |
|------------------------|---------|
| Origin                 | Varian  |
| Spectrometer           | vnmrs   |
| Solvent                | cdcl3   |
| Temperature            | 20.0    |
| Pulse Sequence         | s2pul   |
| Experiment             | 1D      |
| Number of Scans        | 168     |
| Receiver Gain          | 30      |
| Relaxation Delay       | 2.0000  |
| Acquisition Time       | 1.3107  |
| Spectrometer Frequency | 100.53  |
| Spectral Width         | 25000.0 |
| Lowest Frequency       | -1451.3 |
| Nucleus                | 13C     |

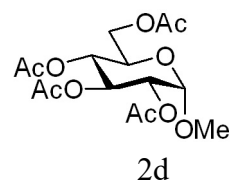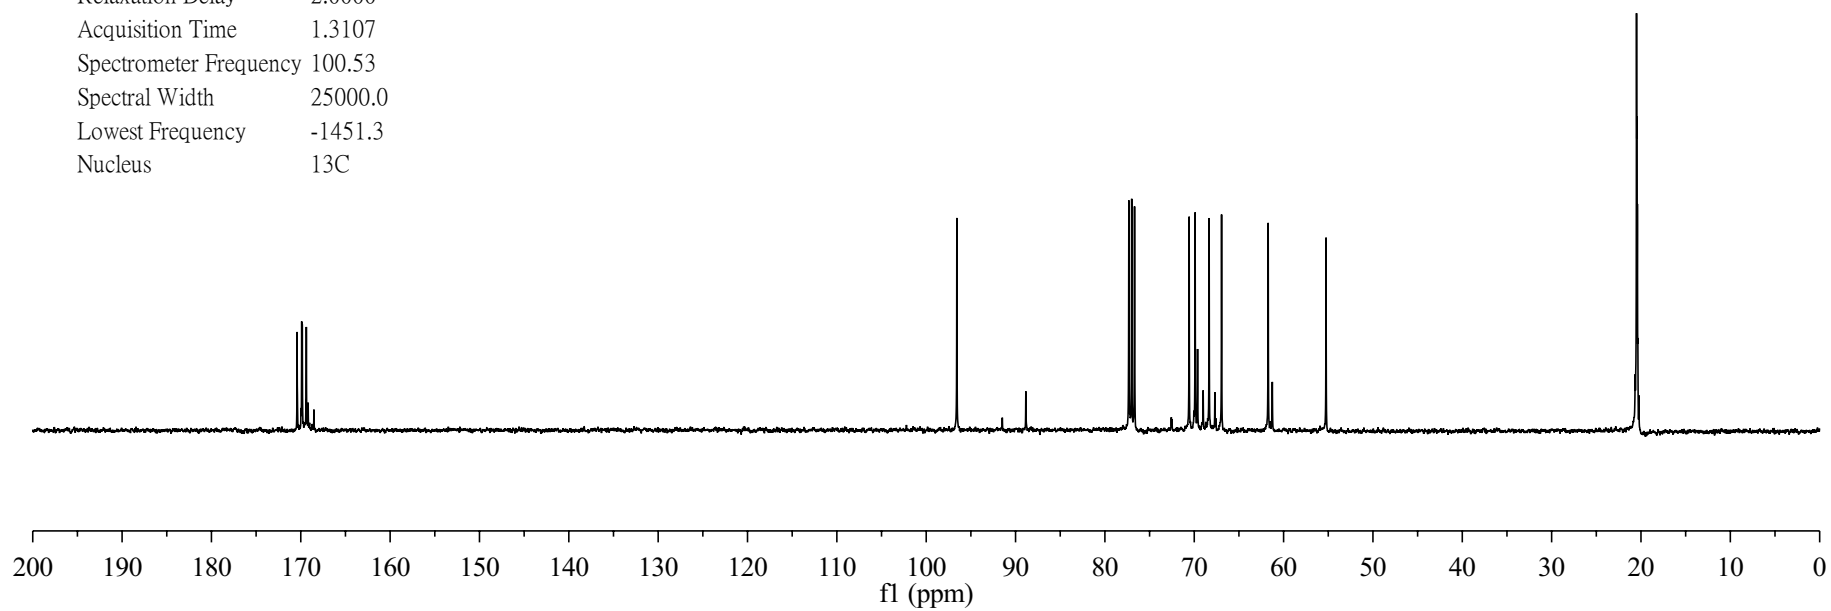

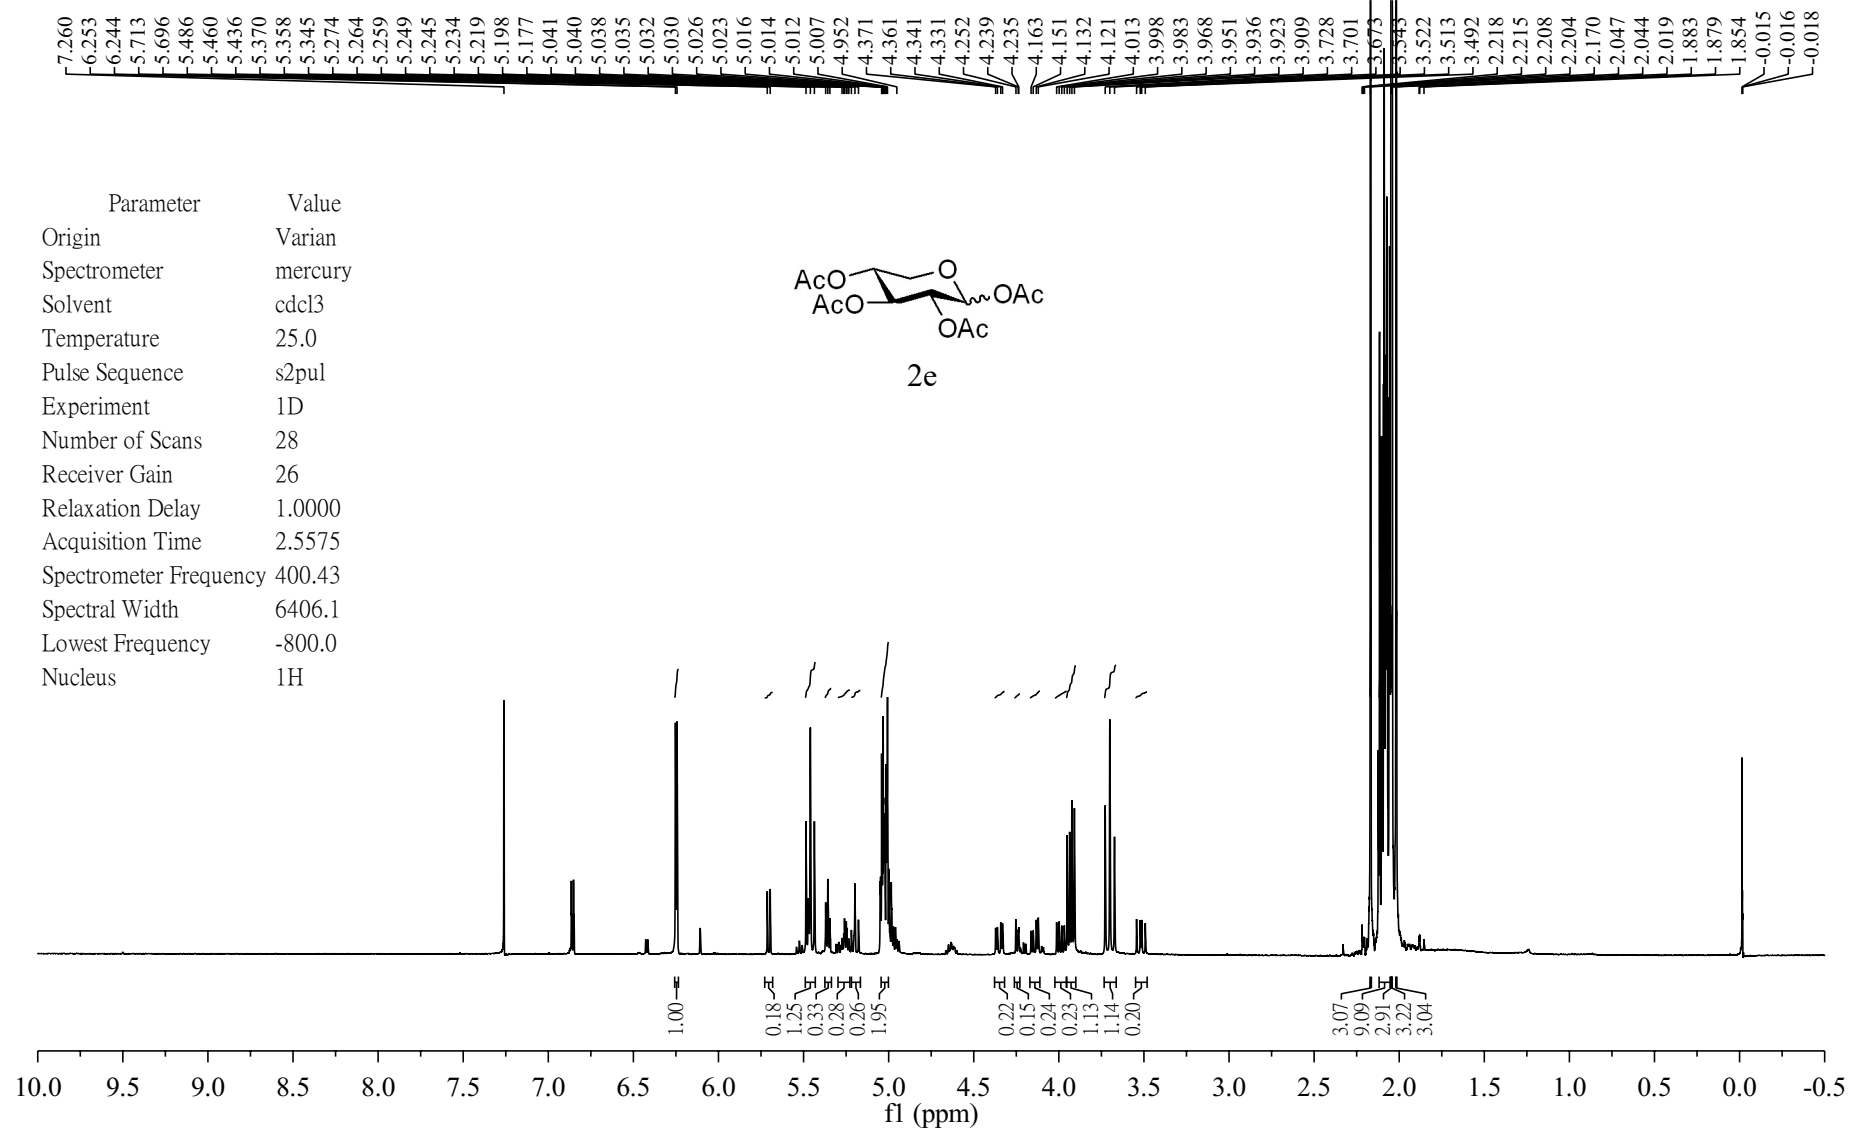

170.023  
169.666  
169.628  
168.920

89.081

77.319  
77.000  
76.682  
69.187  
69.161  
68.516

60.494

20.766  
20.626  
20.563  
20.390

| Parameter              | value           |
|------------------------|-----------------|
| Origin                 | Varian          |
| Spectrometer           | vnmrs           |
| Solvent                | cdcl3           |
| Temperature            | 20.0            |
| Pulse Sequence         | s2pul           |
| Experiment             | 1D              |
| Number of Scans        | 96              |
| Receiver Gain          | 30              |
| Relaxation Delay       | 2.0000          |
| Acquisition Time       | 1.3107          |
| Spectrometer Frequency | 100.53          |
| Spectral Width         | 25000.0         |
| Lowest Frequency       | -1449.0         |
| Nucleus                | <sup>13</sup> C |

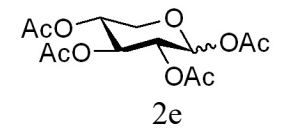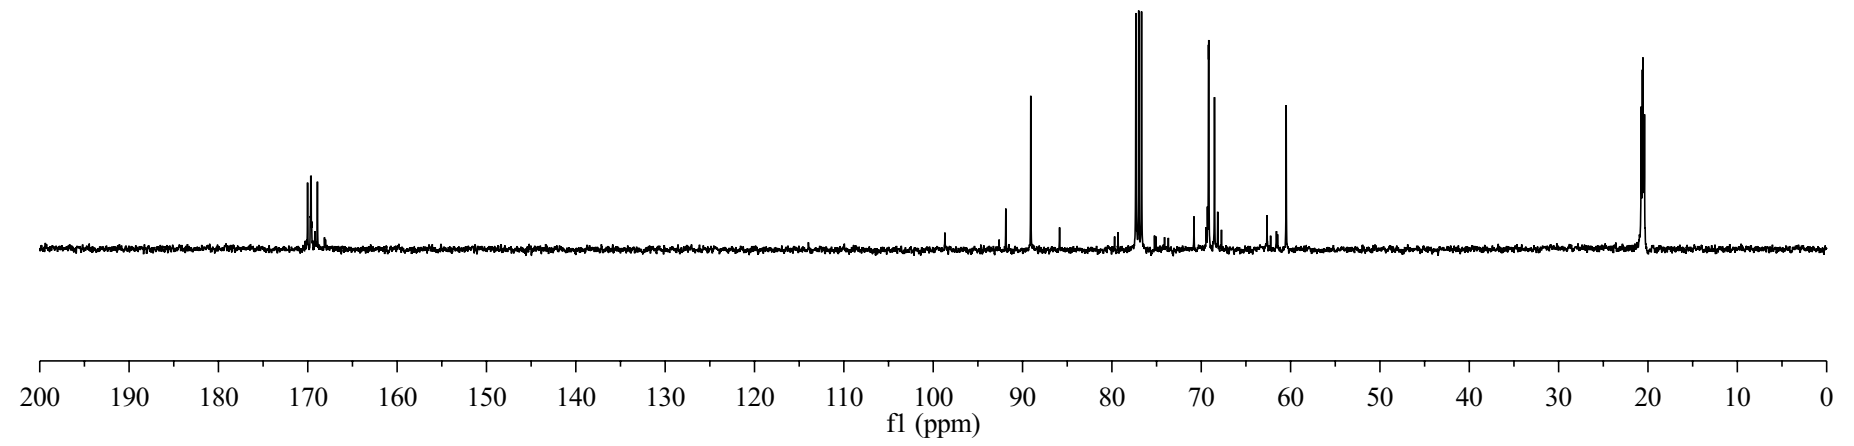

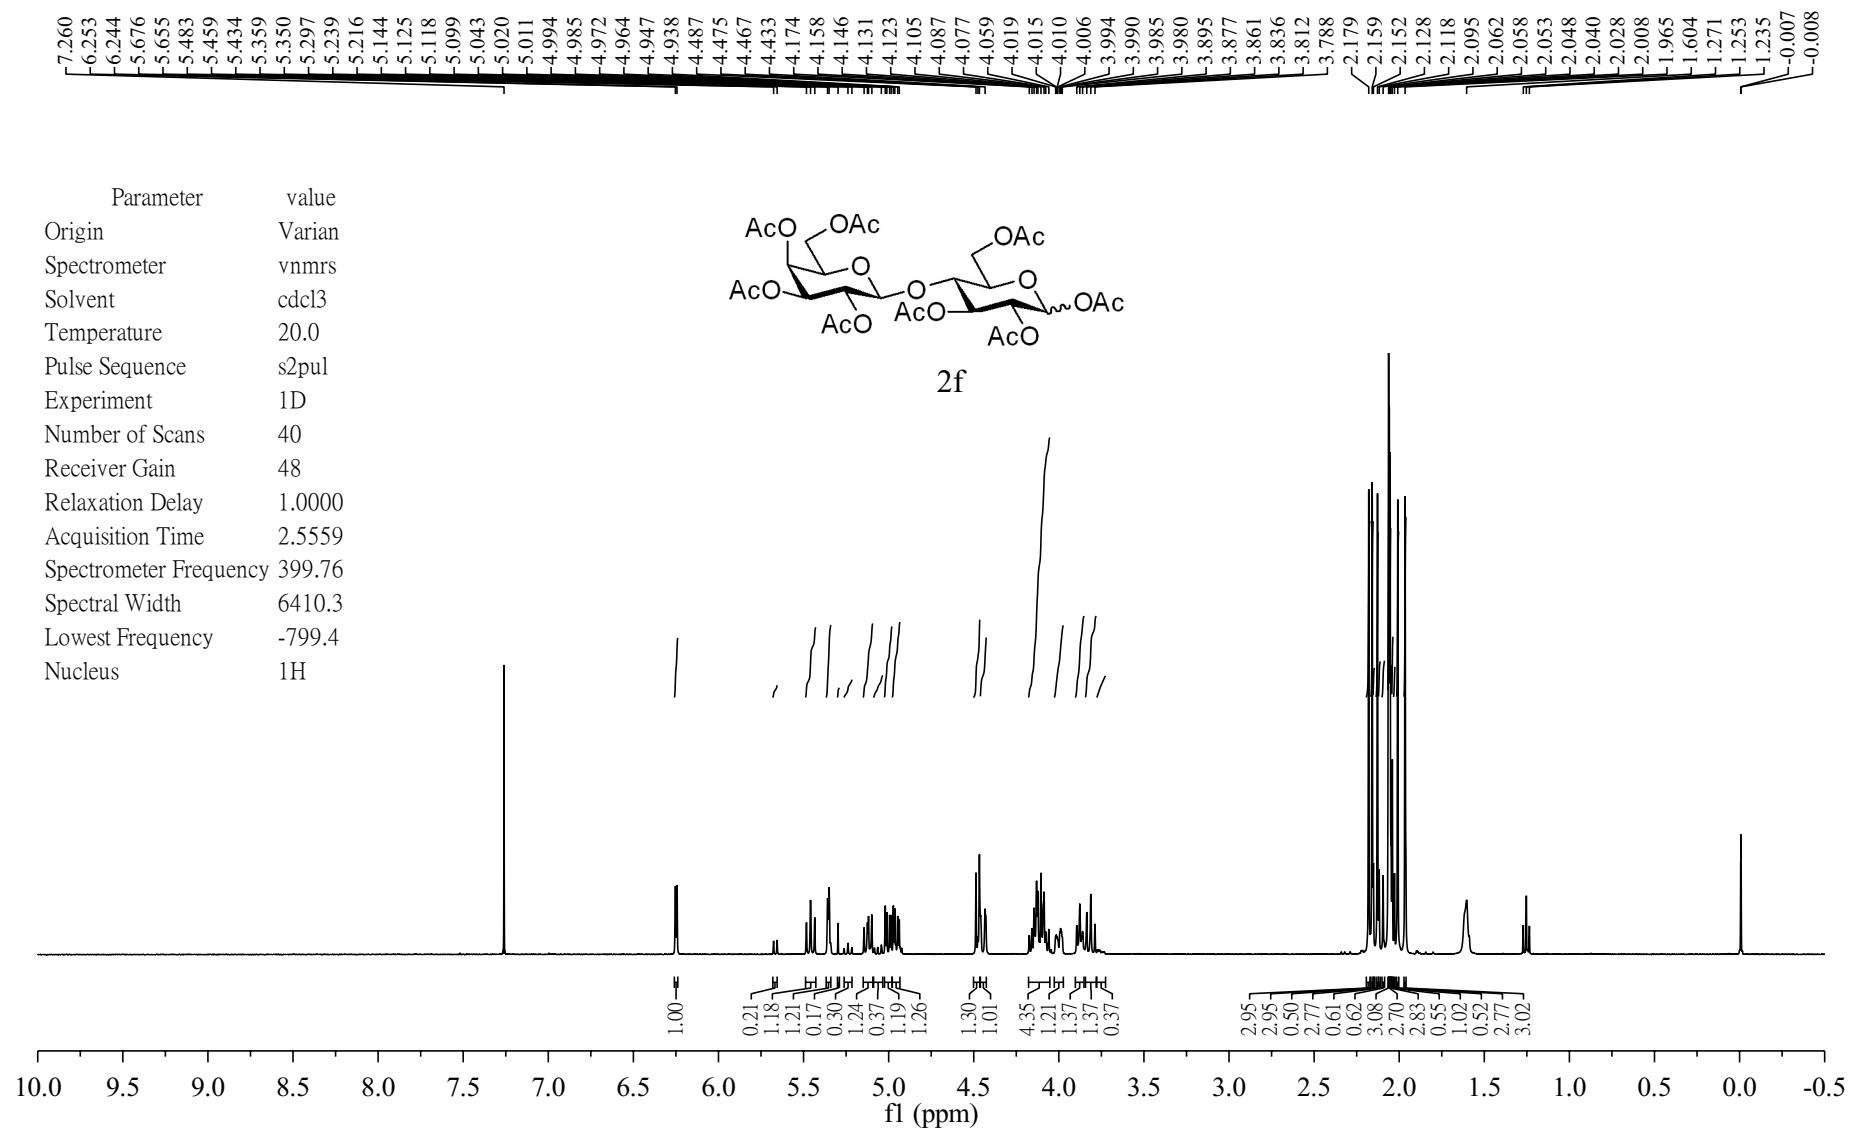

170.284  
170.243  
170.080  
170.006  
169.874  
169.555  
169.073  
168.877

101.132

88.869

77.313  
76.995  
76.676  
75.725  
70.913  
70.611  
69.495  
68.489  
60.701

20.906  
20.798  
20.606  
20.456

| Parameter              | value   |
|------------------------|---------|
| Origin                 | Varian  |
| Spectrometer           | nmrs    |
| Solvent                | cdcl3   |
| Temperature            | 20.0    |
| Pulse Sequence         | s2pul   |
| Experiment             | 1D      |
| Number of Scans        | 248     |
| Receiver Gain          | 30      |
| Relaxation Delay       | 2.0000  |
| Acquisition Time       | 1.3107  |
| Spectrometer Frequency | 100.53  |
| Spectral Width         | 25000.0 |
| Lowest Frequency       | -1445.9 |
| Nucleus                | 13C     |

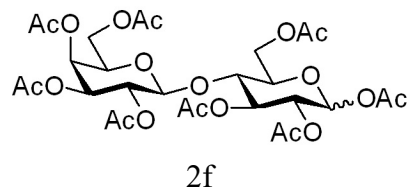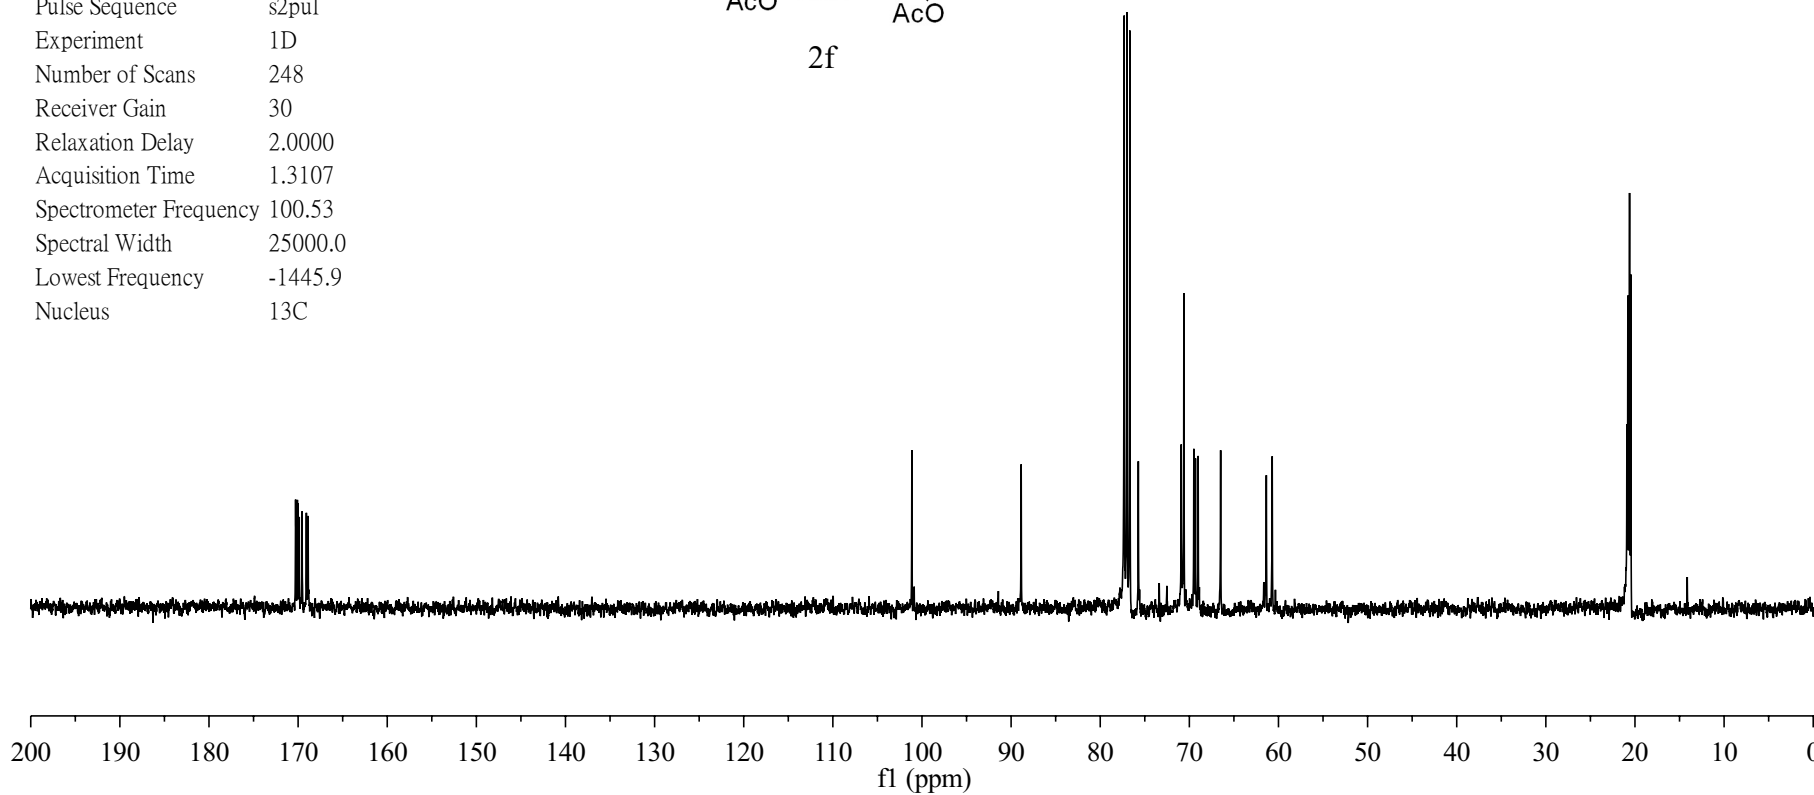

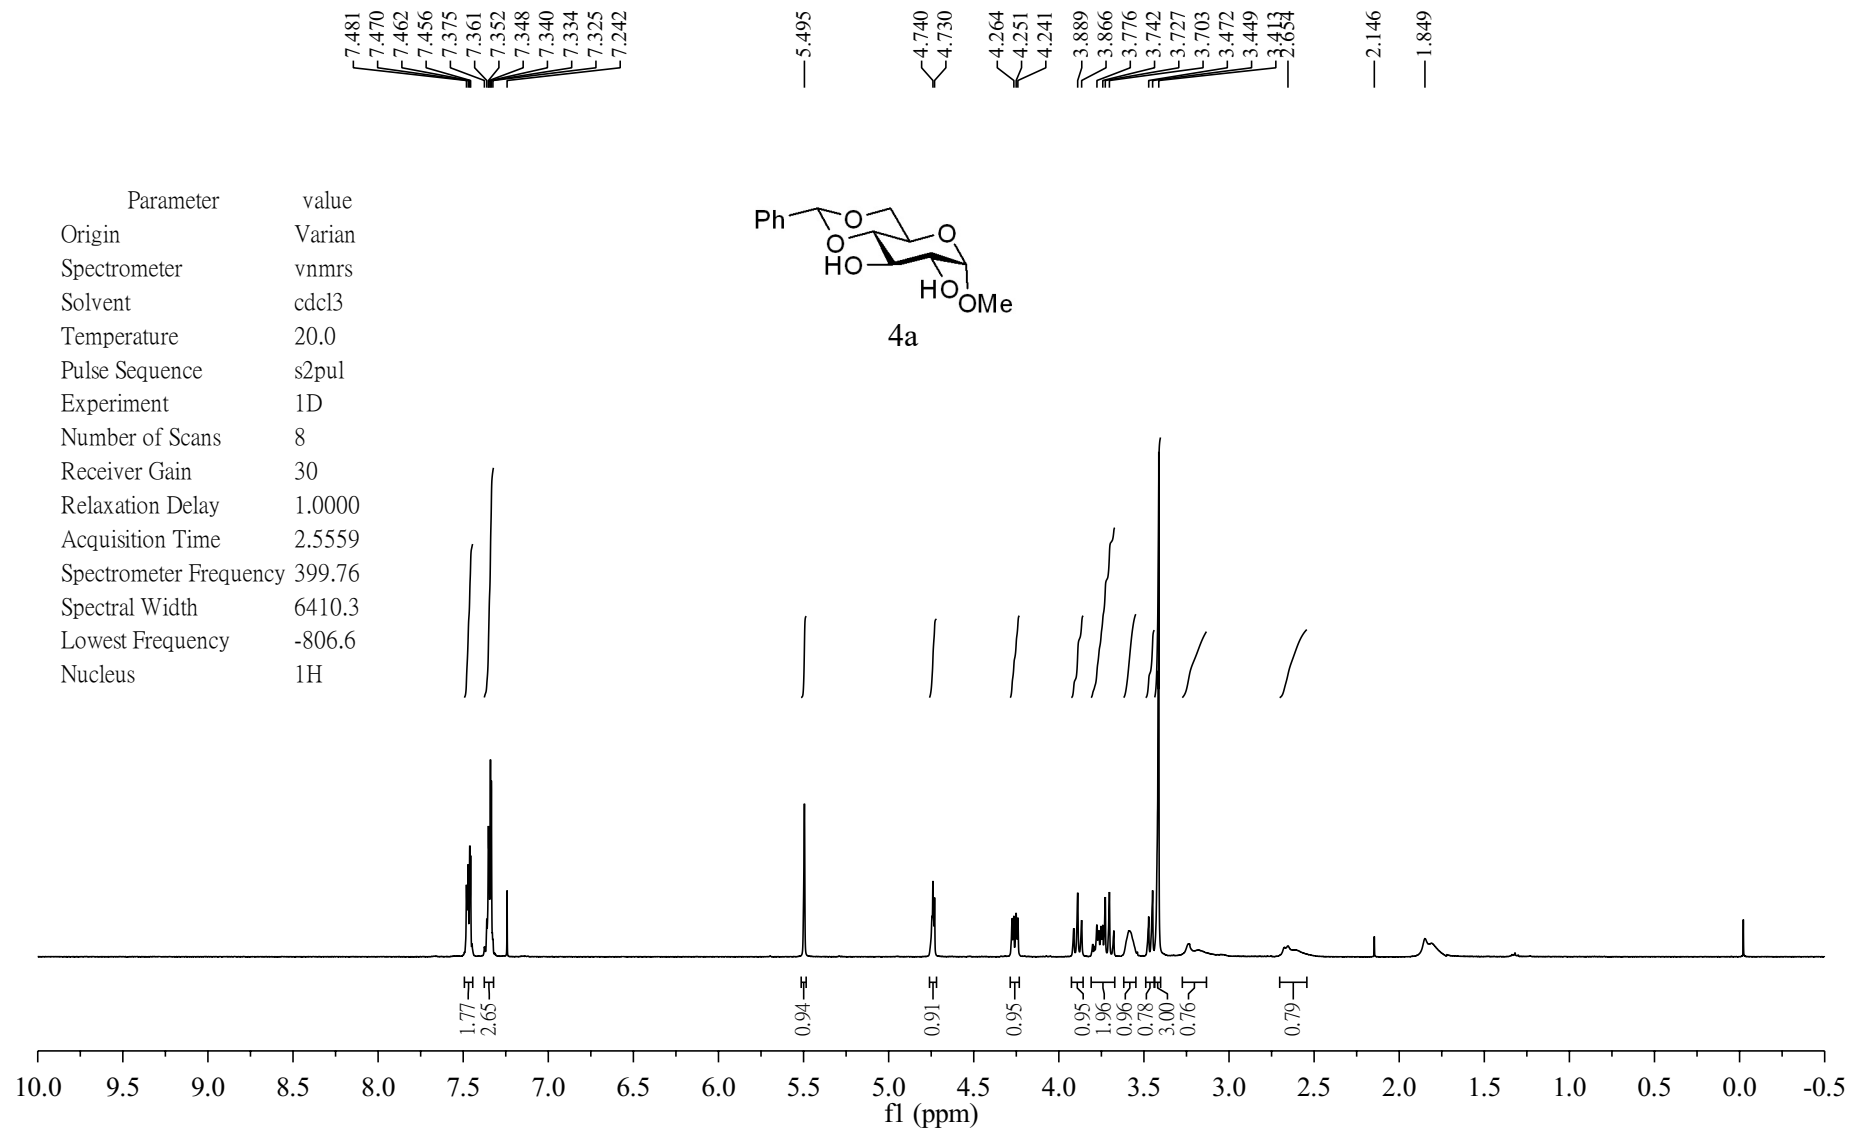

137.261  
 129.548  
 128.613  
 126.578  
 102.194  
 100.048  
 81.177  
 77.629  
 77.311  
 76.993  
 73.053  
 71.832  
 69.183  
 62.802  
 55.825

| Parameters                |         |
|---------------------------|---------|
| Parameter                 | Value   |
| 1 Origin                  | Varian  |
| 2 Spectrometer            | vnmrs   |
| 3 Solvent                 | cdcl3   |
| 4 Temperature             | 20.0    |
| 5 Pulse Sequence          | s2pul   |
| 6 Experiment              | 1D      |
| 7 Number of Scans         | 1072    |
| 8 Receiver Gain           | 30      |
| 9 Relaxation Delay        | 2.0000  |
| 10 Acquisition Time       | 1.3107  |
| 11 Spectrometer Frequency | 100.53  |
| 12 Spectral Width         | 25000.0 |
| 13 Lowest Frequency       | -1413.9 |
| 14 Nucleus                | 13C     |

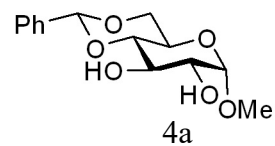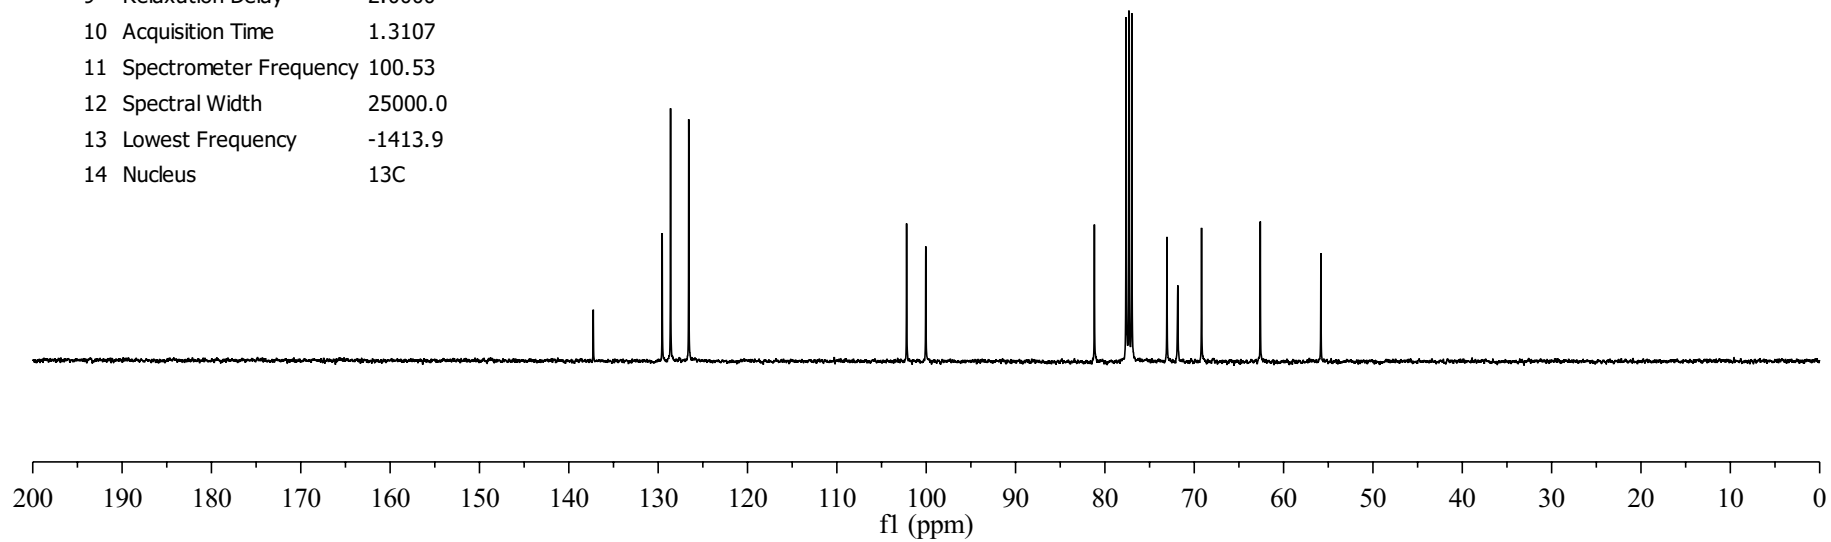

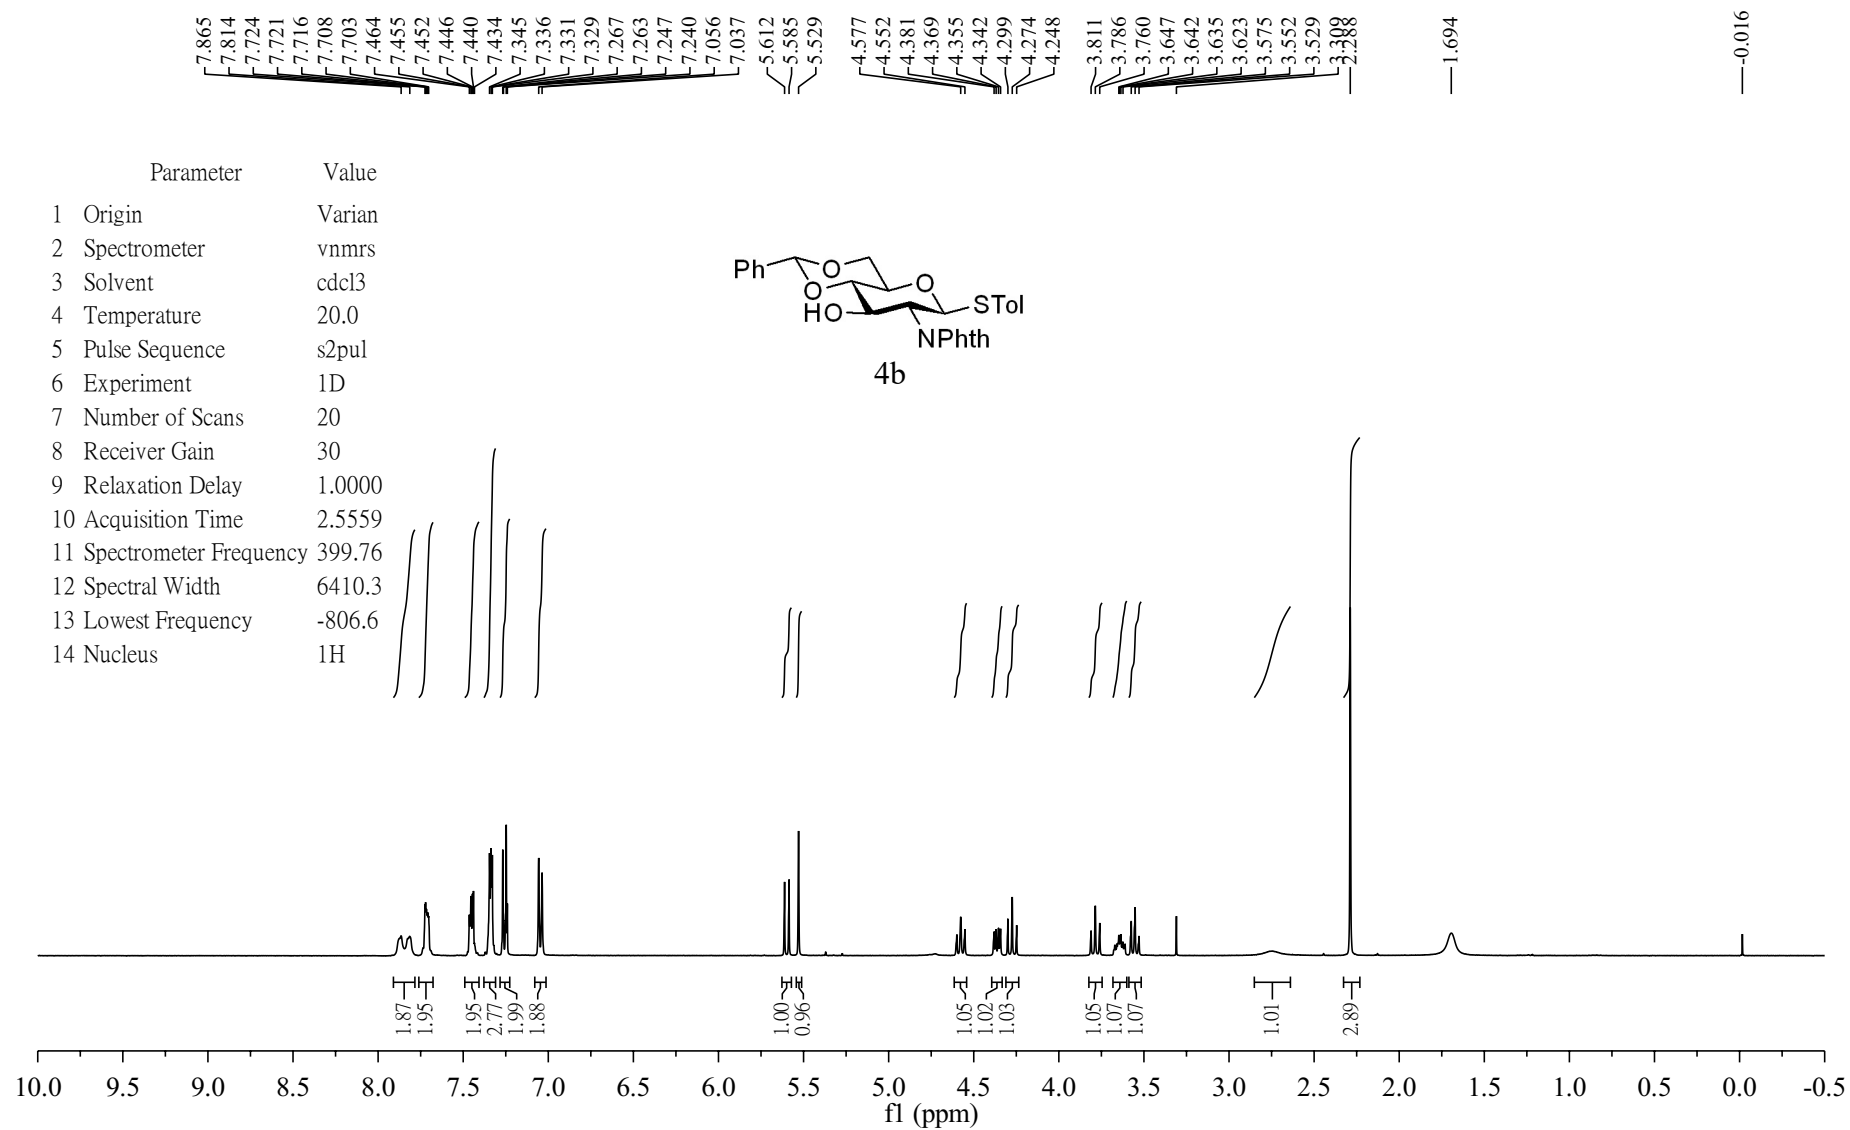



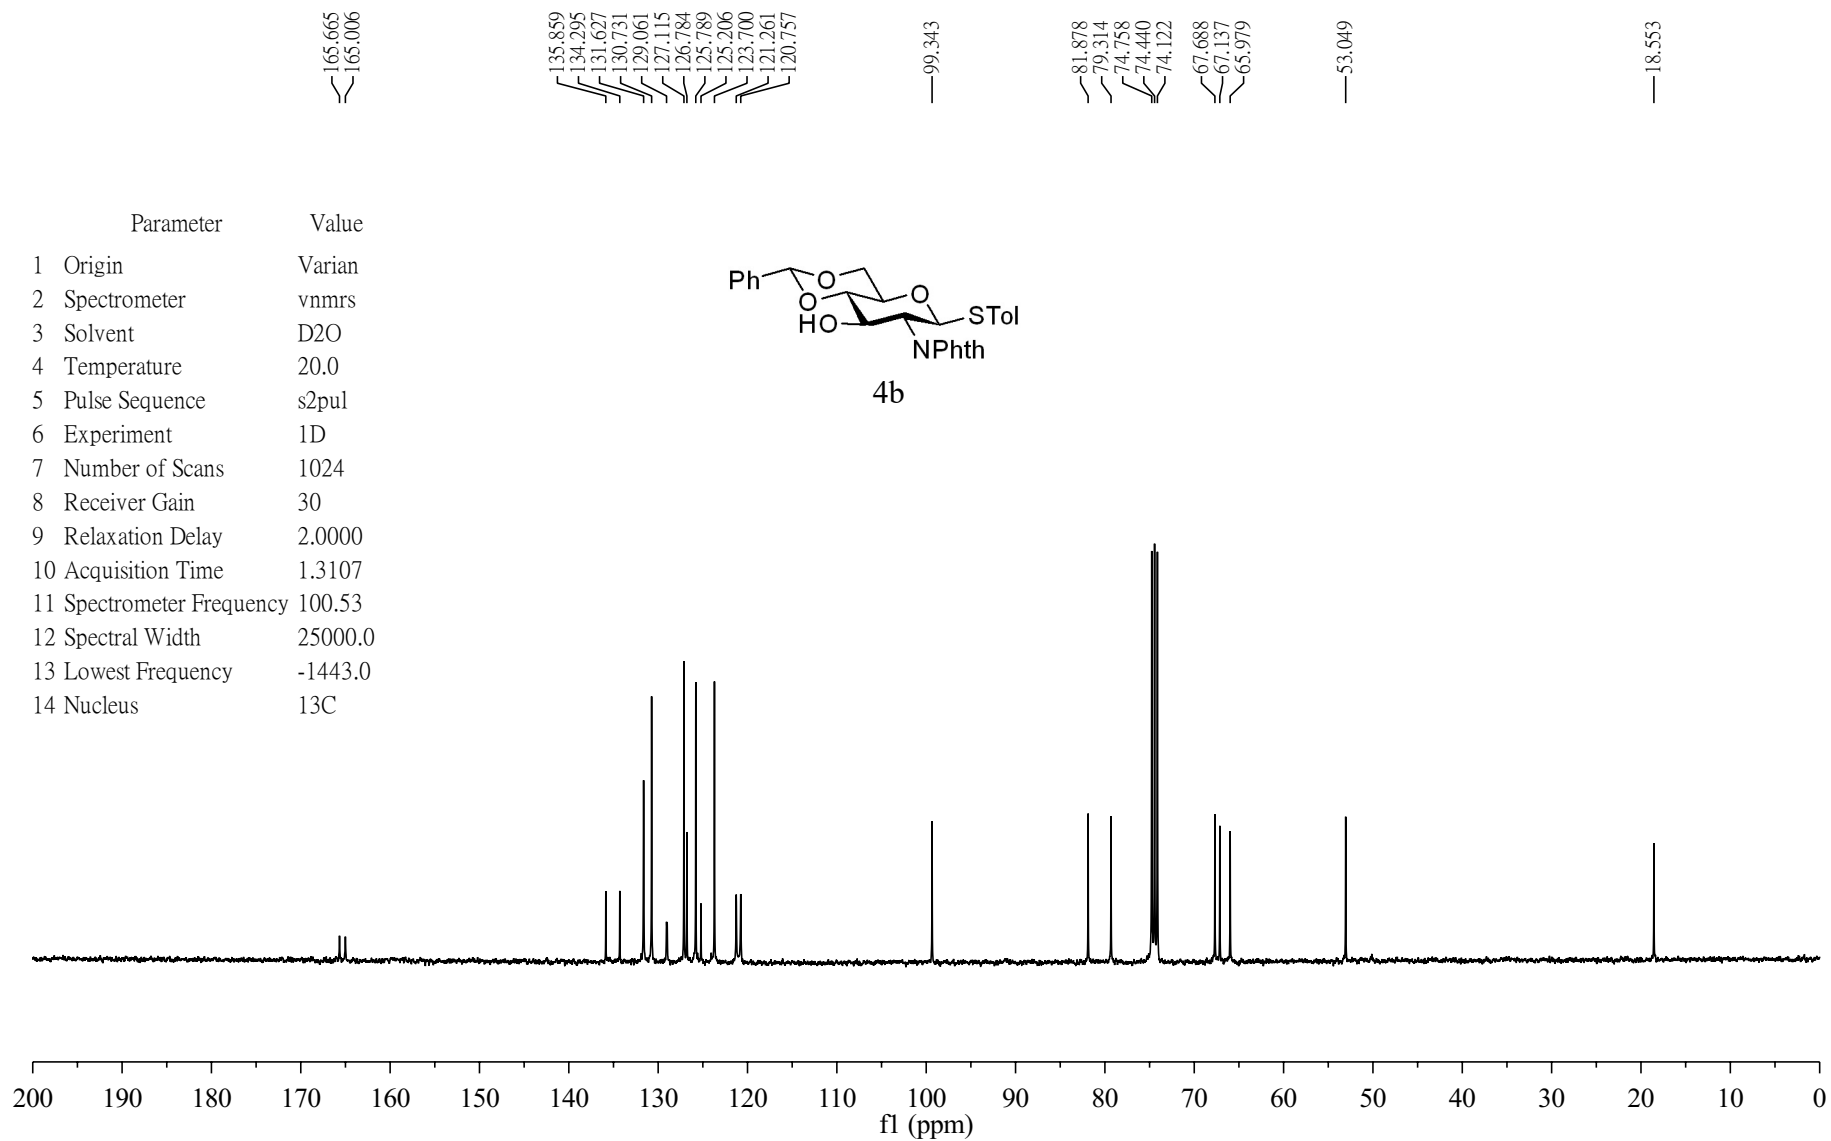

| Parameter                 | Value   |
|---------------------------|---------|
| 1 Origin                  | Varian  |
| 2 Spectrometer            | nmrs    |
| 3 Solvent                 | D2O     |
| 4 Temperature             | 20.0    |
| 5 Pulse Sequence          | s2pul   |
| 6 Experiment              | 1D      |
| 7 Number of Scans         | 1024    |
| 8 Receiver Gain           | 30      |
| 9 Relaxation Delay        | 2.0000  |
| 10 Acquisition Time       | 1.3107  |
| 11 Spectrometer Frequency | 100.53  |
| 12 Spectral Width         | 25000.0 |
| 13 Lowest Frequency       | -1443.0 |
| 14 Nucleus                | 13C     |

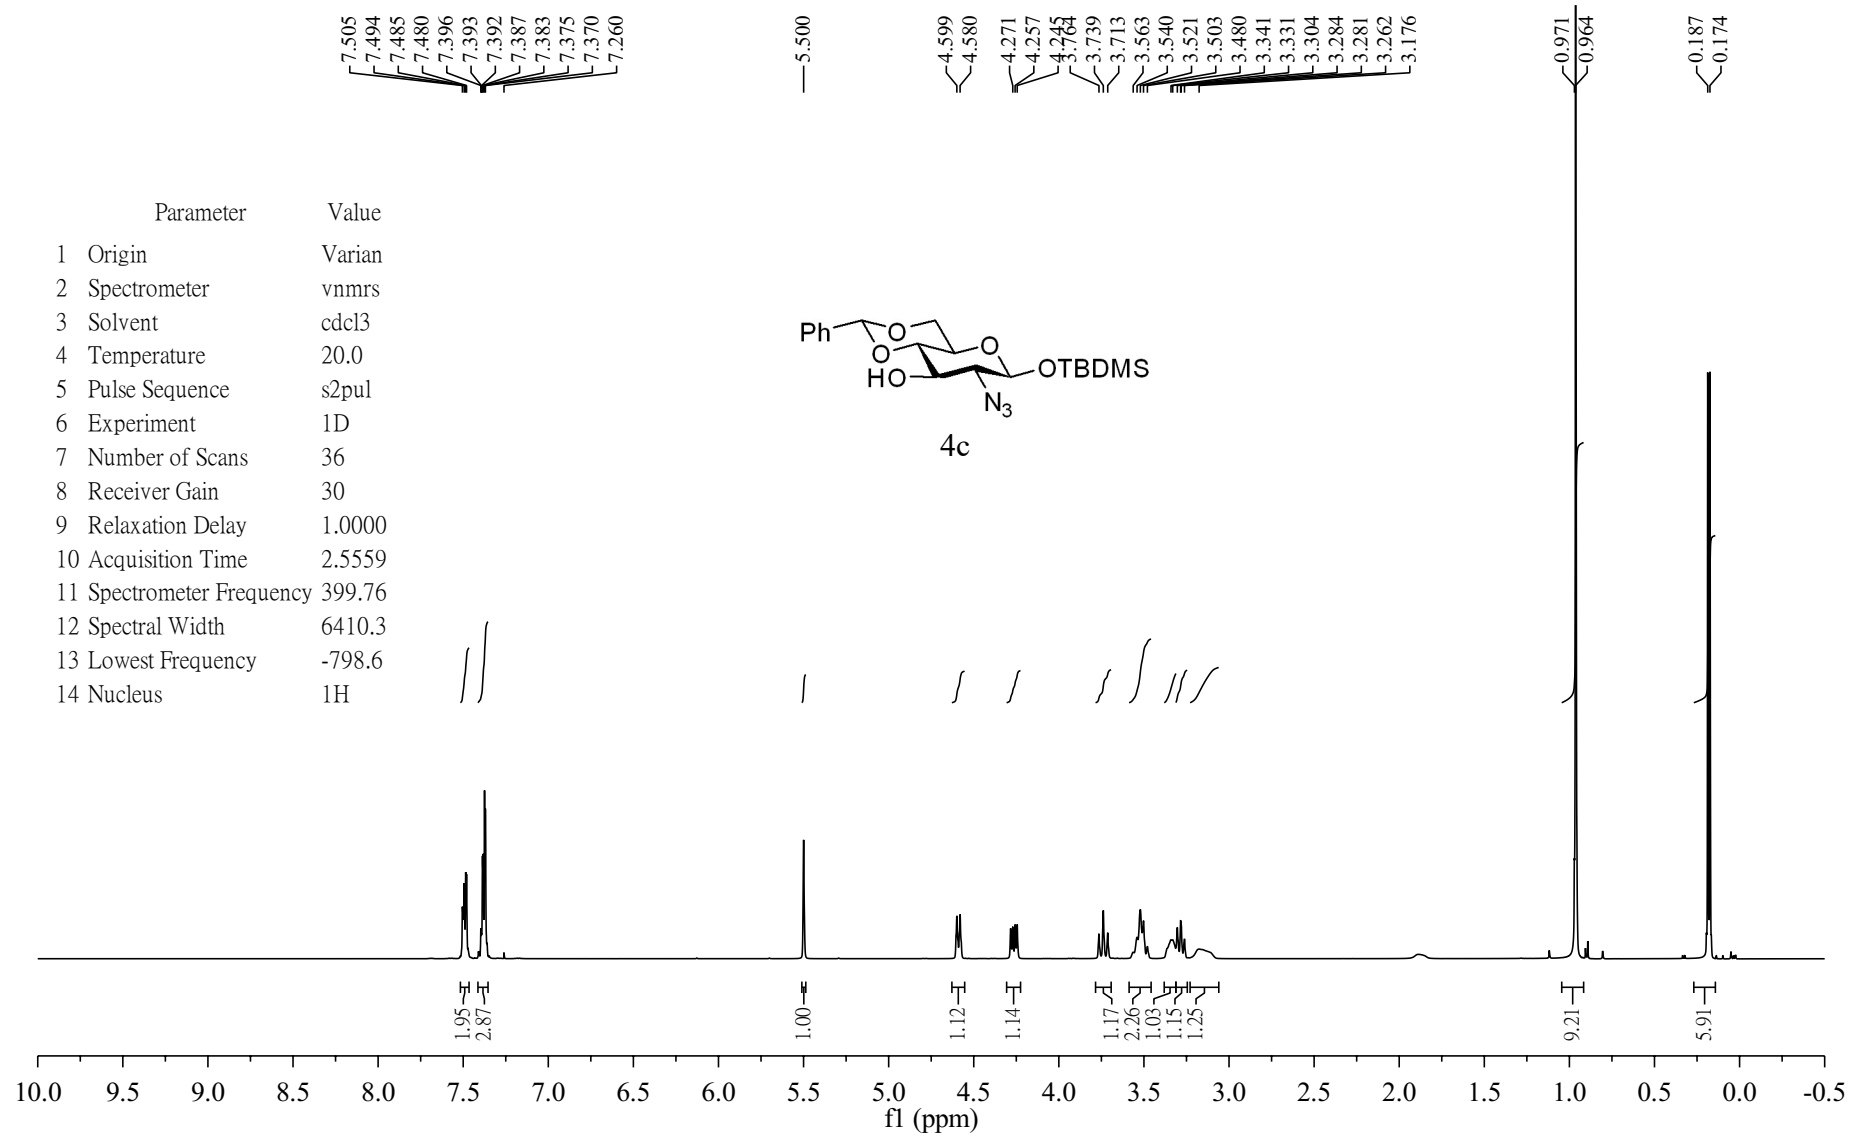

— 136.808  
 { 129.243  
 { 128.268  
 { 126.247  
  
 — 101.834  
 — 97.397  
  
 { 80.650  
 { 77.318  
 { 77.000  
 { 76.682  
 { 71.501  
 { 68.874  
 { 68.397  
 { 66.149  
  
 — 25.474  
 — 17.818  
  
 { -4.431  
 { -5.253

| Parameter                 | Value   |
|---------------------------|---------|
| 1 Origin                  | Varian  |
| 2 Spectrometer            | vnmrs   |
| 3 Solvent                 | cdcl3   |
| 4 Temperature             | 20.0    |
| 5 Pulse Sequence          | s2pul   |
| 6 Experiment              | 1D      |
| 7 Number of Scans         | 80      |
| 8 Receiver Gain           | 30      |
| 9 Relaxation Delay        | 2.0000  |
| 10 Acquisition Time       | 1.3107  |
| 11 Spectrometer Frequency | 100.53  |
| 12 Spectral Width         | 25000.0 |
| 13 Lowest Frequency       | -1452.2 |
| 14 Nucleus                | 13C     |

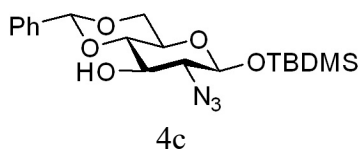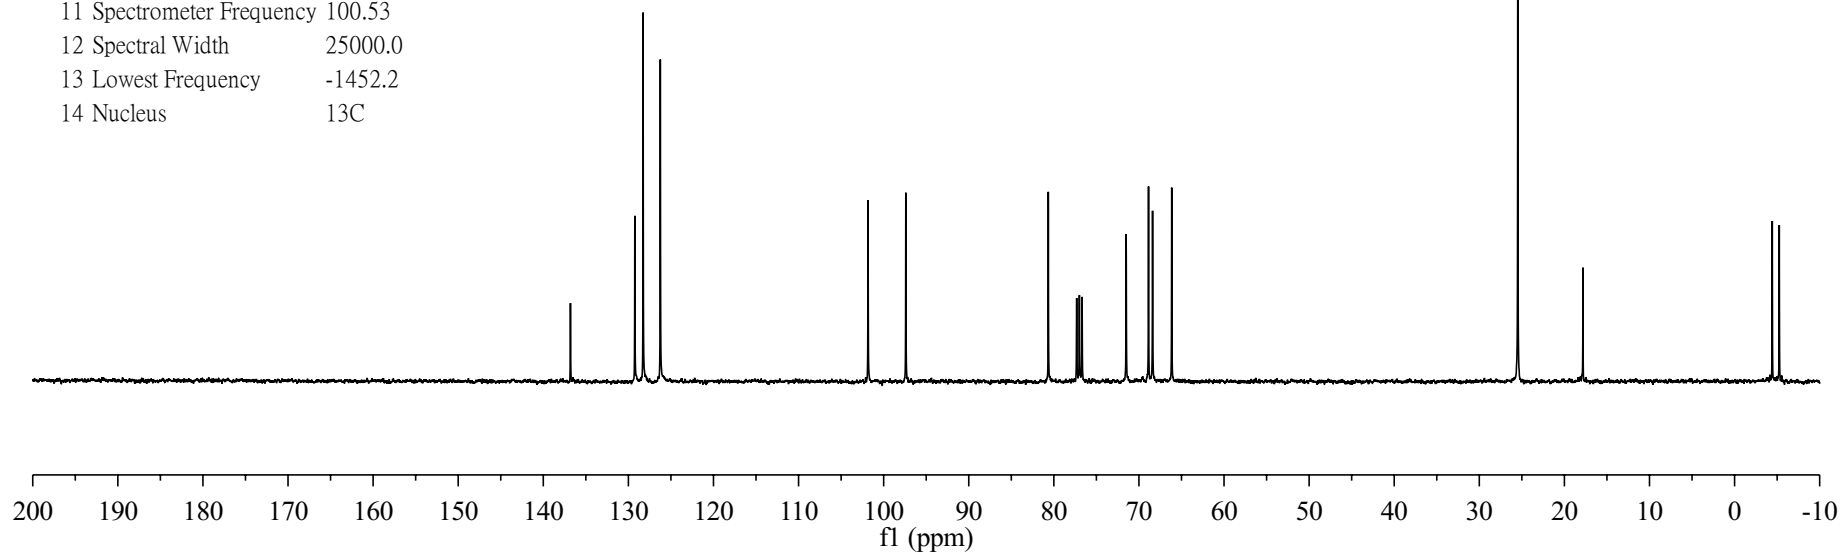

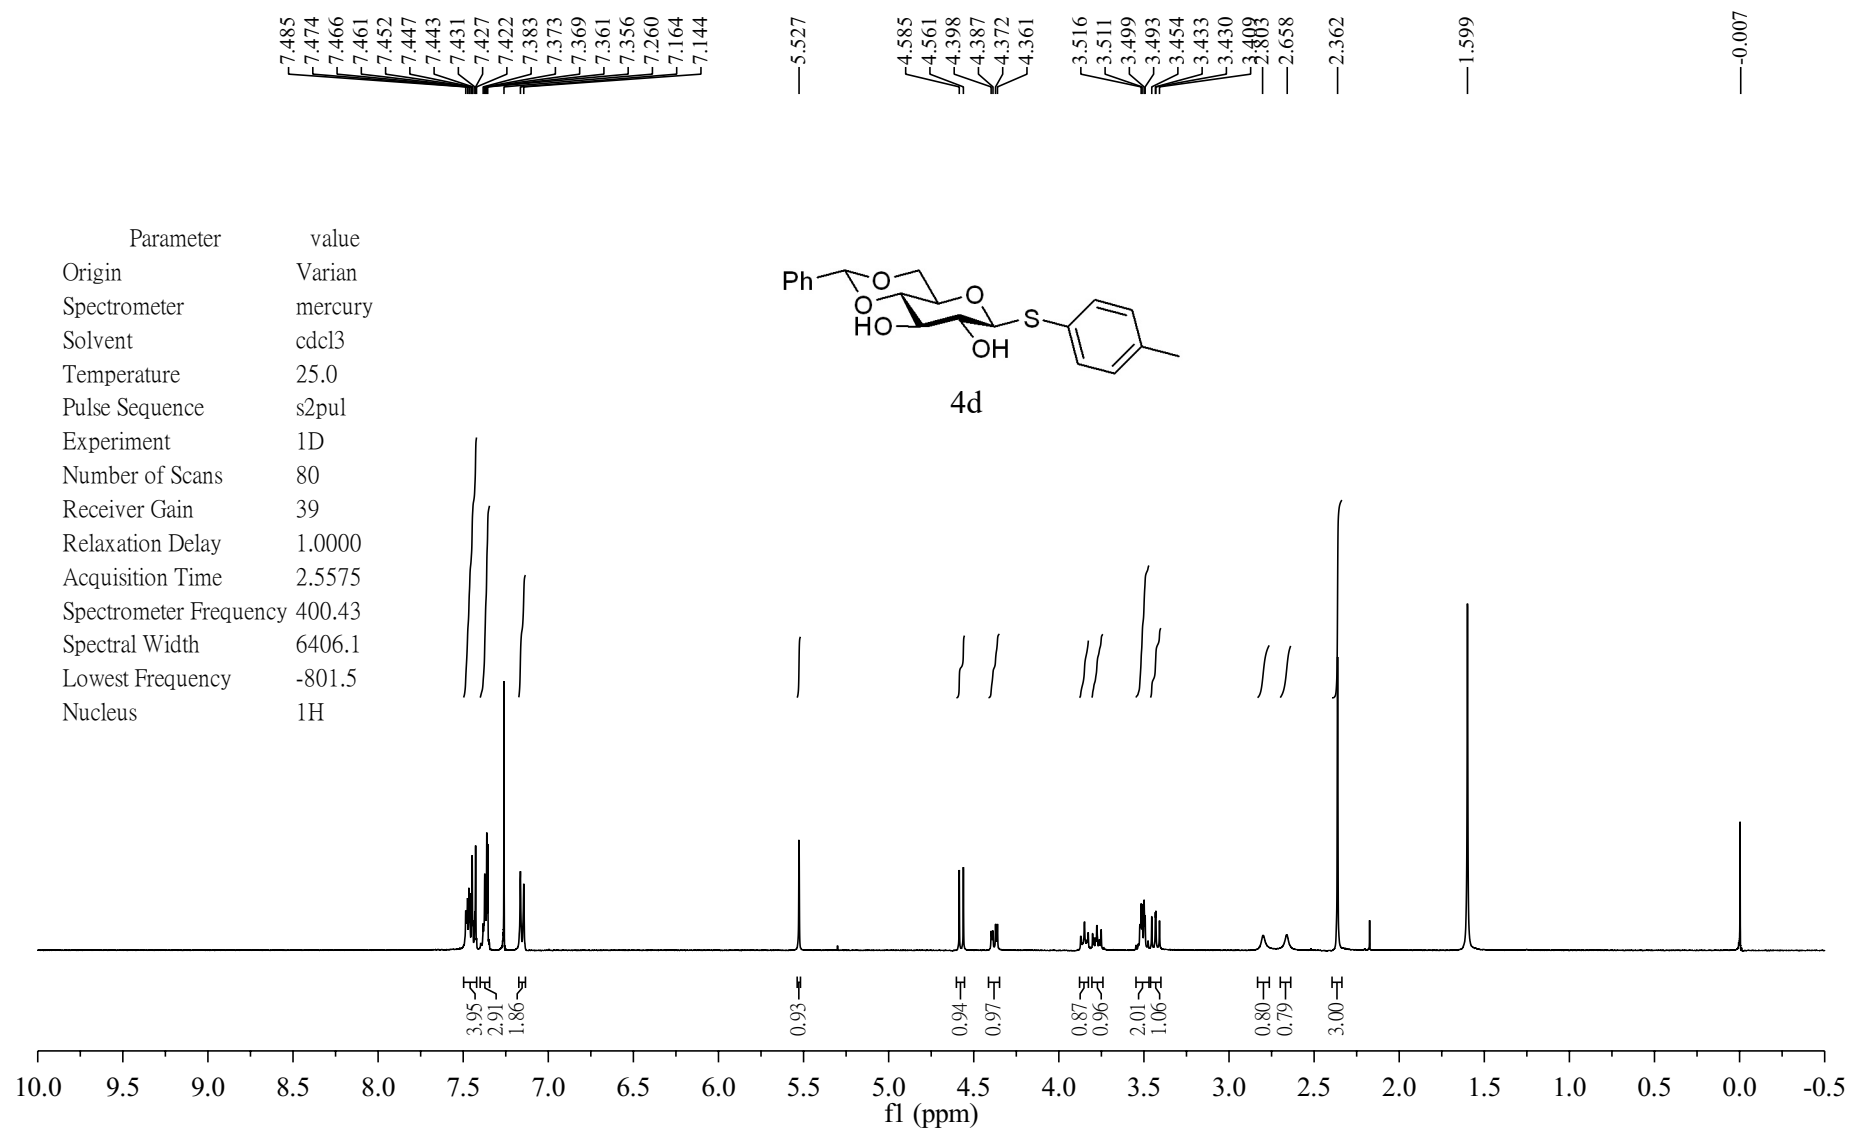

138.633  
136.787  
133.471  
129.782  
129.248  
128.292  
127.365  
126.248

101.758

88.501

80.052  
77.309  
76.991  
76.673  
74.346  
72.399  
70.301  
68.448

21.126

| Parameter              | value           |
|------------------------|-----------------|
| Origin                 | Varian          |
| Spectrometer           | nmrs            |
| Solvent                | cdcl3           |
| Temperature            | 20.0            |
| Pulse Sequence         | s2pul           |
| Experiment             | 1D              |
| Number of Scans        | 1204            |
| Receiver Gain          | 30              |
| Relaxation Delay       | 2.0000          |
| Acquisition Time       | 1.3107          |
| Spectrometer Frequency | 100.53          |
| Spectral Width         | 25000.0         |
| Lowest Frequency       | -1450.9         |
| Nucleus                | <sup>13</sup> C |

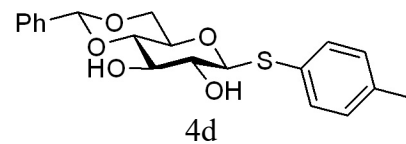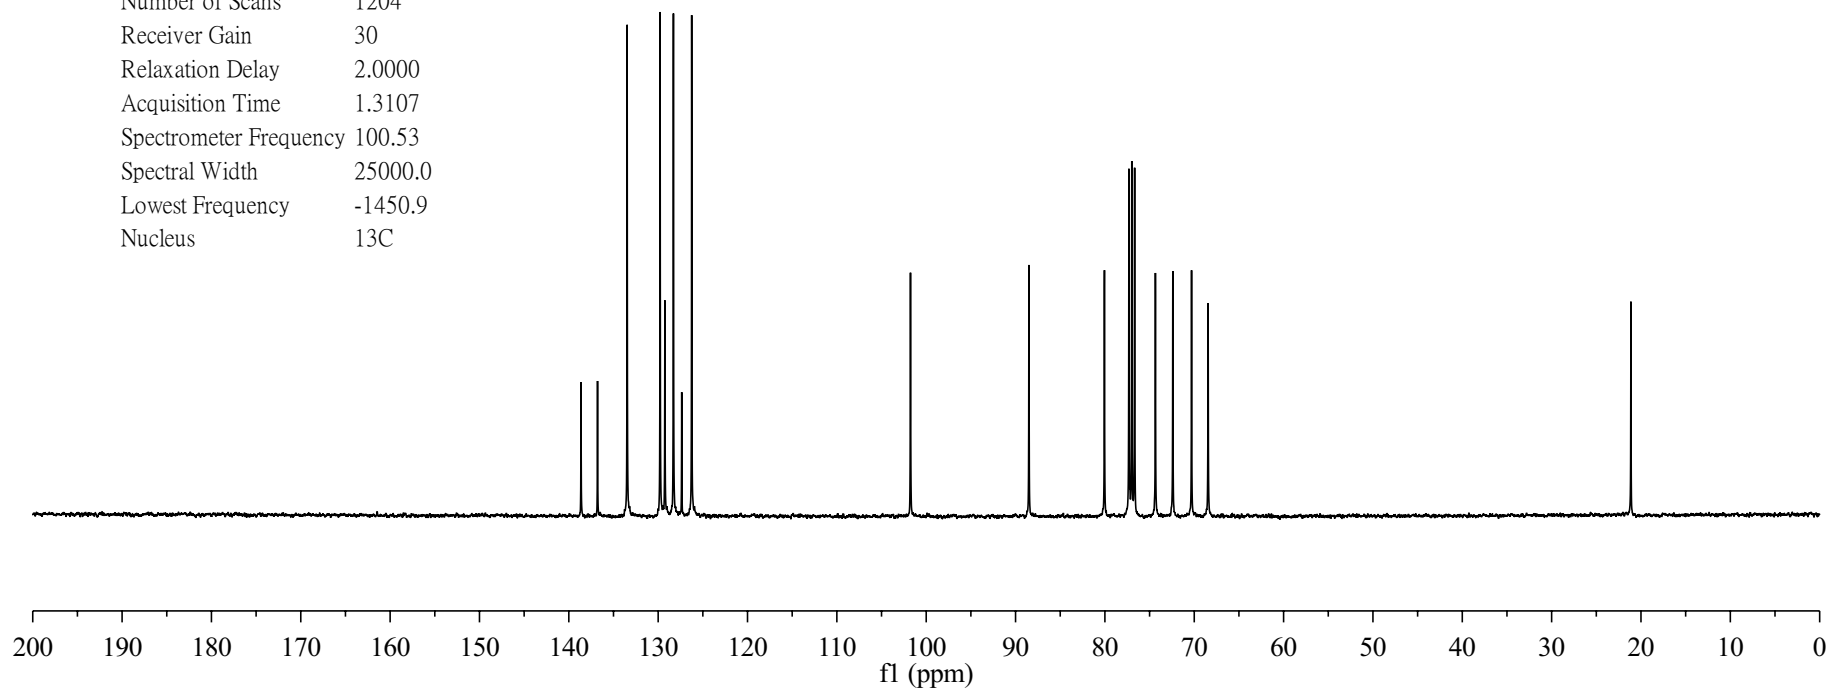

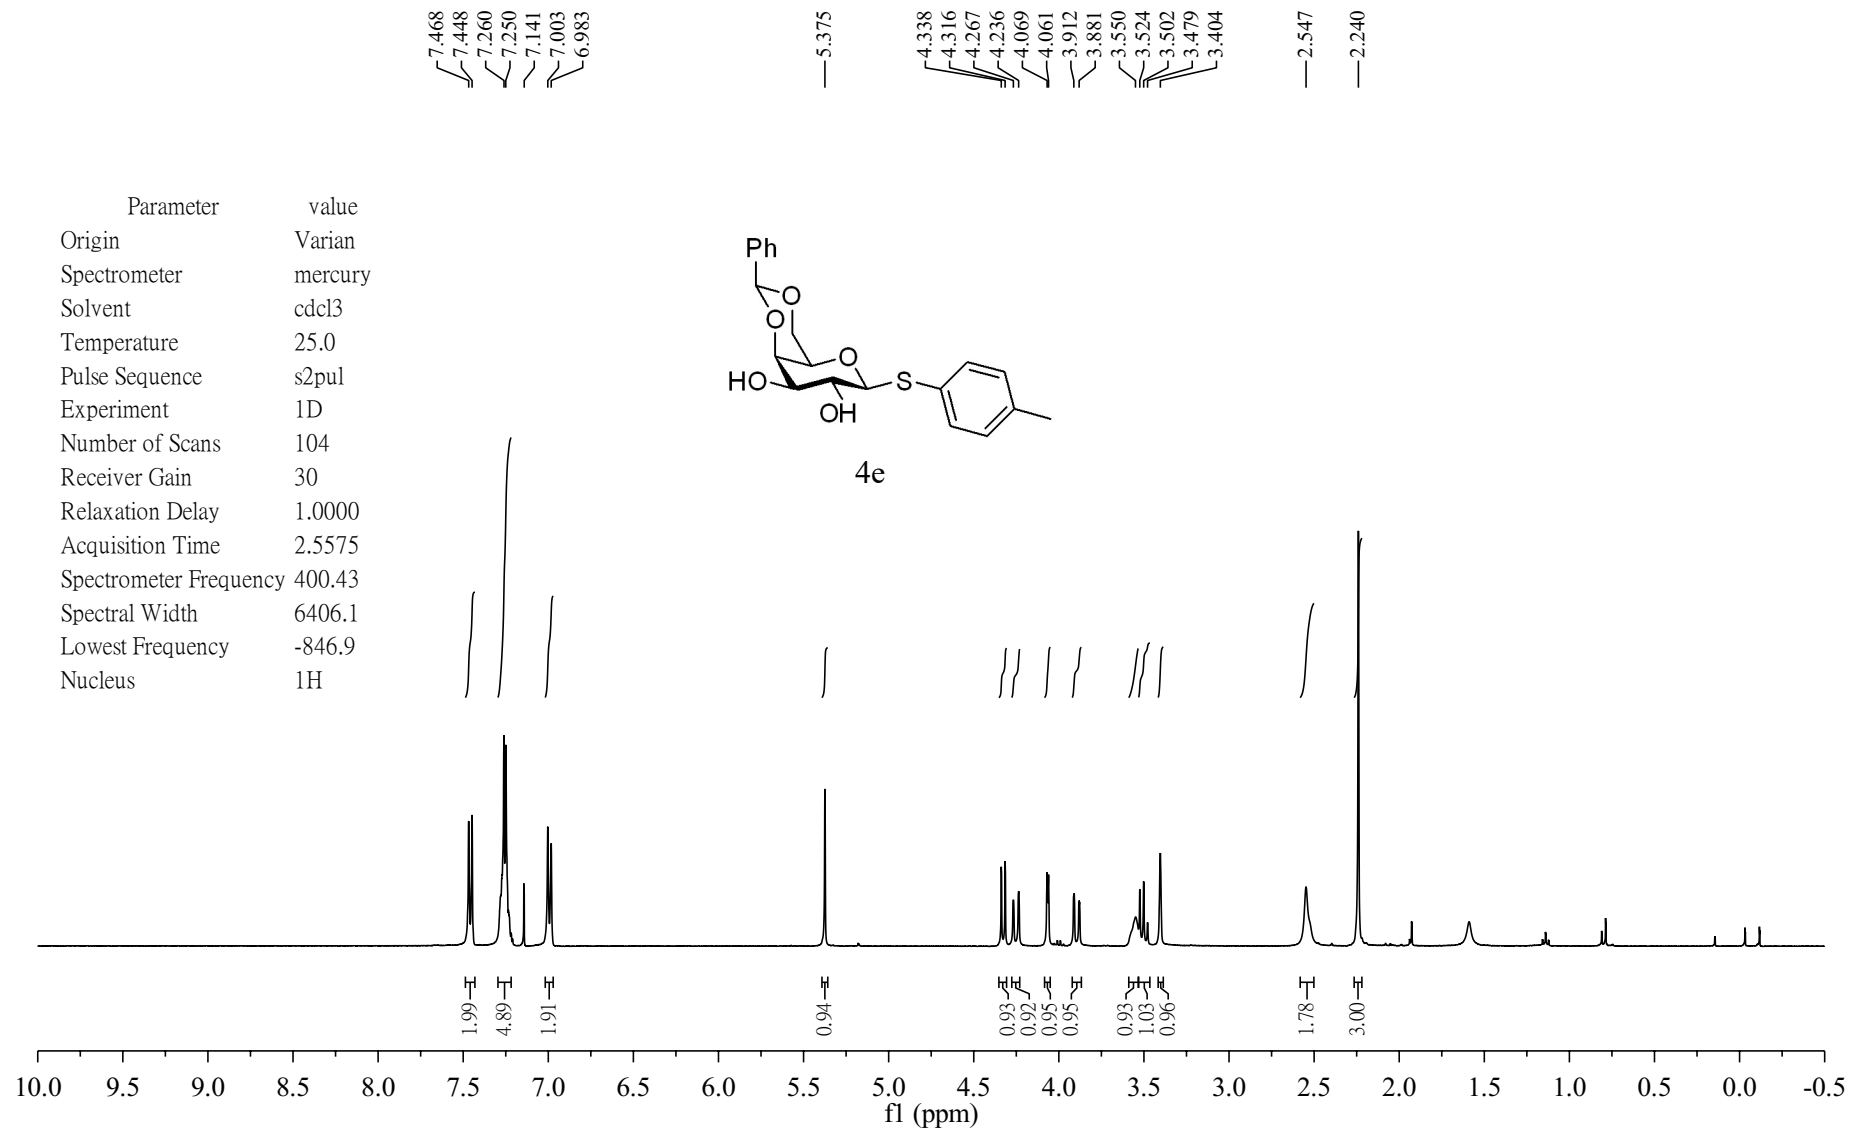

138.472  
137.538  
134.228  
129.673  
129.299  
128.144  
126.532

101.327

86.934

77.309  
76.991  
76.673  
75.287  
73.774  
69.911  
69.252  
68.600

21.222

| Parameter              | value   |
|------------------------|---------|
| Origin                 | Varian  |
| Spectrometer           | nmrs    |
| Solvent                | cdcl3   |
| Temperature            | 20.0    |
| Pulse Sequence         | s2pul   |
| Experiment             | 1D      |
| Number of Scans        | 732     |
| Receiver Gain          | 30      |
| Relaxation Delay       | 2.0000  |
| Acquisition Time       | 1.3107  |
| Spectrometer Frequency | 100.53  |
| Spectral Width         | 25000.0 |
| Lowest Frequency       | -1446.3 |
| Nucleus                | 13C     |

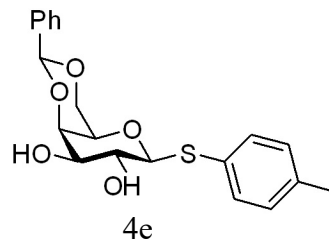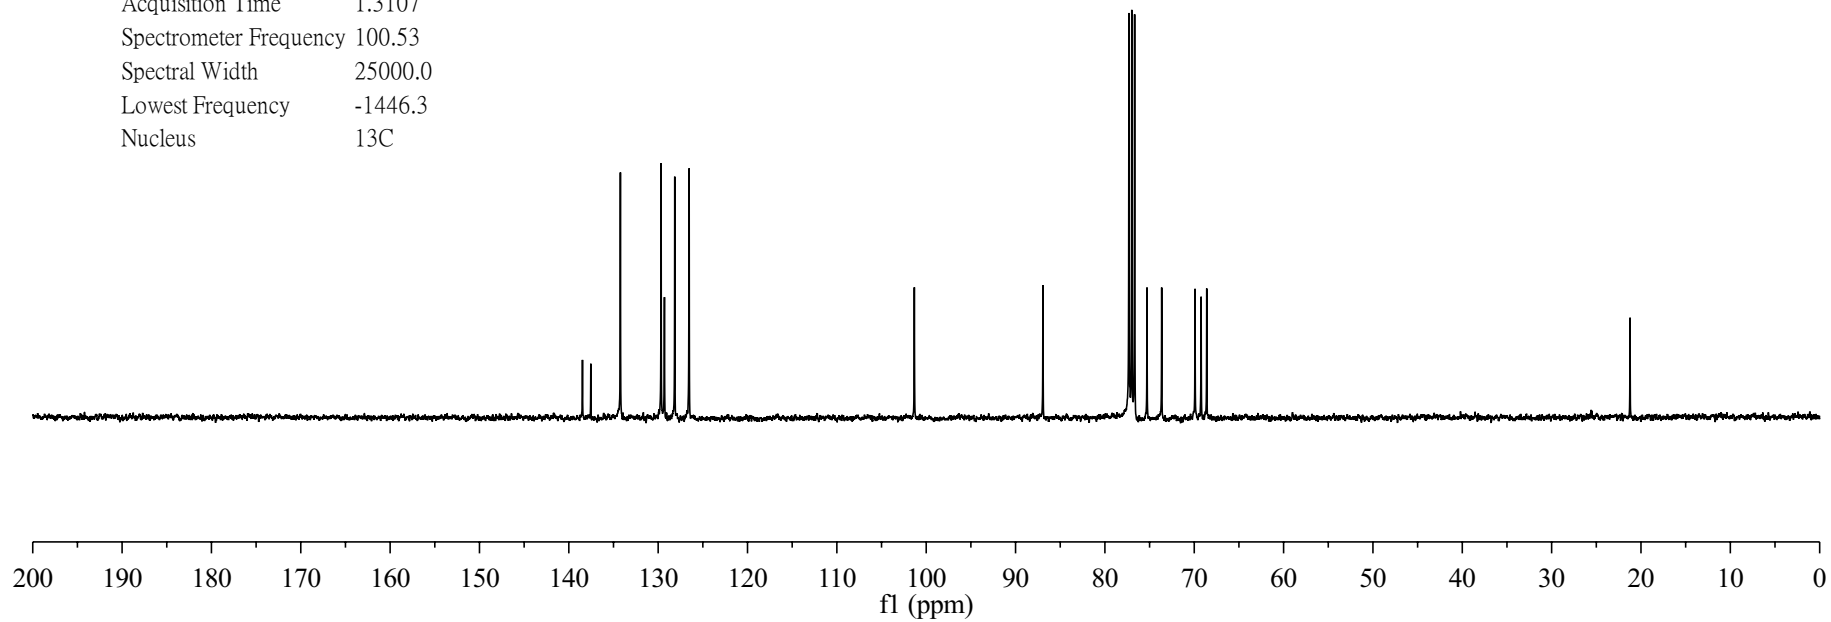

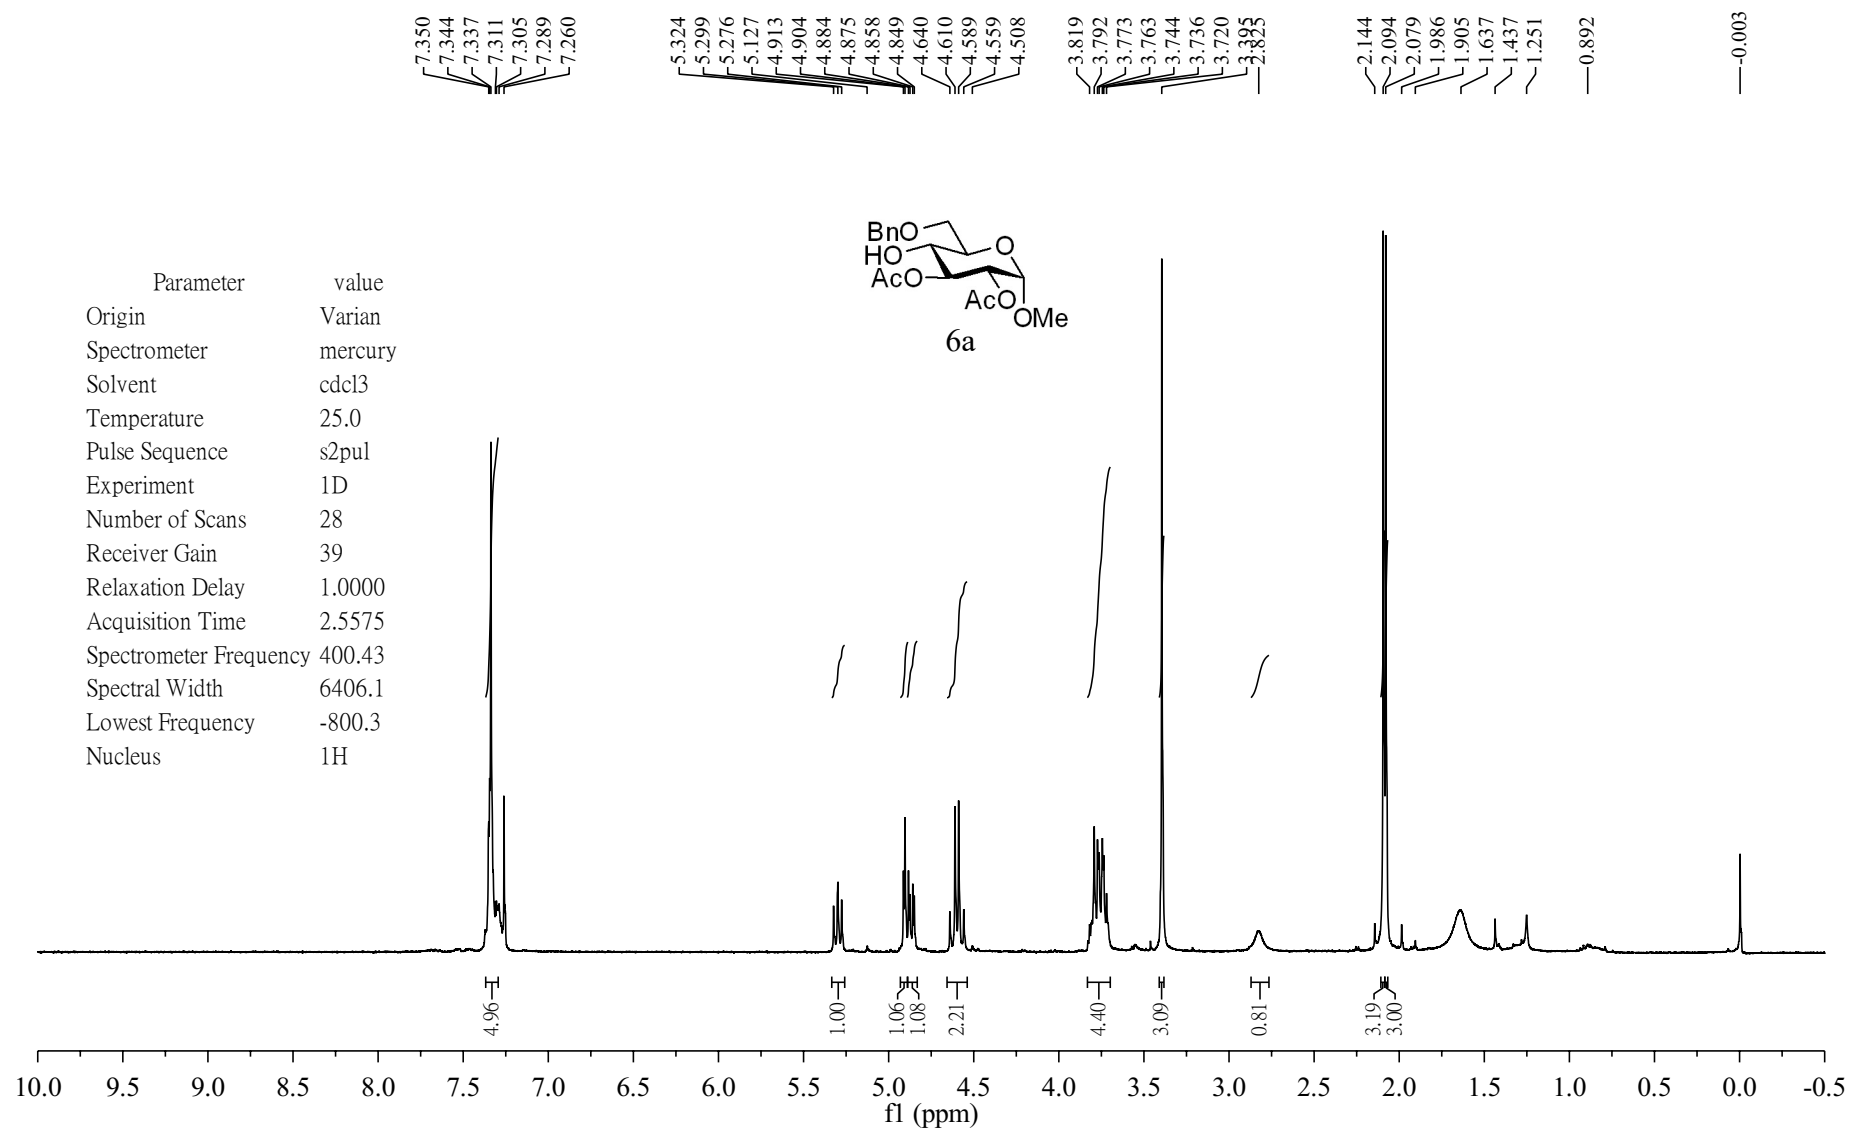



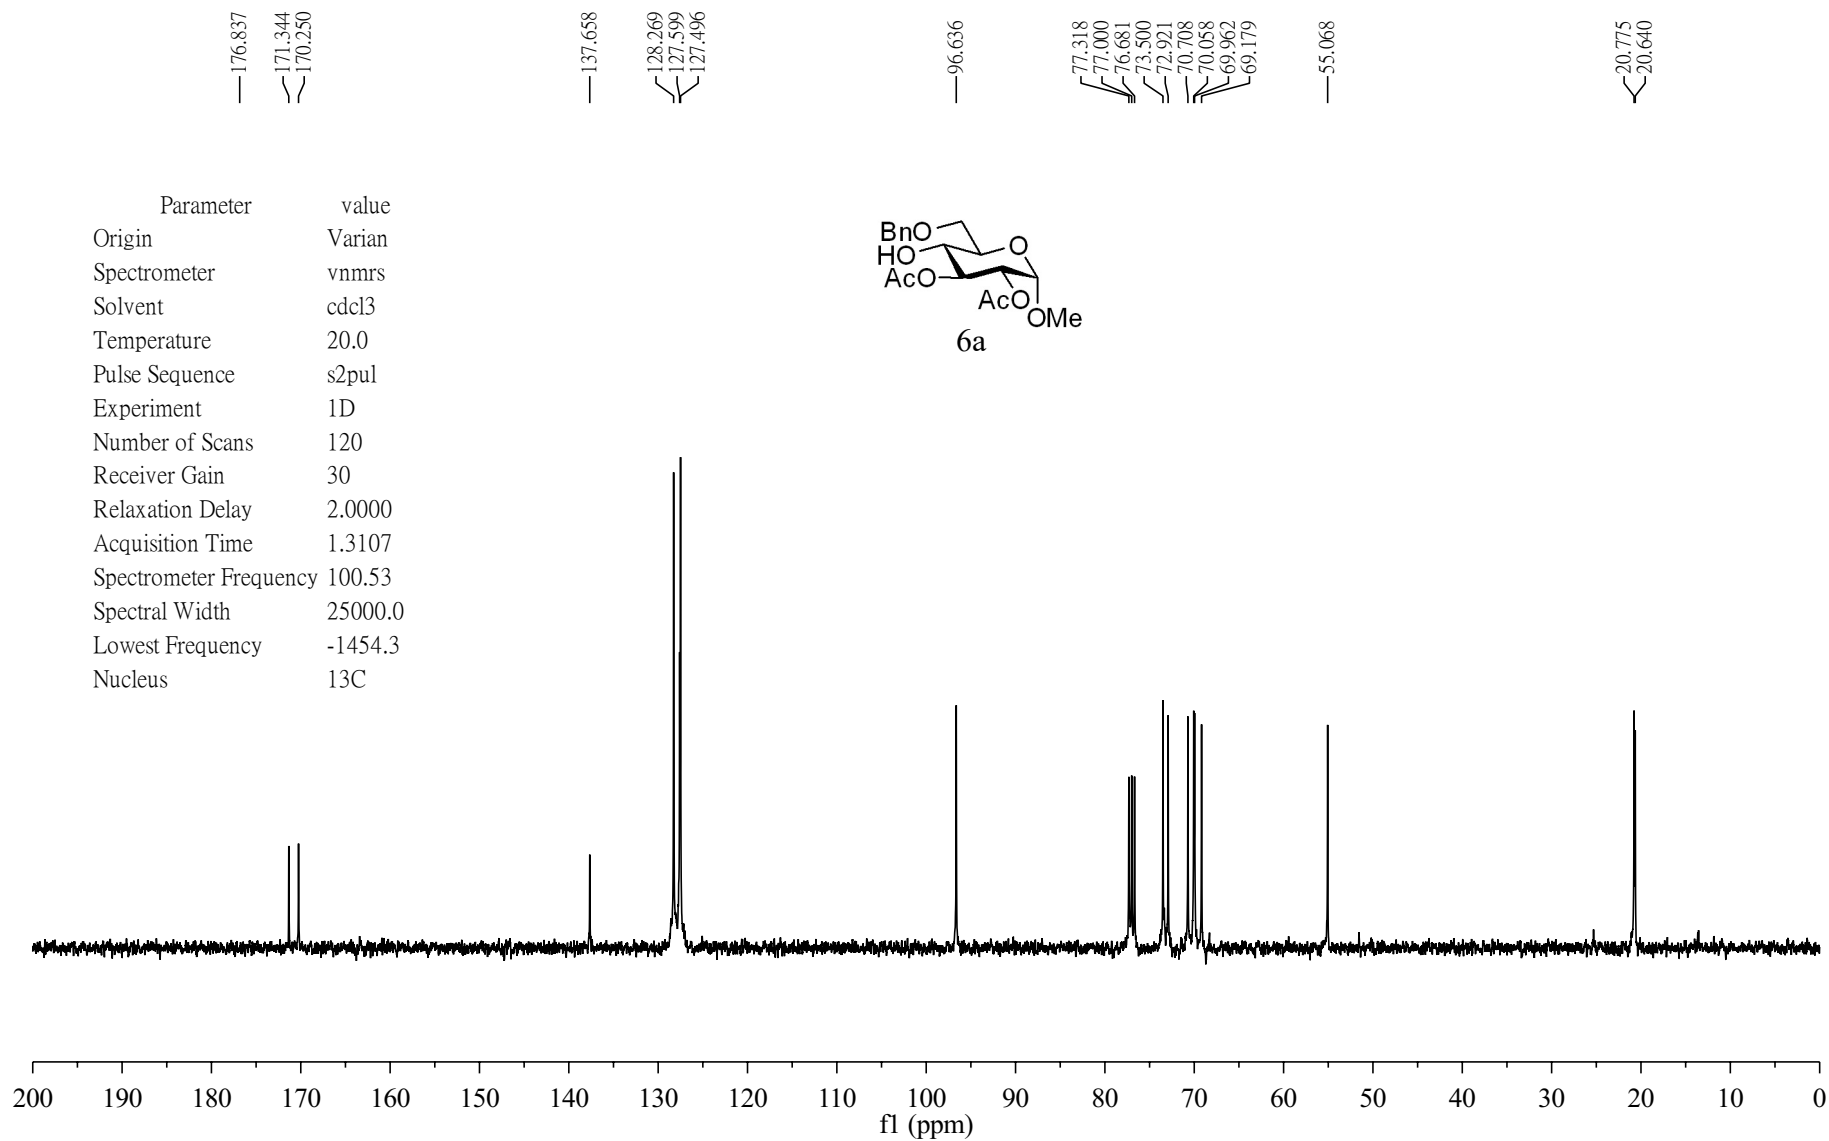

| Parameter              | value   |
|------------------------|---------|
| Origin                 | Varian  |
| Spectrometer           | nmrs    |
| Solvent                | cdcl3   |
| Temperature            | 20.0    |
| Pulse Sequence         | s2pul   |
| Experiment             | 1D      |
| Number of Scans        | 120     |
| Receiver Gain          | 30      |
| Relaxation Delay       | 2.0000  |
| Acquisition Time       | 1.3107  |
| Spectrometer Frequency | 100.53  |
| Spectral Width         | 25000.0 |
| Lowest Frequency       | -1454.3 |
| Nucleus                | 13C     |

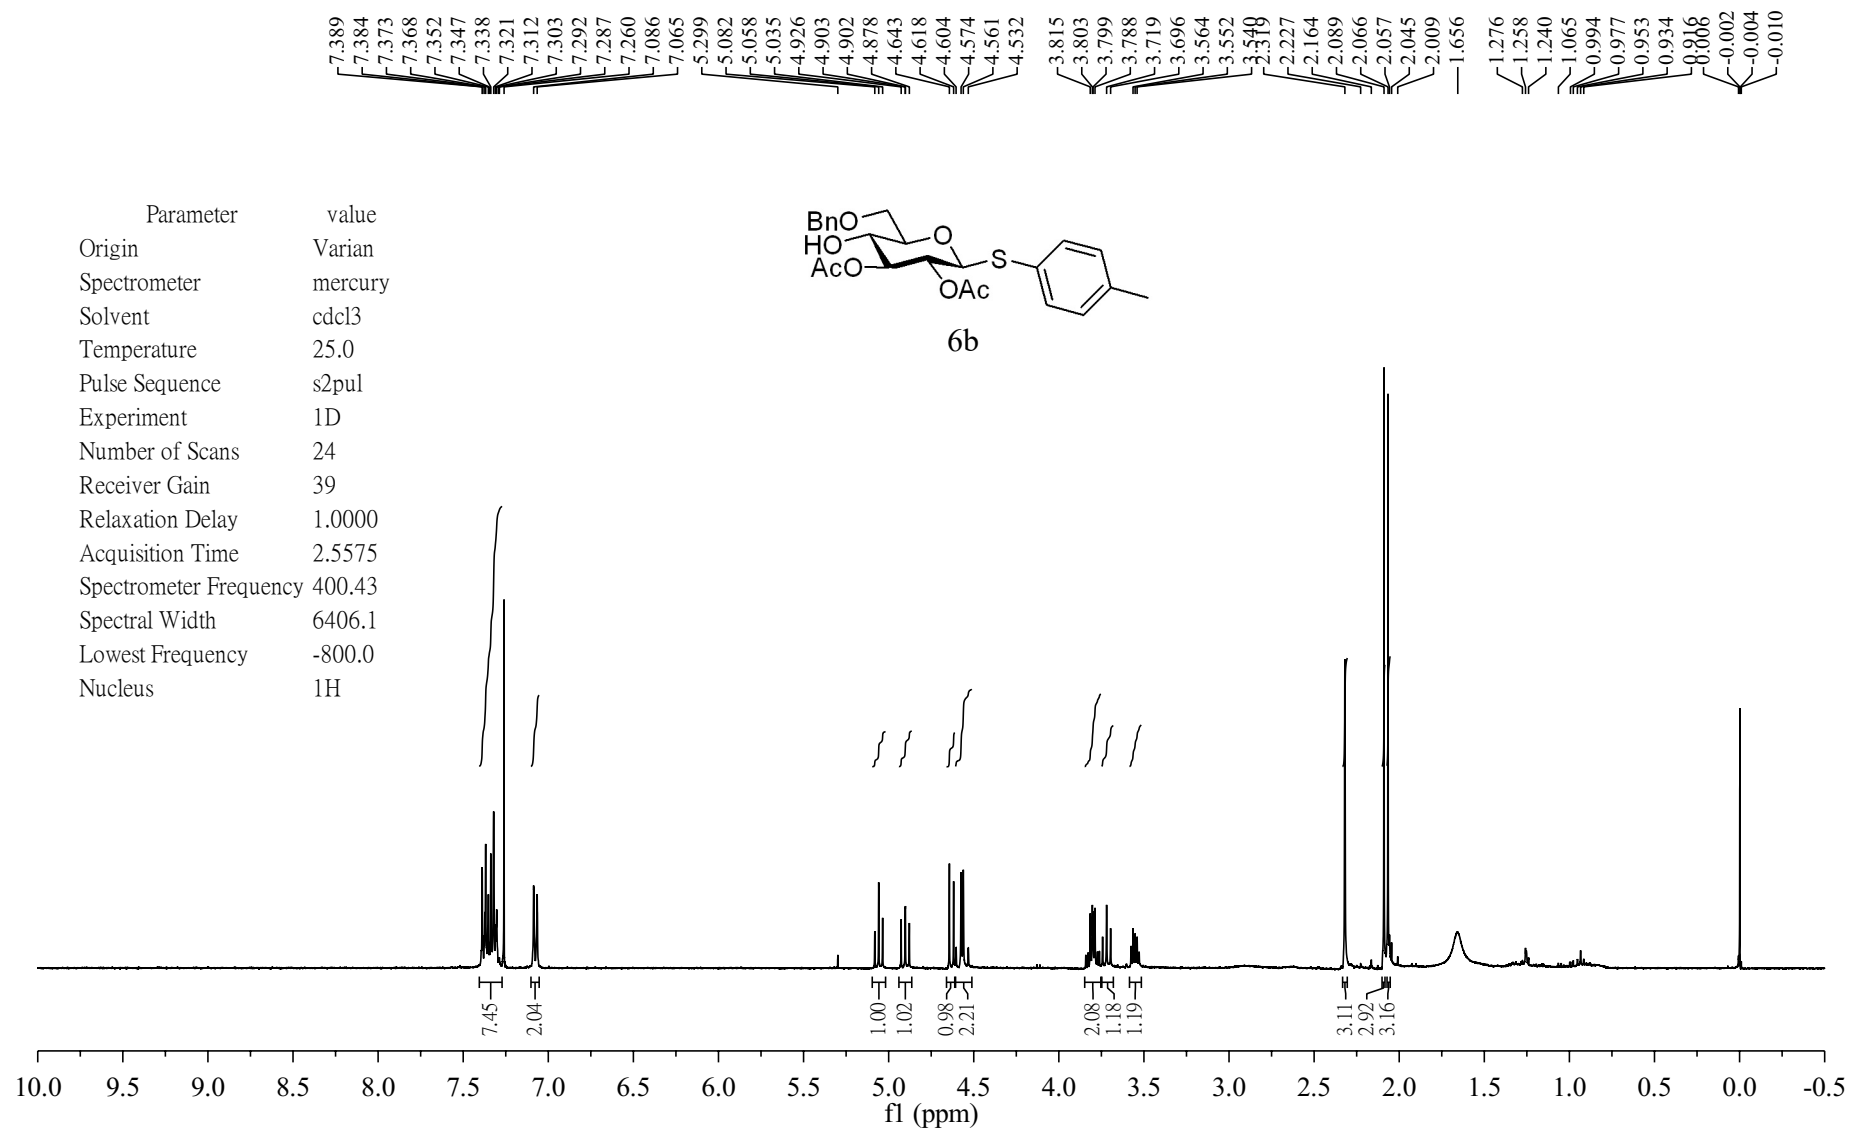

171.155  
169.519

138.352  
137.587  
133.351  
129.598  
128.365  
127.980  
127.756  
127.641

85.758  
78.441  
77.318  
77.000  
76.681  
73.653  
70.012  
69.934  
69.868

21.080  
20.780

| Parameter              | value   |
|------------------------|---------|
| Origin                 | Varian  |
| Spectrometer           | vnmrs   |
| Solvent                | cdcl3   |
| Temperature            | 20.0    |
| Pulse Sequence         | s2pul   |
| Experiment             | 1D      |
| Number of Scans        | 80      |
| Receiver Gain          | 30      |
| Relaxation Delay       | 2.0000  |
| Acquisition Time       | 1.3107  |
| Spectrometer Frequency | 100.53  |
| Spectral Width         | 25000.0 |
| Lowest Frequency       | -1418.8 |
| Nucleus                | 13C     |

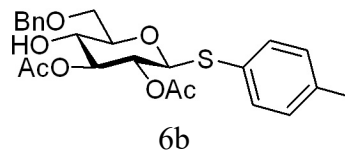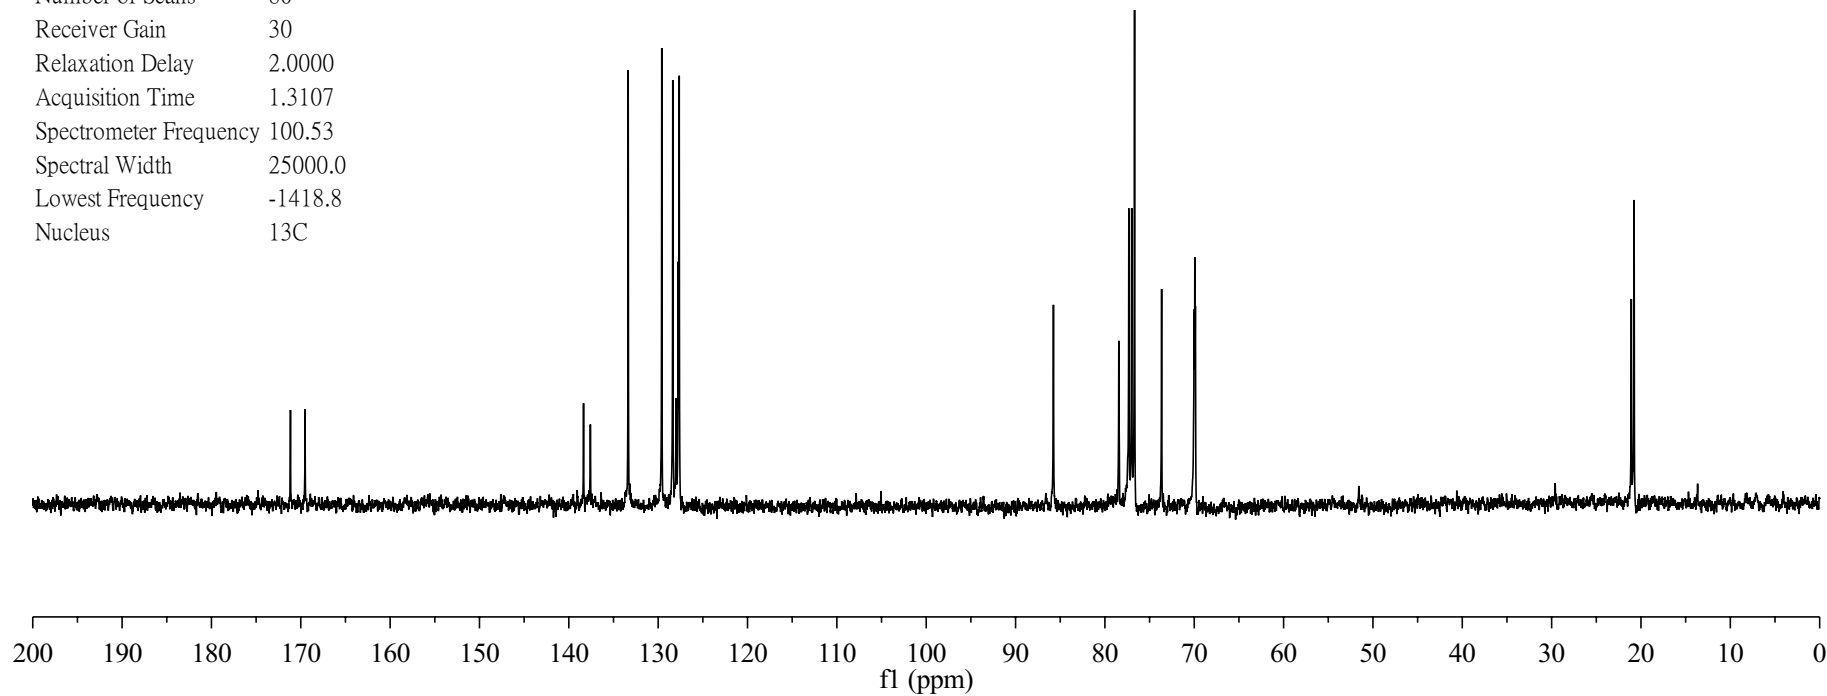

7.472  
7.452  
7.433  
7.429  
7.413  
7.366  
7.353  
7.350  
7.344  
7.336  
7.331  
7.323  
7.319  
7.314  
7.306  
7.298  
7.260  
7.111  
7.062  
7.042  
4.935  
4.924  
4.910  
4.895  
4.793  
4.765  
4.753  
4.727  
4.639  
4.615  
4.575  
4.564  
3.782  
3.770  
3.757  
3.644  
3.527  
3.505  
3.478  
3.469  
3.455  
3.433  
2.552  
2.334  
2.312  
2.153

| Parameter              | value          |
|------------------------|----------------|
| Origin                 | Varian         |
| Spectrometer           | mercury        |
| Solvent                | cdcl3          |
| Temperature            | 25.0           |
| Pulse Sequence         | s2pul          |
| Experiment             | 1D             |
| Number of Scans        | 64             |
| Receiver Gain          | 39             |
| Relaxation Delay       | 1.0000         |
| Acquisition Time       | 2.5575         |
| Spectrometer Frequency | 400.43         |
| Spectral Width         | 6406.1         |
| Lowest Frequency       | -799.6         |
| Nucleus                | <sup>1</sup> H |

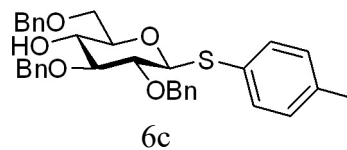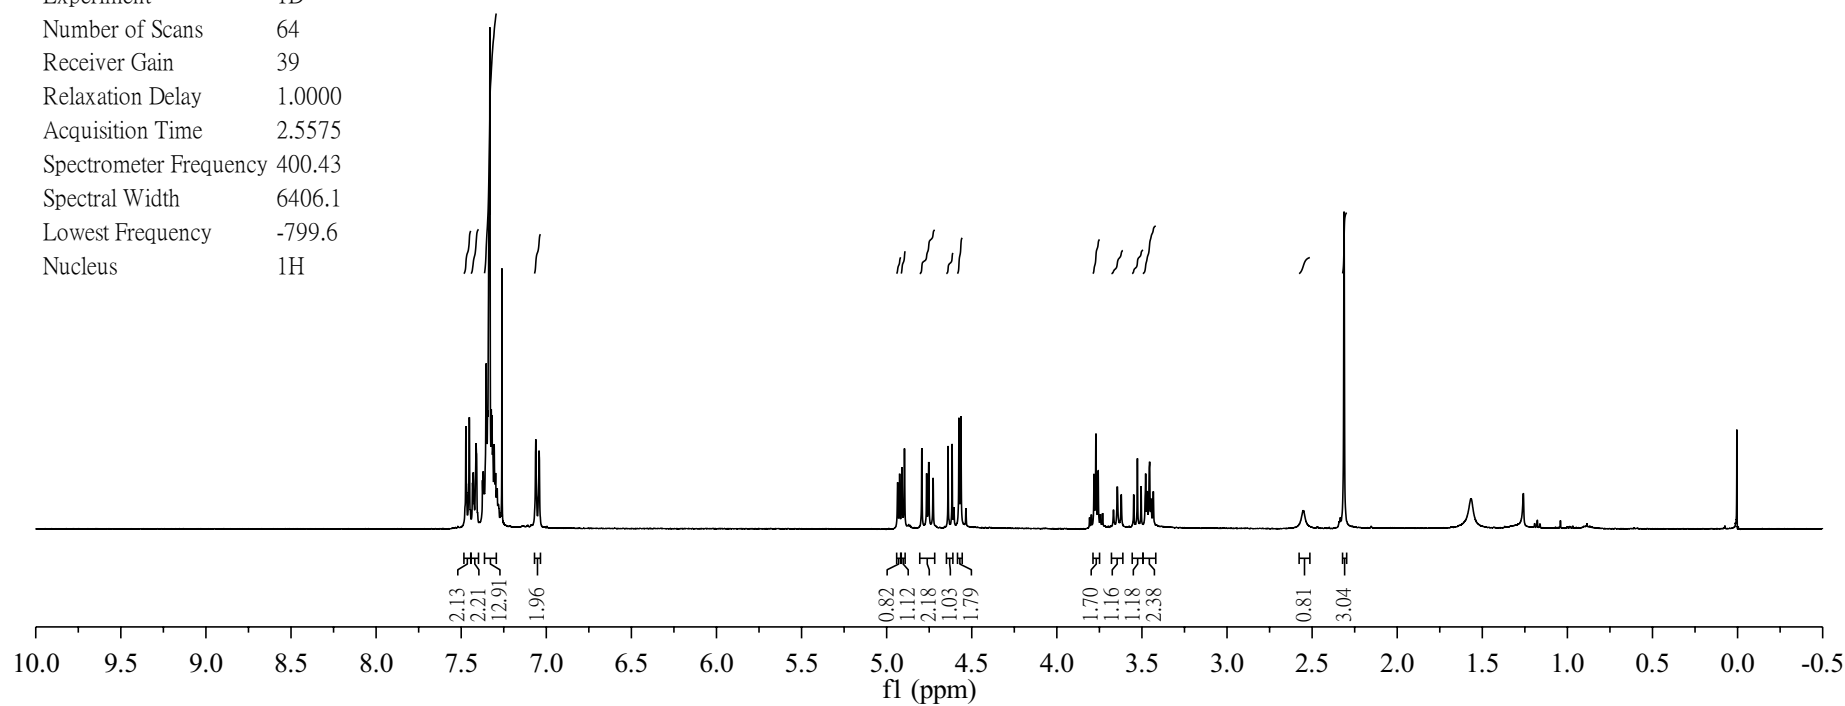

138.390  
138.165  
138.105  
137.950  
137.876  
137.727  
132.571  
129.682  
129.634  
128.565  
128.399  
128.369  
128.233  
127.915  
127.665

87.899  
86.126  
80.386  
77.989  
77.318  
77.000  
76.682  
75.457  
75.310  
73.601  
71.638  
70.330

21.090

| Parameter              | value   |
|------------------------|---------|
| Origin                 | Varian  |
| Spectrometer           | nmrs    |
| Solvent                | cdcl3   |
| Temperature            | 20.0    |
| Pulse Sequence         | s2pul   |
| Experiment             | 1D      |
| Number of Scans        | 60      |
| Receiver Gain          | 30      |
| Relaxation Delay       | 2.0000  |
| Acquisition Time       | 1.3107  |
| Spectrometer Frequency | 100.53  |
| Spectral Width         | 25000.0 |
| Lowest Frequency       | -1446.7 |
| Nucleus                | 13C     |

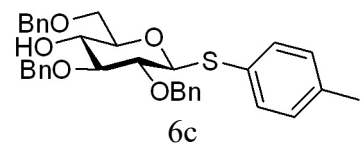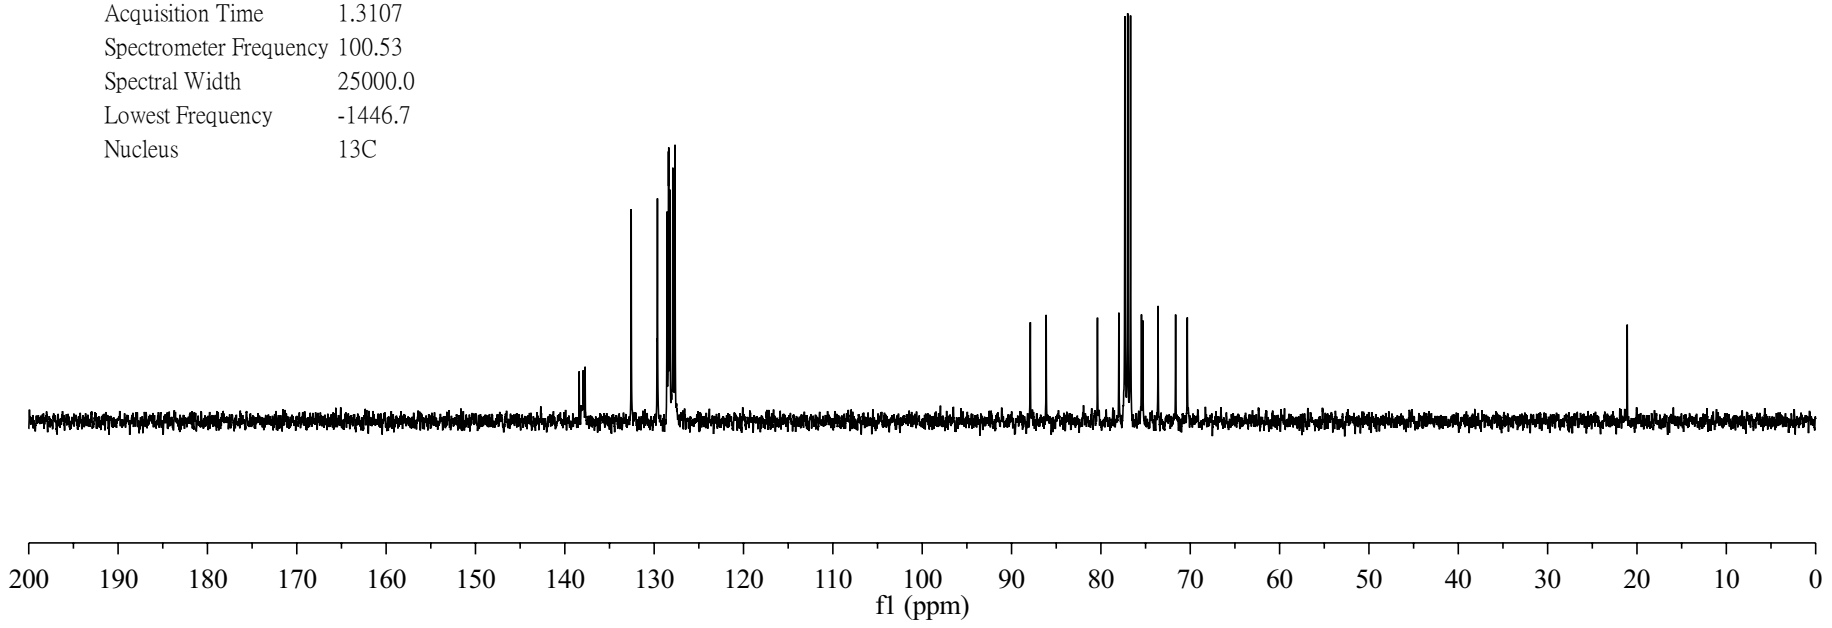

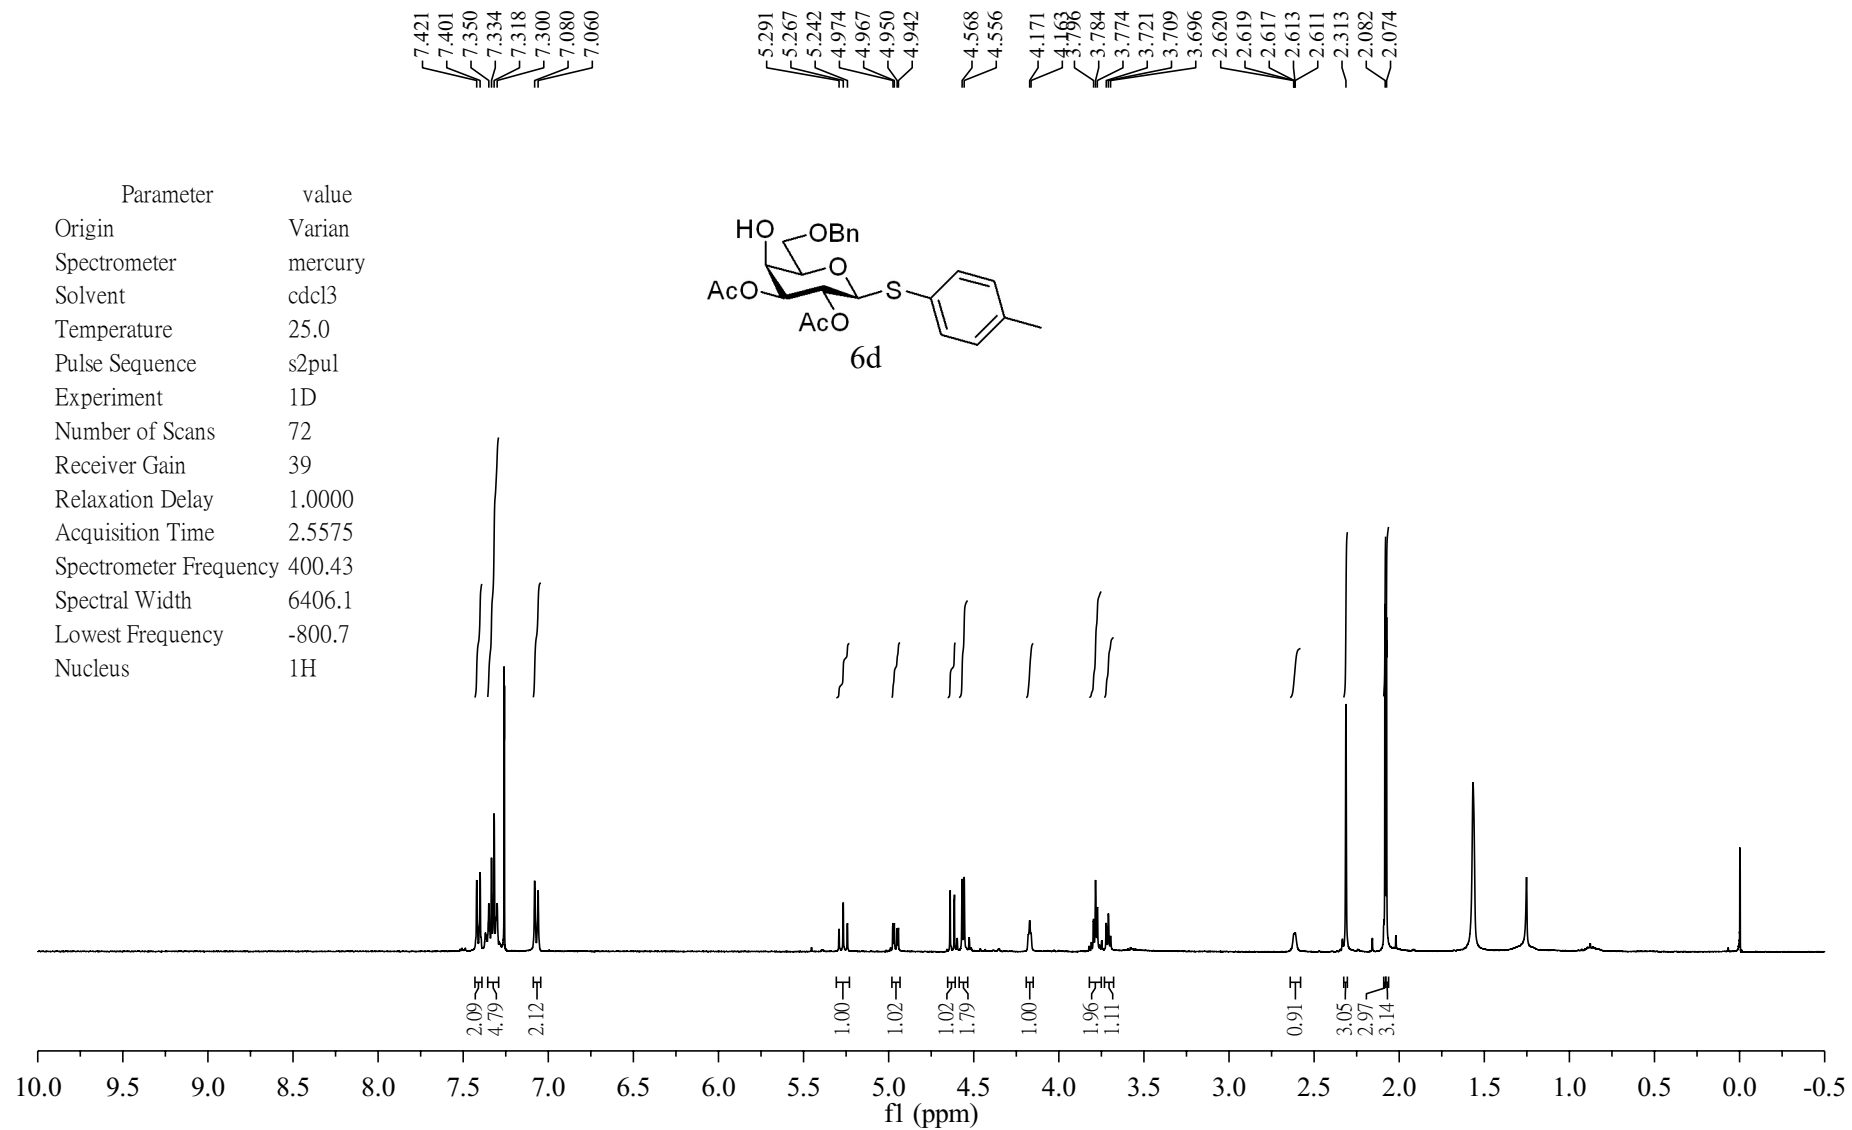

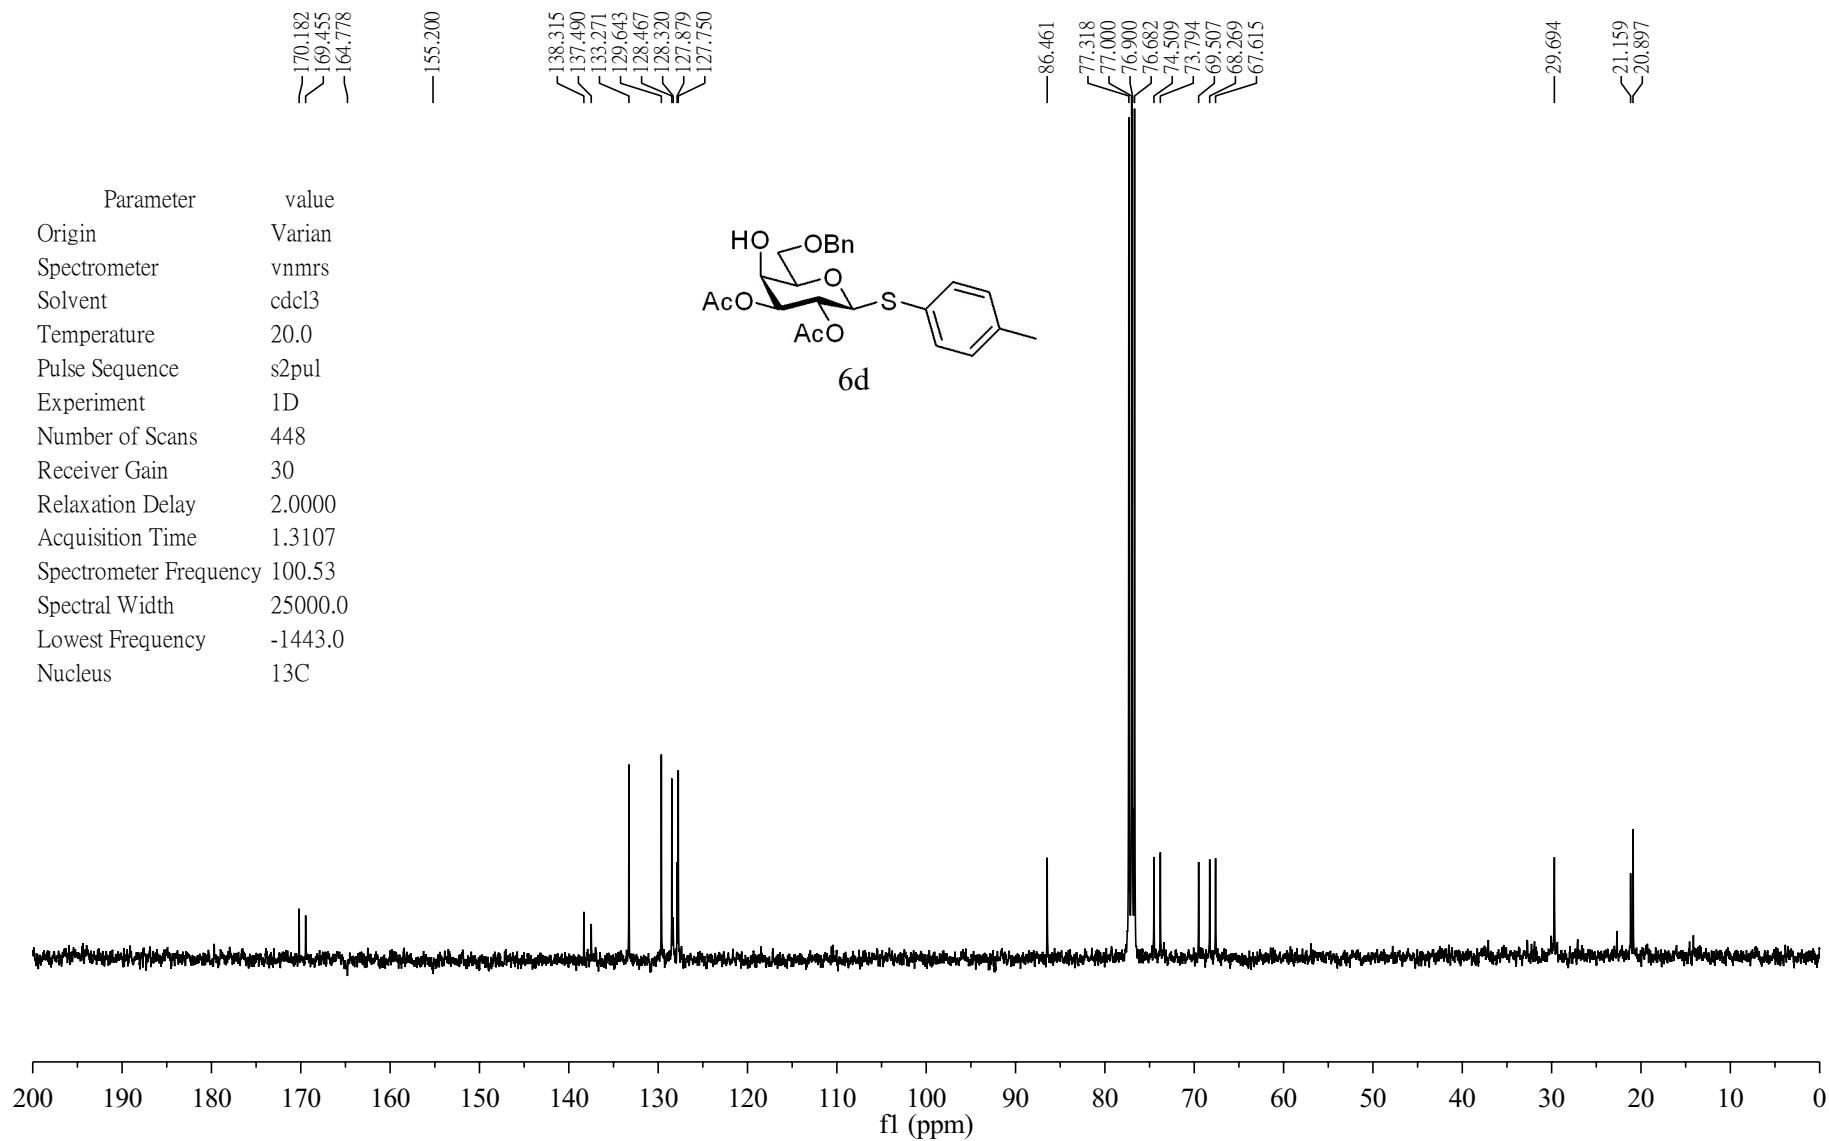

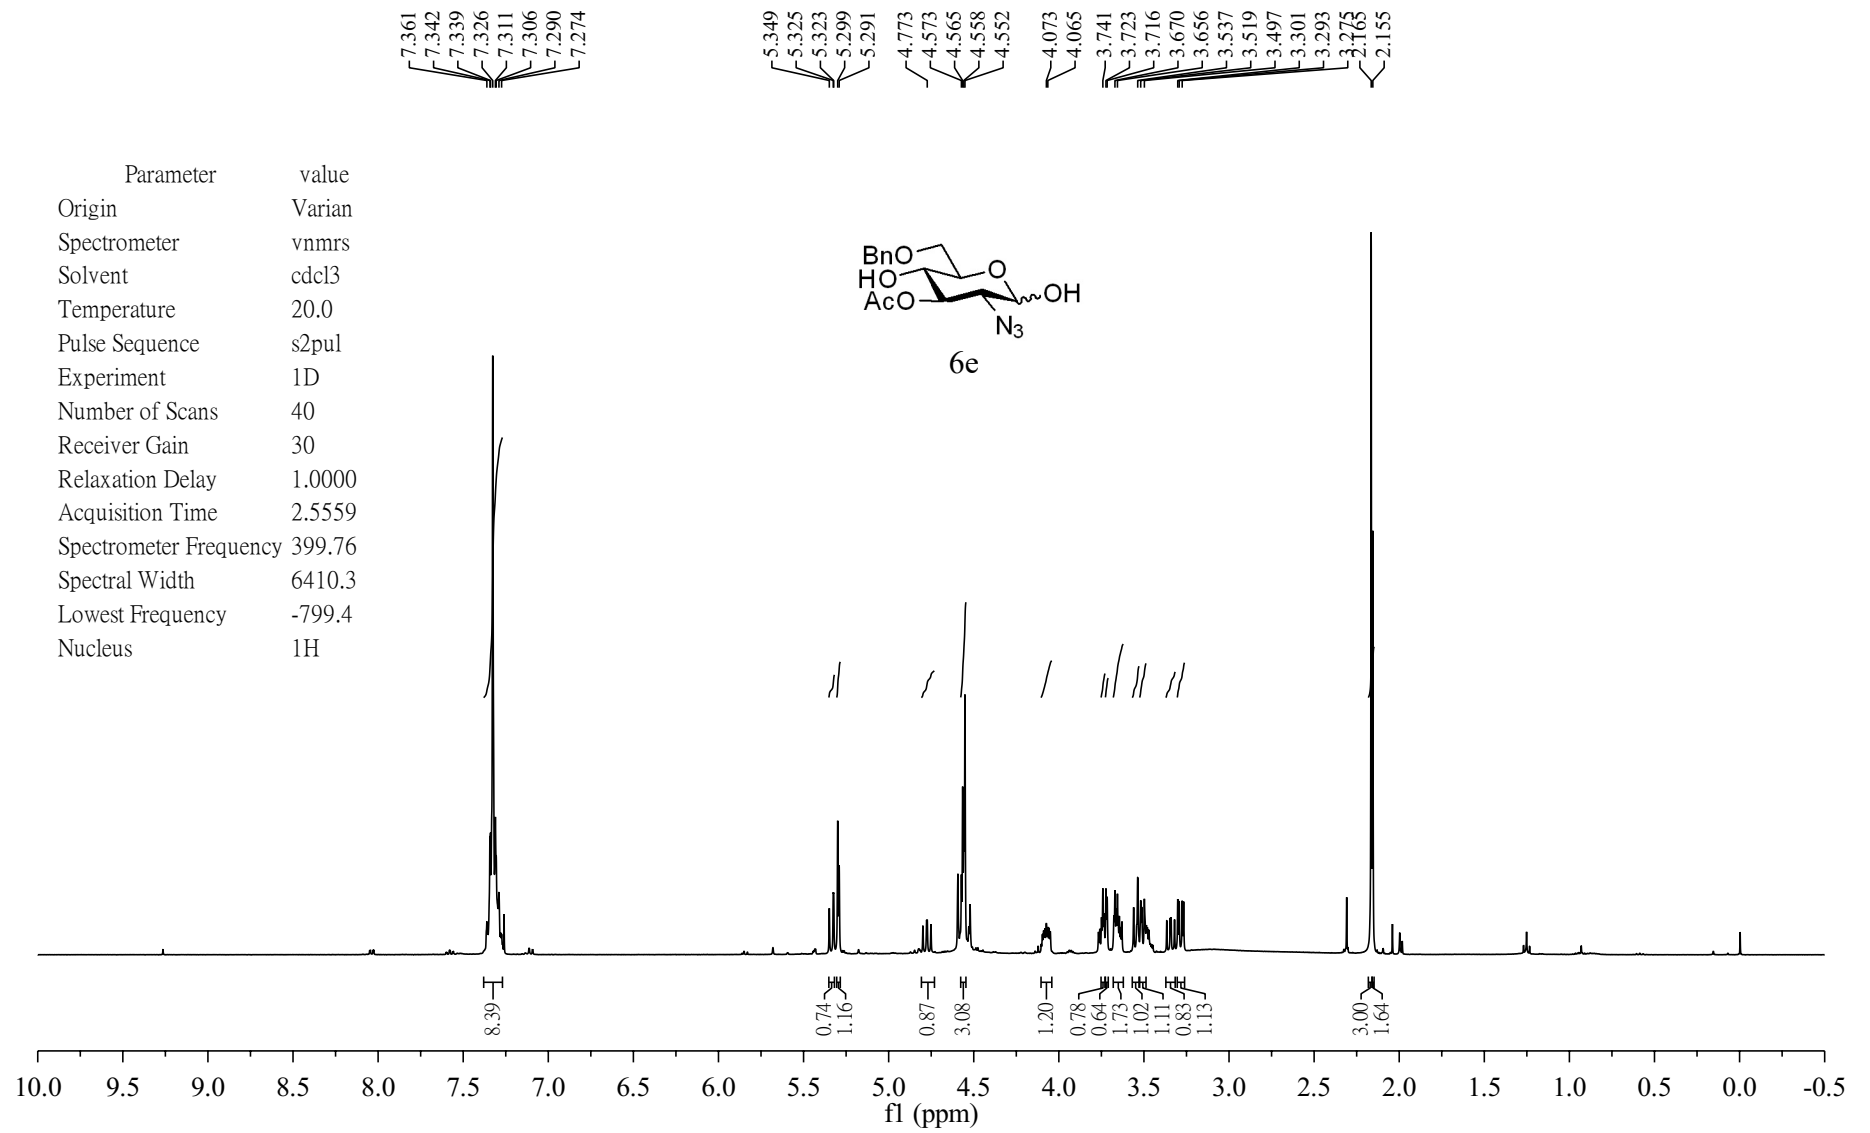



171.906  
171.784

137.300  
137.131  
128.485  
128.455  
127.976  
127.942

95.842  
91.841  
77.318  
77.000  
76.682  
74.512  
73.646  
73.601  
73.498  
70.418  
70.261  
70.013  
69.508  
61.376

20.953

| Parameter              | value   |
|------------------------|---------|
| Origin                 | Varian  |
| Spectrometer           | nmrs    |
| Solvent                | cdcl3   |
| Temperature            | 20.0    |
| Pulse Sequence         | s2pul   |
| Experiment             | 1D      |
| Number of Scans        | 208     |
| Receiver Gain          | 30      |
| Relaxation Delay       | 2.0000  |
| Acquisition Time       | 1.3107  |
| Spectrometer Frequency | 100.53  |
| Spectral Width         | 25000.0 |
| Lowest Frequency       | -1443.1 |
| Nucleus                | 13C     |

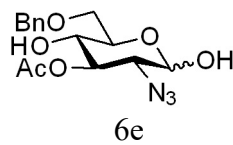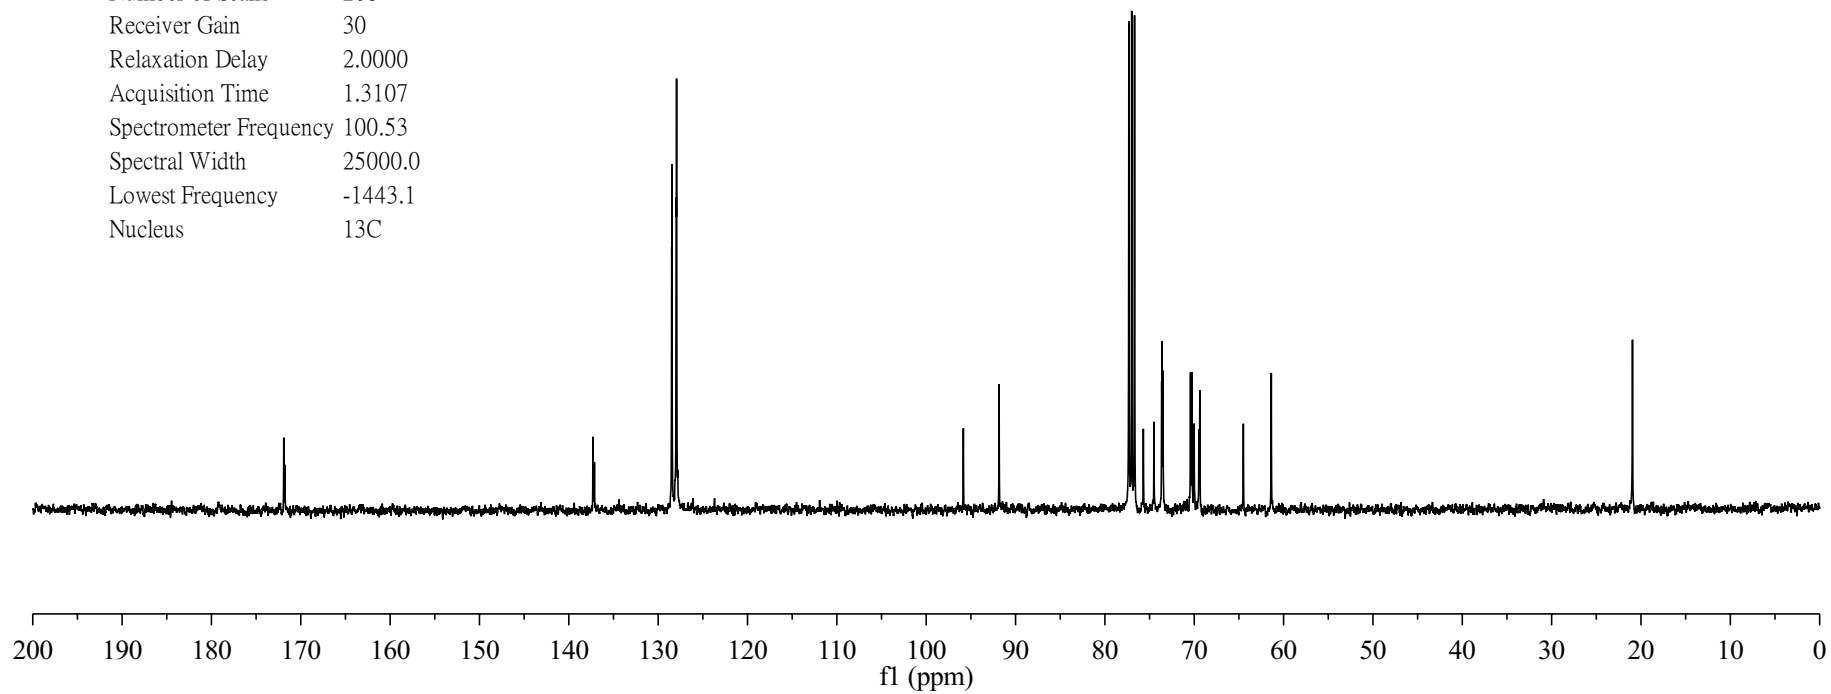

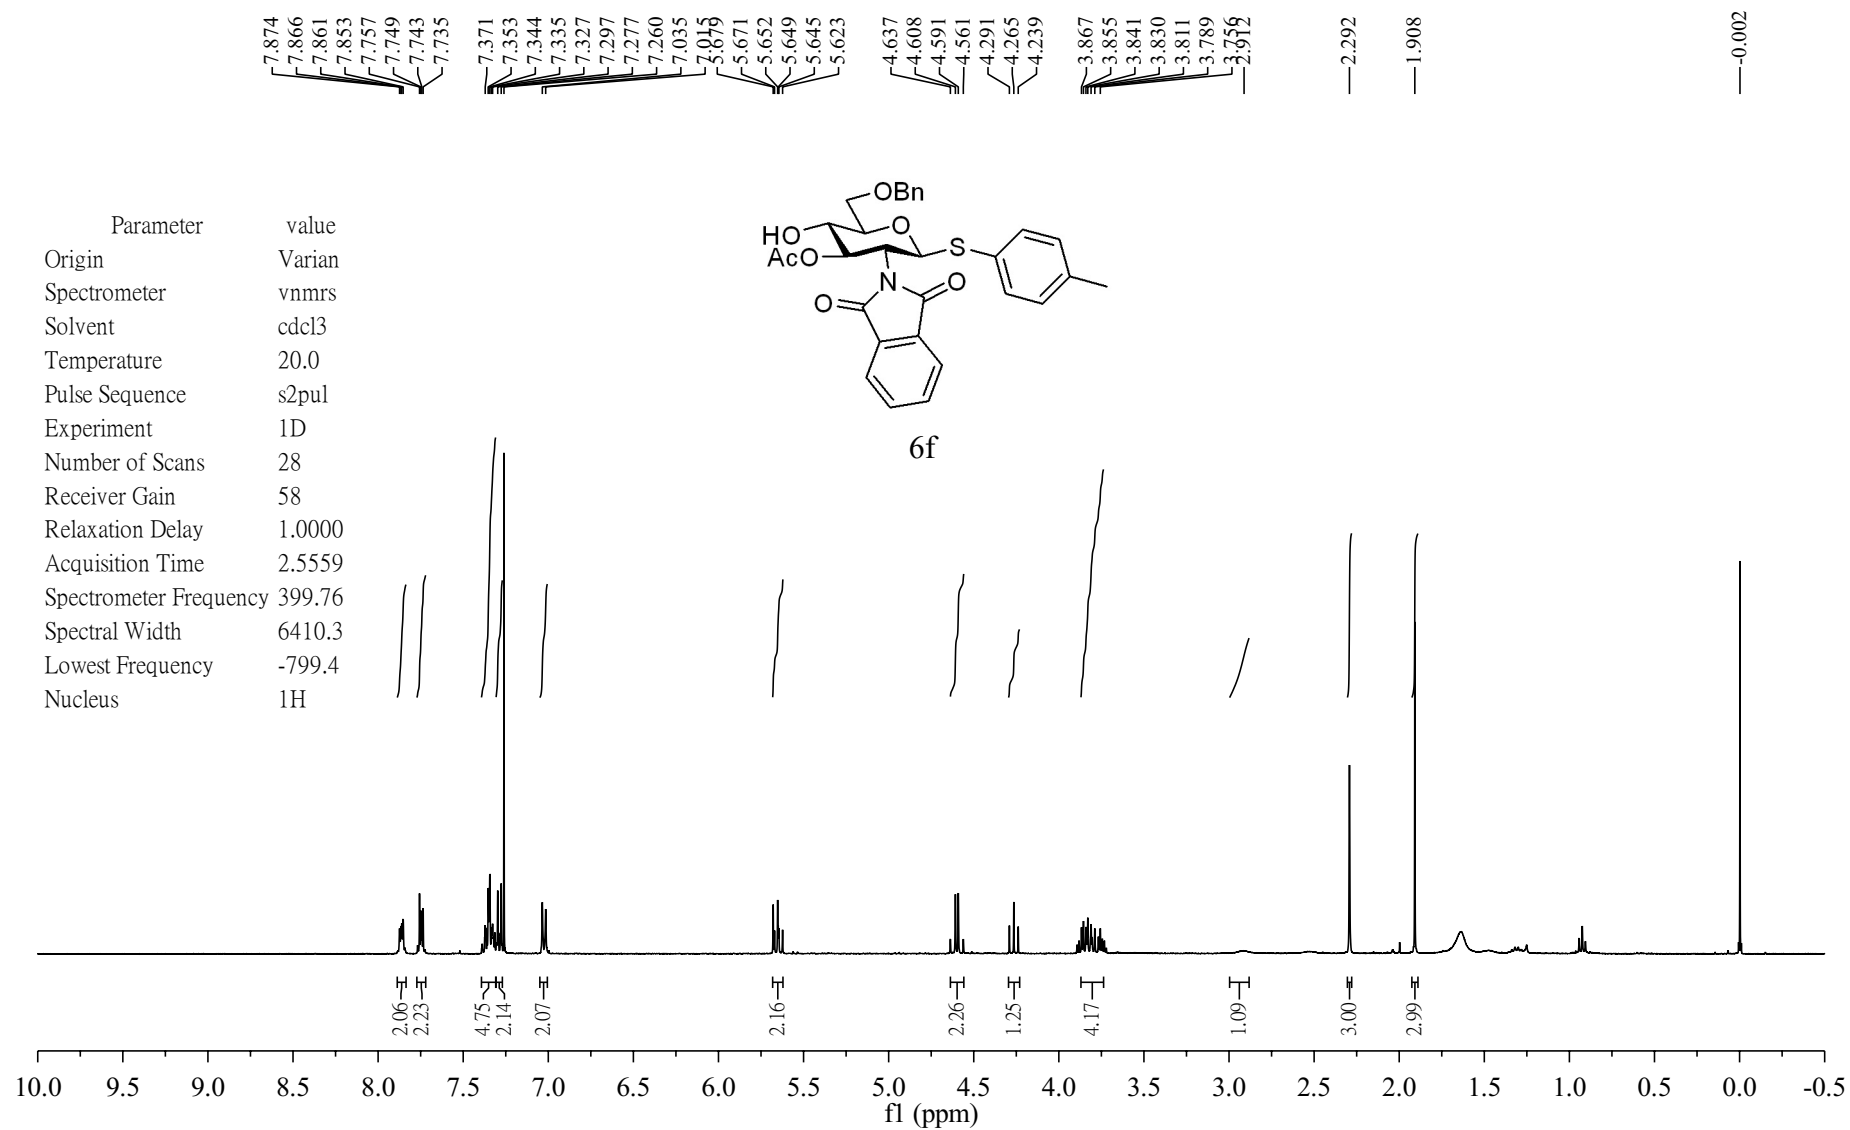

171.072  
167.824  
167.245

138.348  
137.681  
134.337  
134.143  
133.454  
131.588  
131.164  
129.603  
128.419  
127.790  
127.695  
127.506  
123.640  
123.539

83.179  
78.257  
77.312  
76.994  
76.676  
74.281  
73.687  
71.027  
70.179

53.585  
52.584

21.126  
20.646  
20.534  
13.902

| Parameter              | value   |
|------------------------|---------|
| Origin                 | Varian  |
| Spectrometer           | vnmrs   |
| Solvent                | cdcl3   |
| Temperature            | 20.0    |
| Pulse Sequence         | s2pul   |
| Experiment             | 1D      |
| Number of Scans        | 240     |
| Receiver Gain          | 30      |
| Relaxation Delay       | 2.0000  |
| Acquisition Time       | 1.3107  |
| Spectrometer Frequency | 100.53  |
| Spectral Width         | 25000.0 |
| Lowest Frequency       | -1445.5 |
| Nucleus                | 13C     |

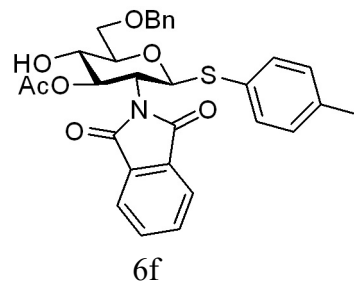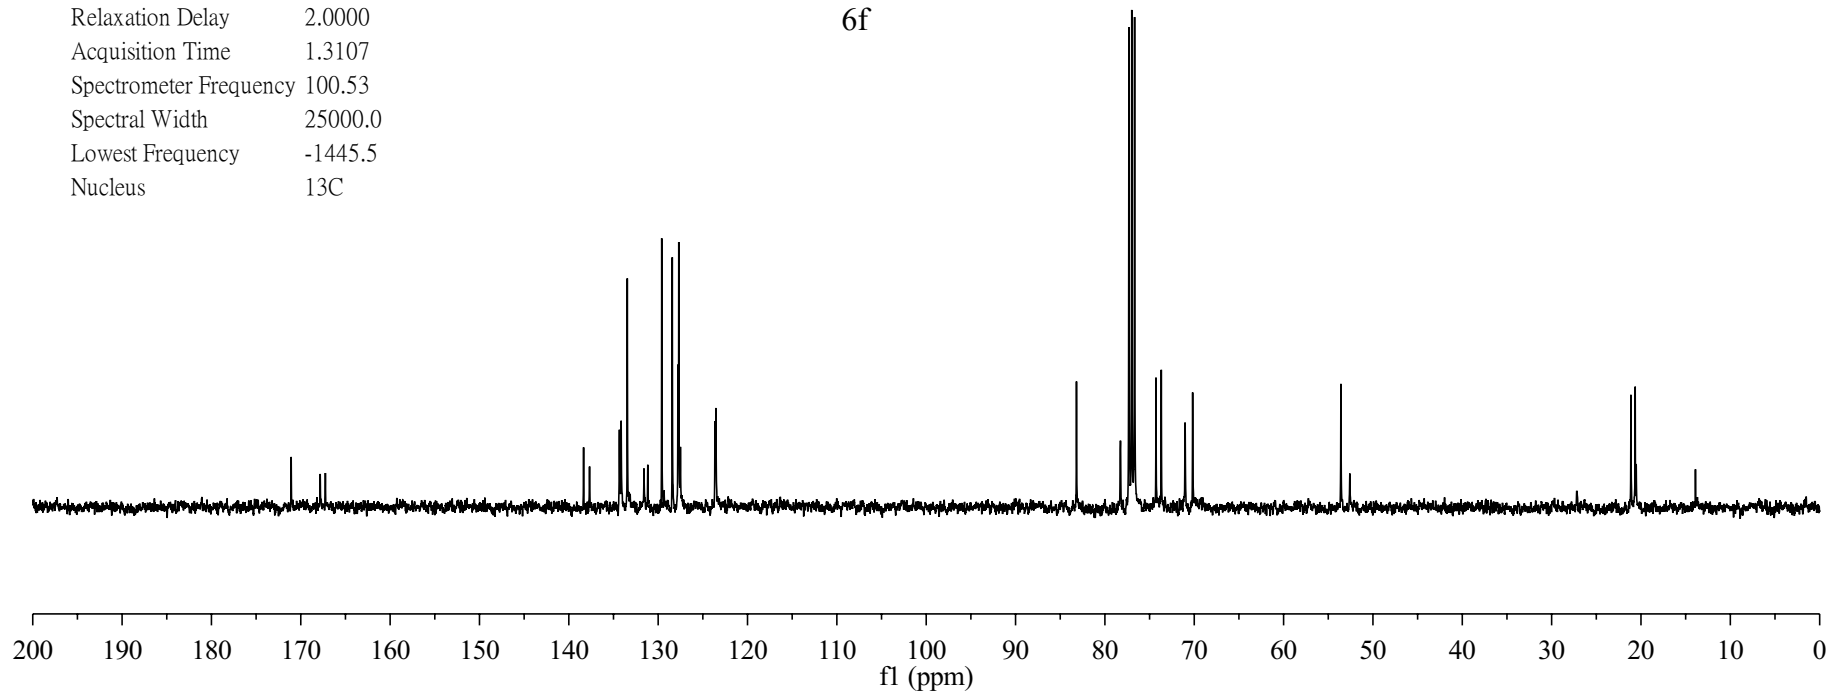

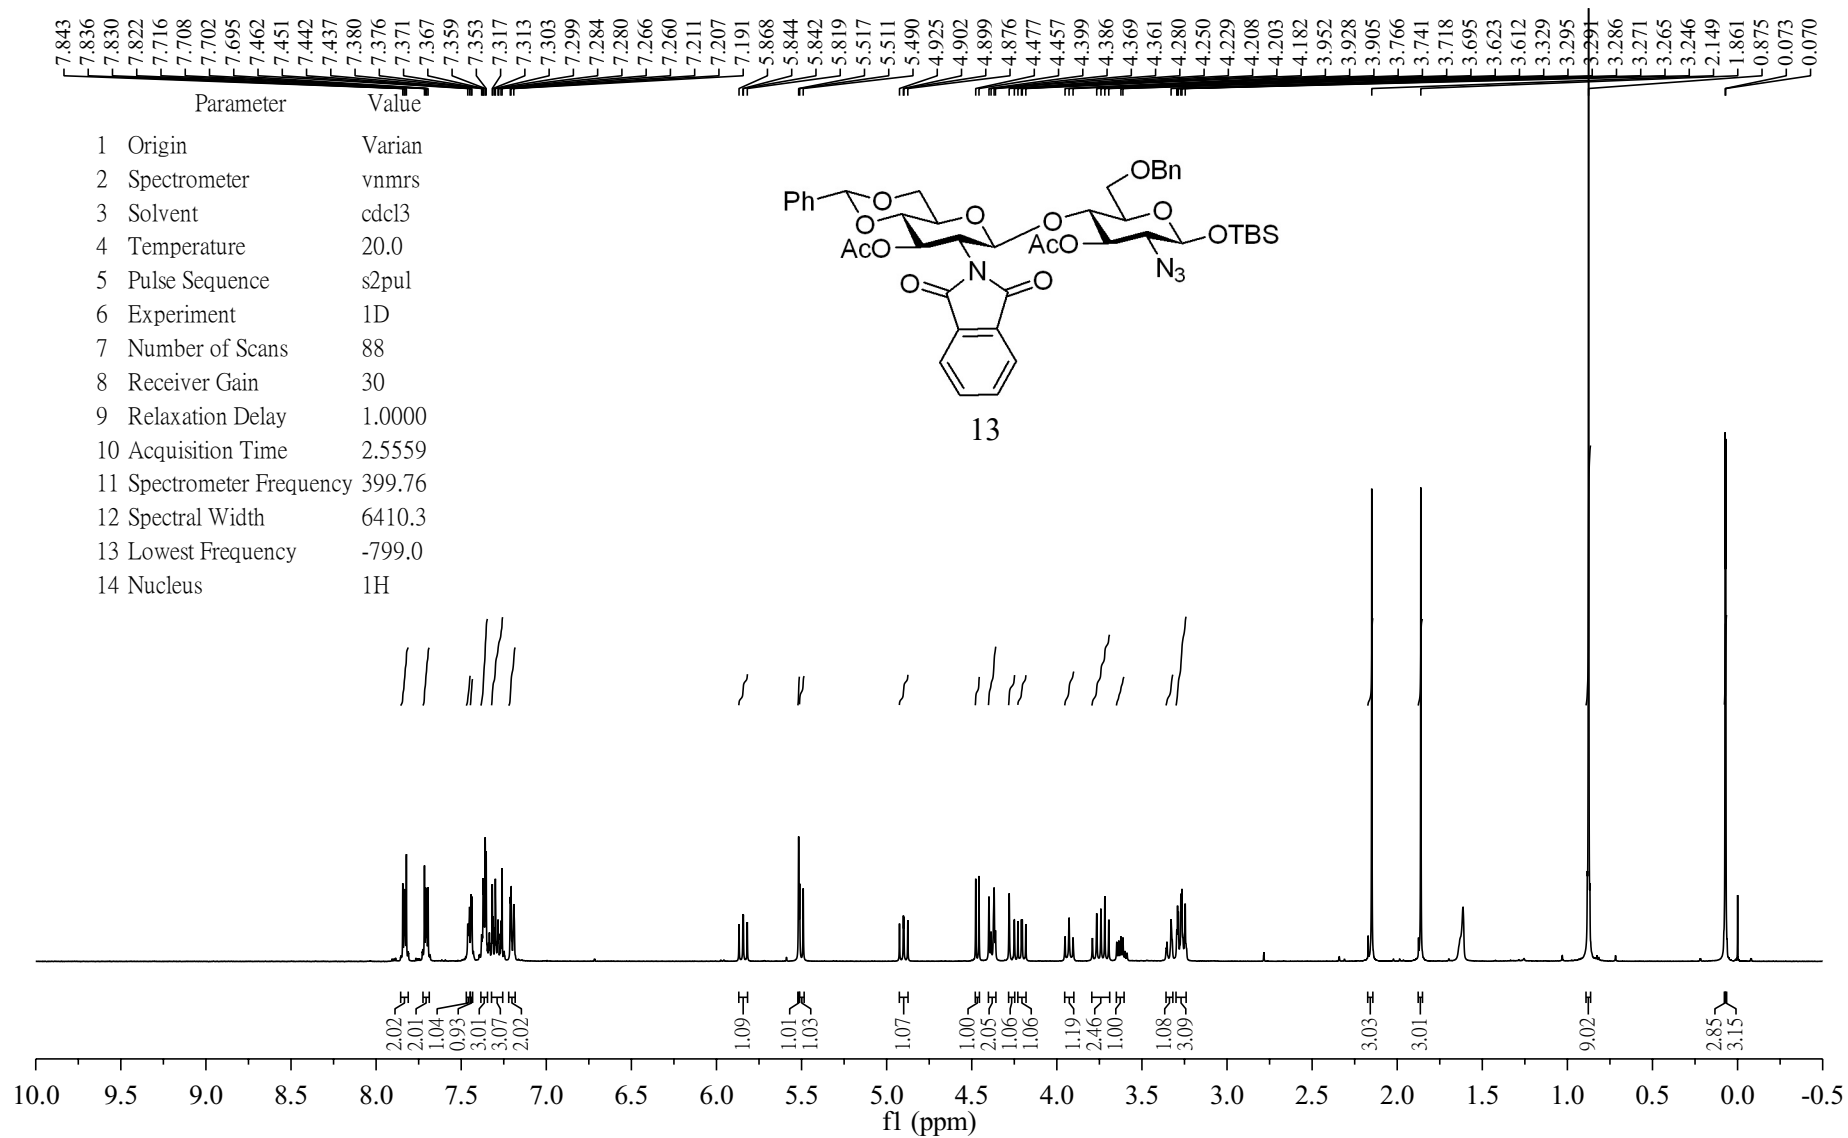

170.053  
169.232

137.787  
136.628  
134.247  
131.206  
129.096  
128.125  
127.395  
127.257  
126.095  
123.435

101.503  
98.156  
96.725  
78.840  
77.319  
77.000  
76.682  
74.583  
74.185  
72.683  
72.431  
69.514  
68.524  
67.258  
66.274  
65.795  
55.468

25.379  
21.142  
20.371  
17.762

4.580  
-5.386

Parameter Value

- 1 Origin Varian
- 2 Spectrometer vnmrs
- 3 Solvent cdcl3
- 4 Temperature 20.0
- 5 Pulse Sequence s2pul
- 6 Experiment 1D
- 7 Number of Scans 2016
- 8 Receiver Gain 30
- 9 Relaxation Delay 2.0000
- 10 Acquisition Time 1.3107
- 11 Spectrometer Frequency 100.53
- 12 Spectral Width 25000.0
- 13 Lowest Frequency -1441.8
- 14 Nucleus 13C

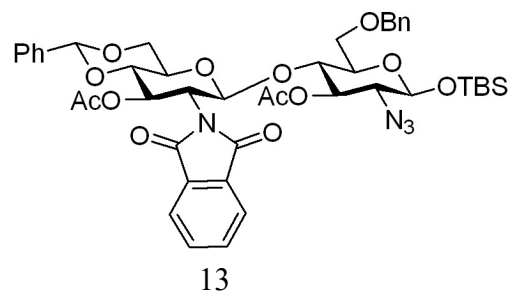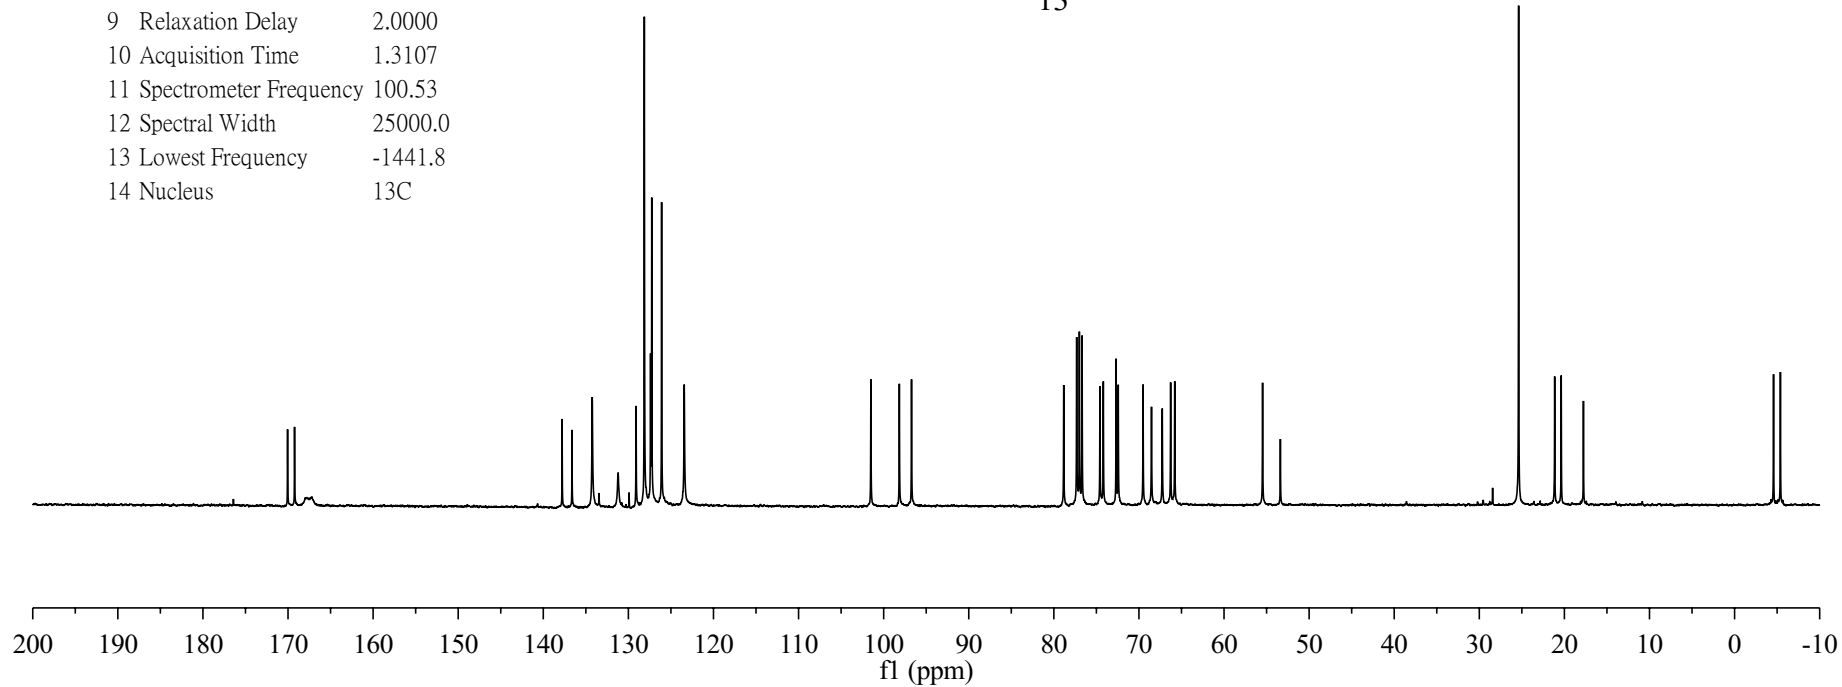

7.863  
7.848  
7.837  
7.815  
7.791  
7.755  
7.748  
7.739  
7.734  
7.727  
7.605  
7.598  
7.592  
7.585  
7.511  
7.503  
7.495  
7.486  
7.481  
7.459  
7.399  
7.388  
7.280  
7.257  
7.240  
7.040  
7.025  
5.896  
5.871  
5.847  
5.570  
5.545  
5.524  
5.020  
4.992  
4.882  
4.854  
4.622  
4.595  
4.489  
4.471  
4.413  
4.393  
4.367  
4.343  
4.316  
4.066  
4.041  
3.888  
3.863  
3.839  
3.818  
3.795  
3.770  
3.759  
3.746  
3.735  
3.723  
3.709  
3.697  
3.465  
3.441  
3.421  
3.393  
3.369  
3.349  
3.332  
3.314  
3.290

| Parameters                |        |
|---------------------------|--------|
| Parameter                 | Value  |
| 1 Origin                  | Varian |
| 2 Spectrometer            | nmrs   |
| 3 Solvent                 | cdcl3  |
| 4 Temperature             | 20.0   |
| 5 Pulse Sequence          | s2pul  |
| 6 Experiment              | 1D     |
| 7 Number of Scans         | 92     |
| 8 Receiver Gain           | 30     |
| 9 Relaxation Delay        | 1.0000 |
| 10 Acquisition Time       | 2.5559 |
| 11 Spectrometer Frequency | 399.76 |
| 12 Spectral Width         | 6410.3 |
| 13 Lowest Frequency       | -791.2 |
| 14 Nucleus                | 1H     |

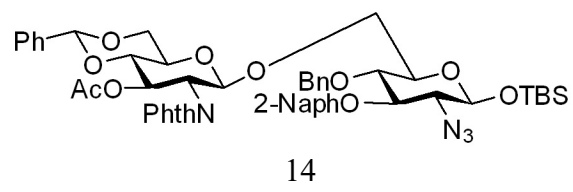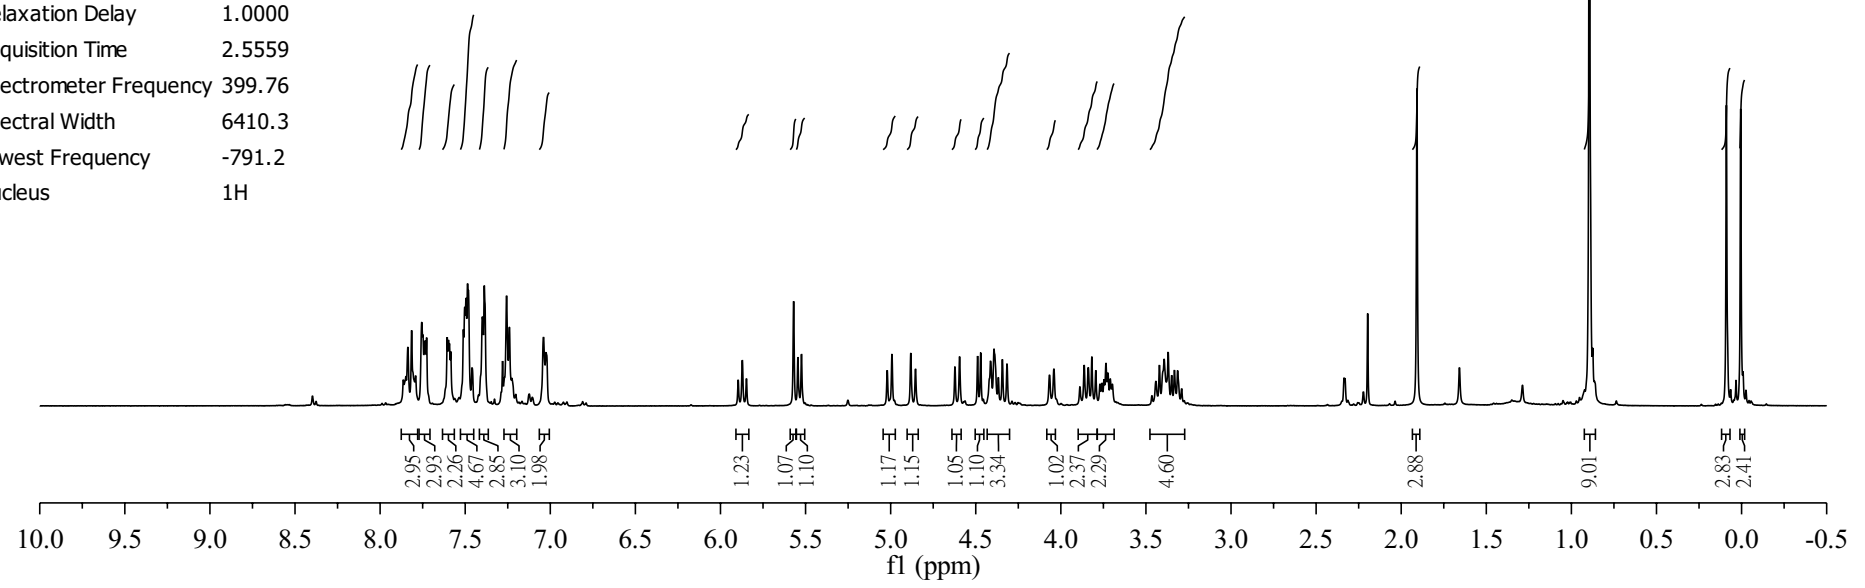

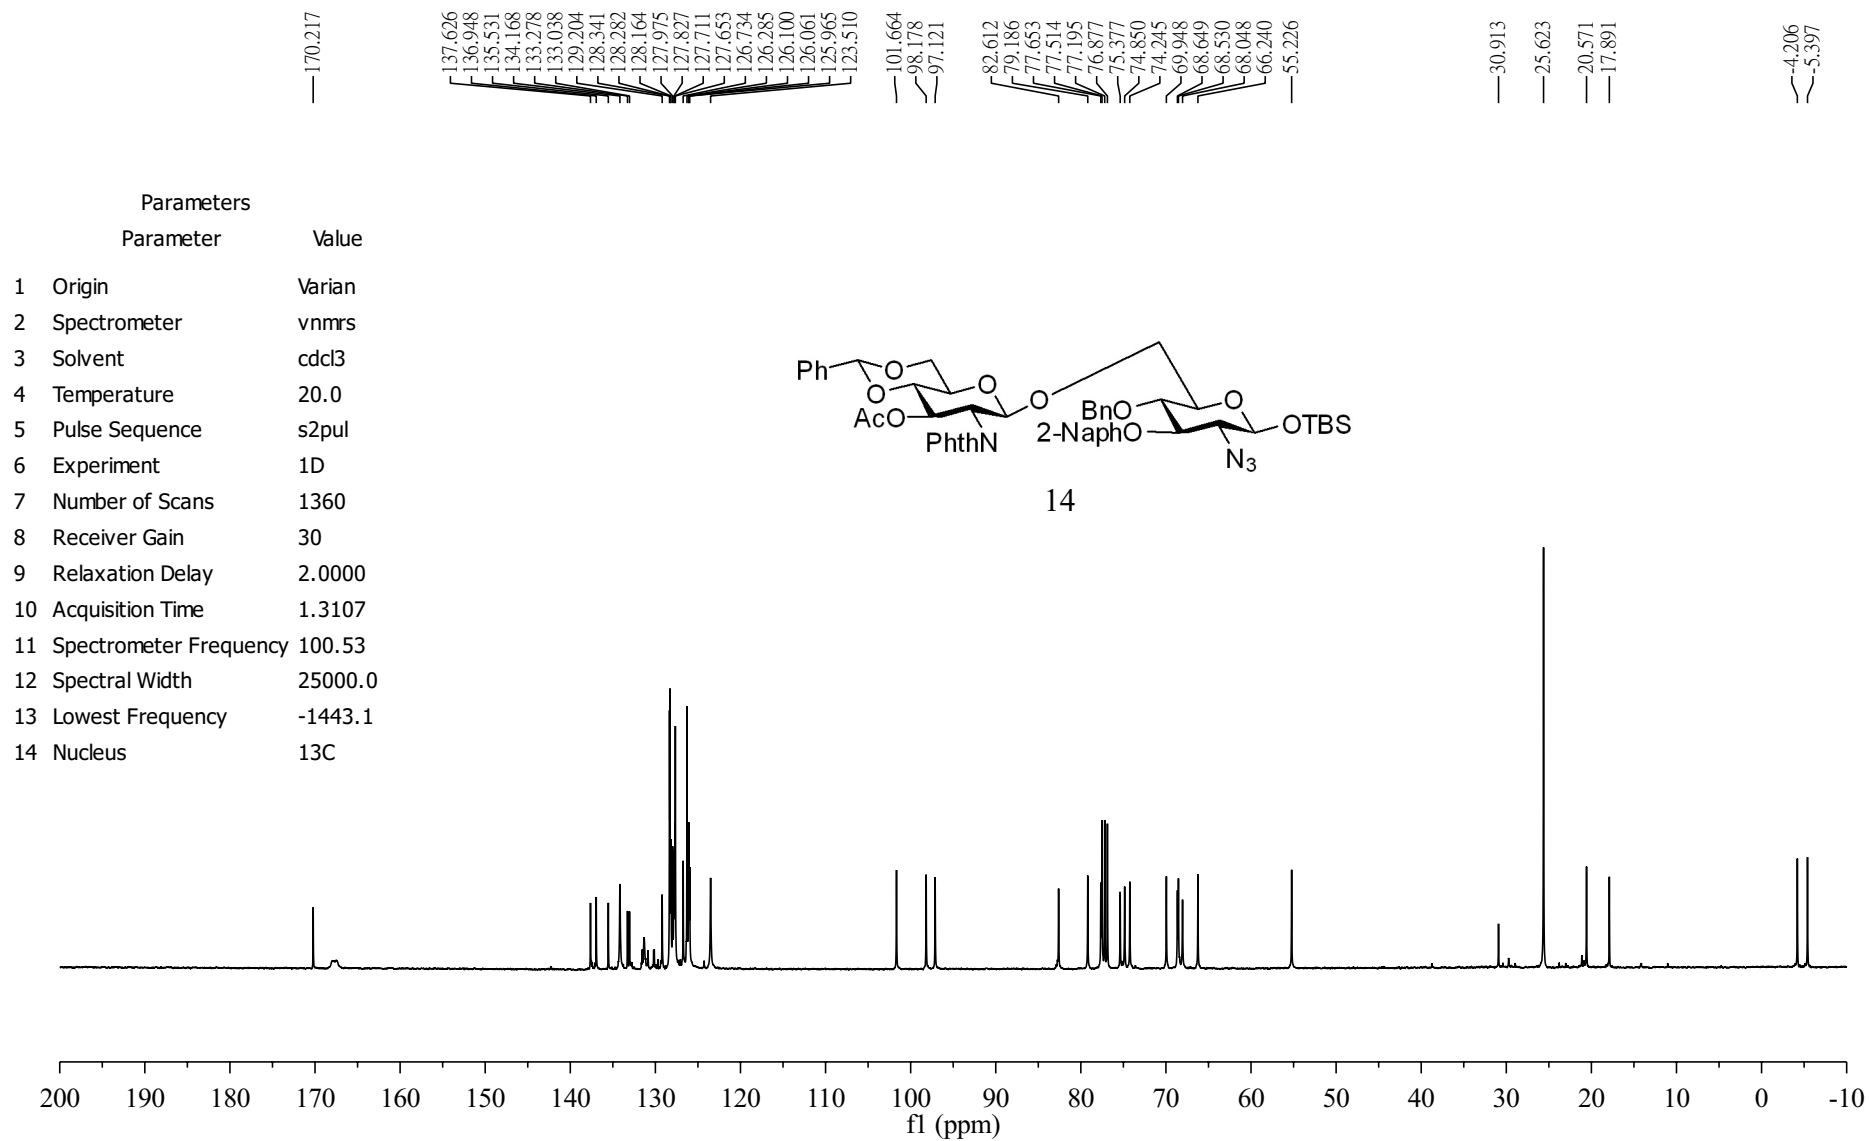

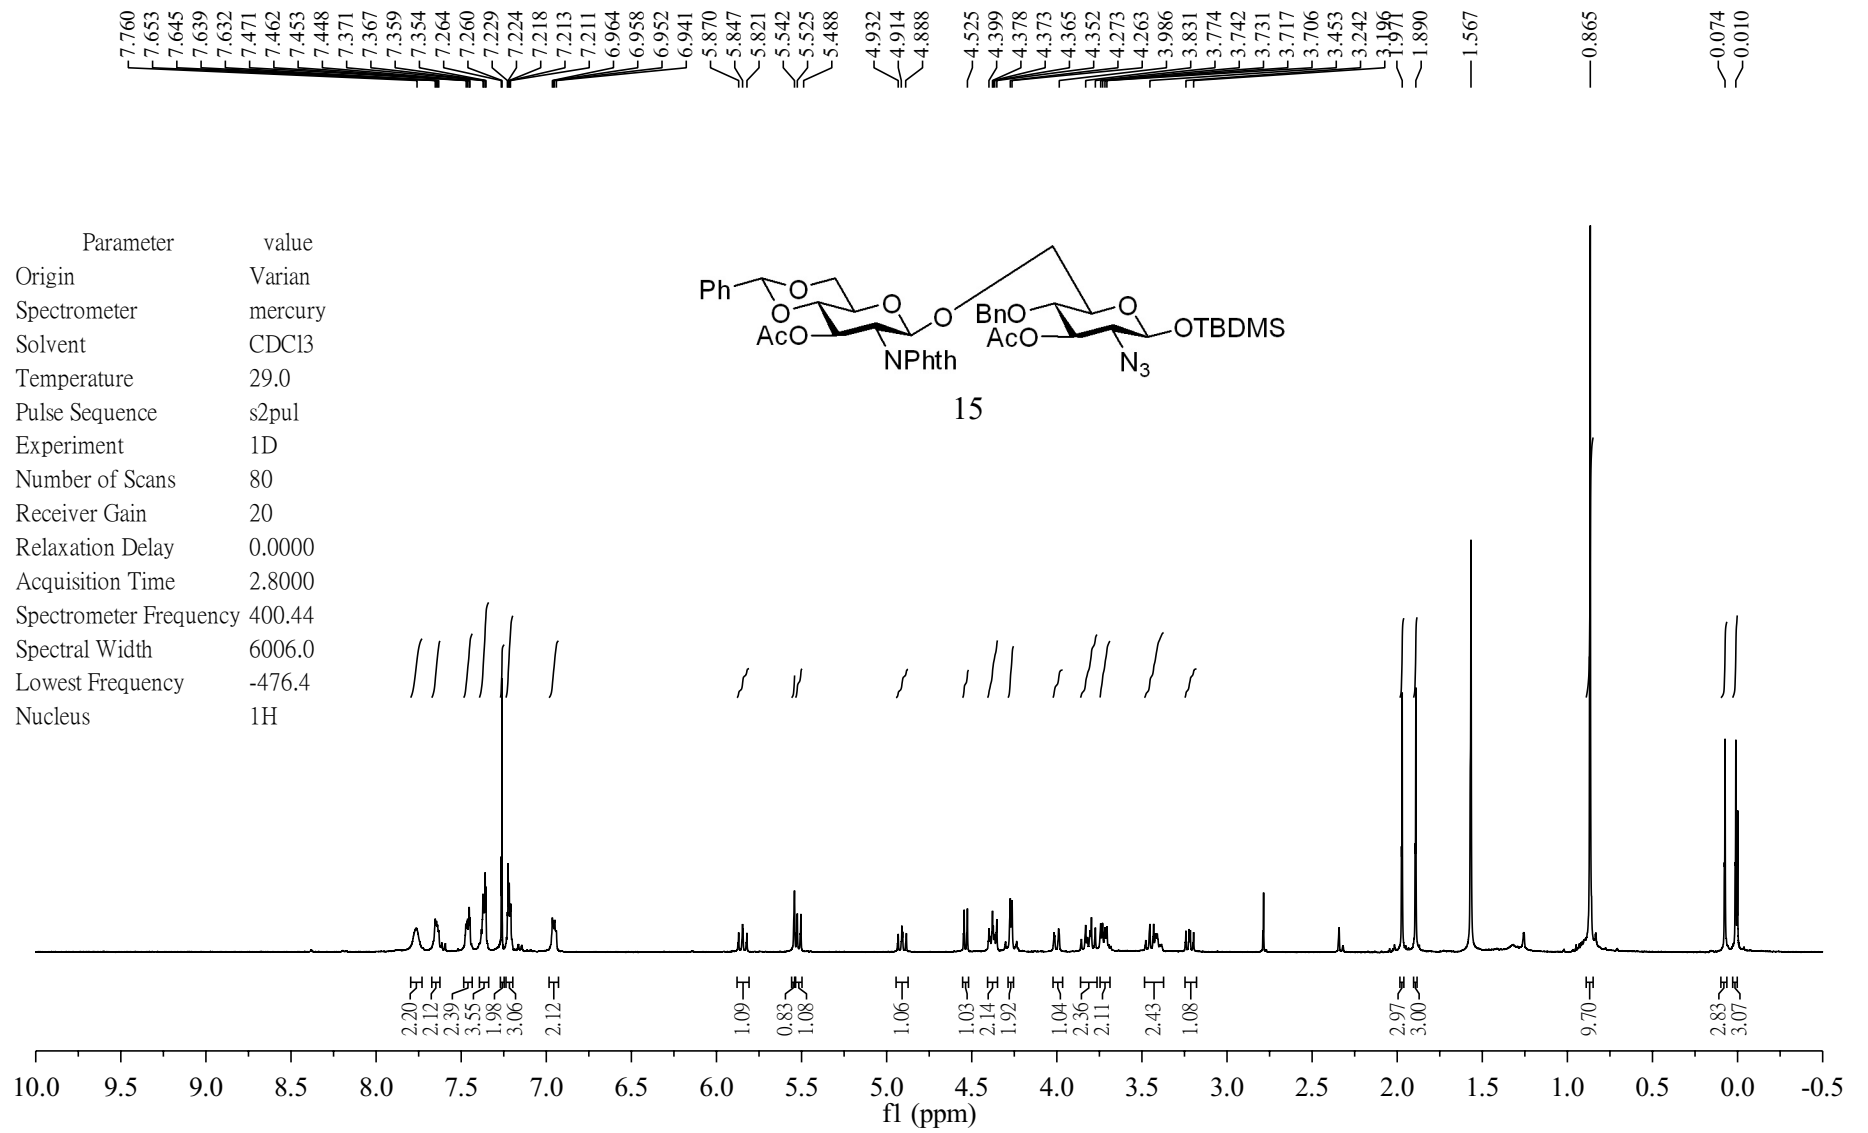



170.193  
169.711

137.124  
136.839  
134.202  
129.159  
128.307  
128.231  
127.839  
127.529  
126.204  
123.523

101.653  
98.190  
97.023

79.118  
77.311  
76.993  
76.675  
76.057  
74.379  
74.072  
73.580  
69.785  
68.602  
67.847  
66.312  
66.231  
55.198

25.498  
20.834  
20.535  
17.741

| Parameter              | value   |
|------------------------|---------|
| Origin                 | Varian  |
| Spectrometer           | nmrs    |
| Solvent                | cdcl3   |
| Temperature            | 20.0    |
| Pulse Sequence         | s2pul   |
| Experiment             | 1D      |
| Number of Scans        | 612     |
| Receiver Gain          | 30      |
| Relaxation Delay       | 2.0000  |
| Acquisition Time       | 1.3107  |
| Spectrometer Frequency | 100.53  |
| Spectral Width         | 25000.0 |
| Lowest Frequency       | -1443.2 |
| Nucleus                | 13C     |

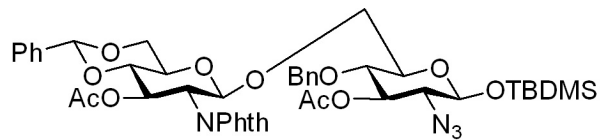

15

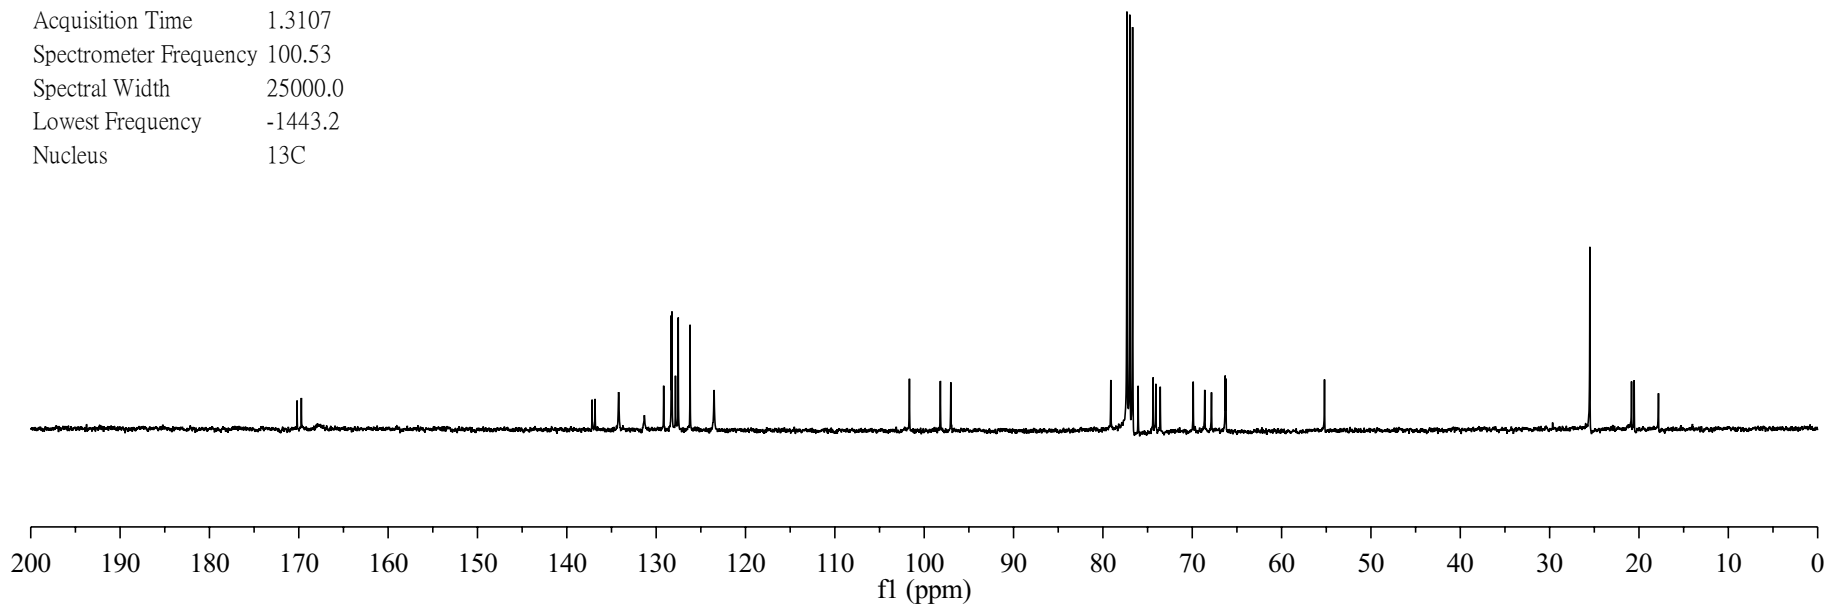

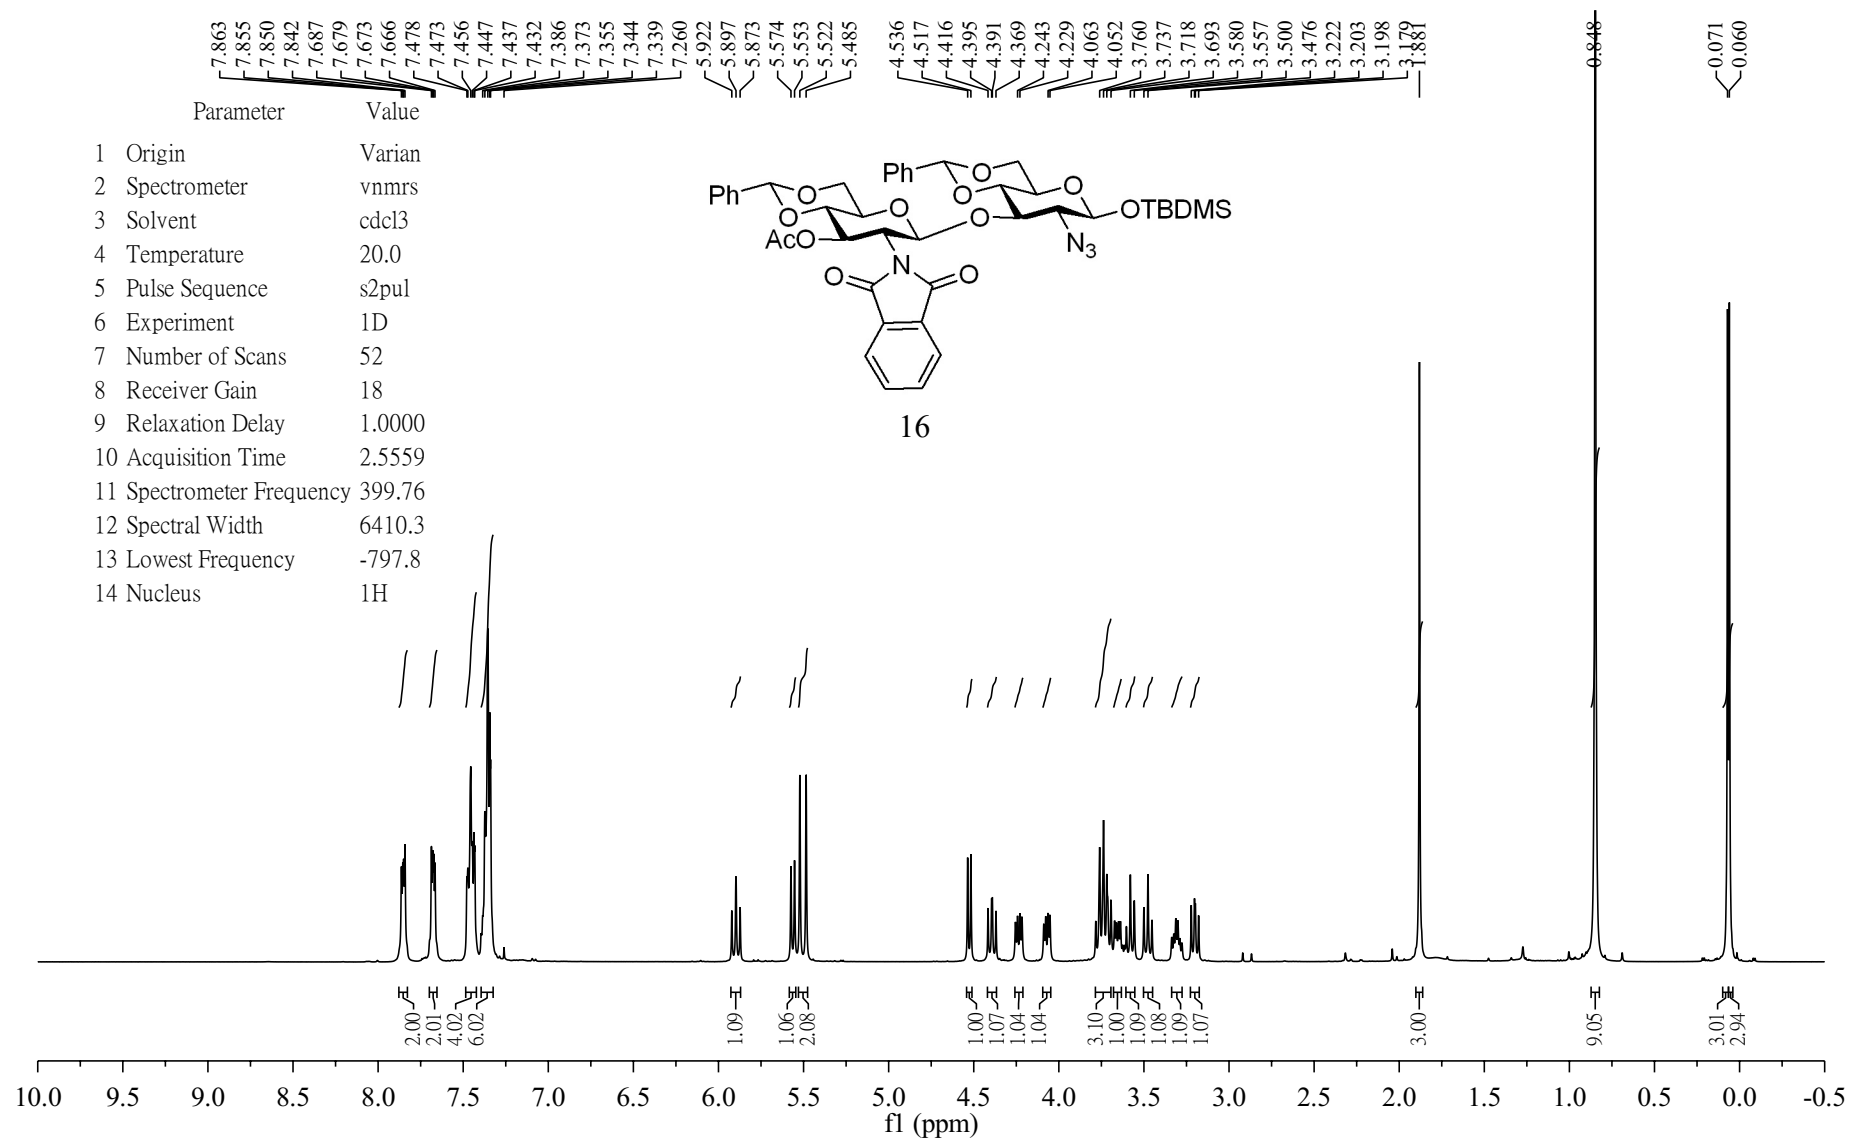

| Parameter                 | Value           |
|---------------------------|-----------------|
| 1 Origin                  | Varian          |
| 2 Spectrometer            | vmrs            |
| 3 Solvent                 | cdcl3           |
| 4 Temperature             | 20.0            |
| 5 Pulse Sequence          | s2pul           |
| 6 Experiment              | 1D              |
| 7 Number of Scans         | 440             |
| 8 Receiver Gain           | 30              |
| 9 Relaxation Delay        | 2.0000          |
| 10 Acquisition Time       | 1.3107          |
| 11 Spectrometer Frequency | 100.53          |
| 12 Spectral Width         | 25000.0         |
| 13 Lowest Frequency       | -1454.3         |
| 14 Nucleus                | <sup>13</sup> C |

170.010

136.930  
136.779  
134.084  
131.249  
129.037  
128.111  
128.014  
126.161  
125.868  
123.359

101.478  
101.080  
99.821  
97.680  
80.614  
79.012  
78.865  
77.318  
77.000  
76.681  
69.679  
68.459  
68.228  
67.411  
66.340  
66.040  
55.374

25.361  
20.460  
17.655

-4.543  
-5.324

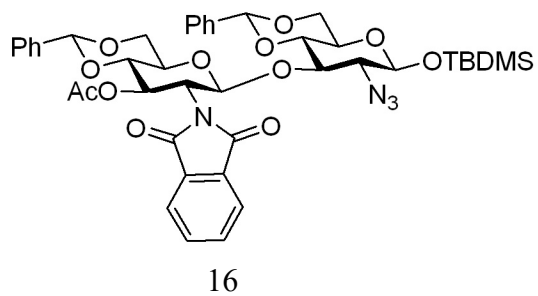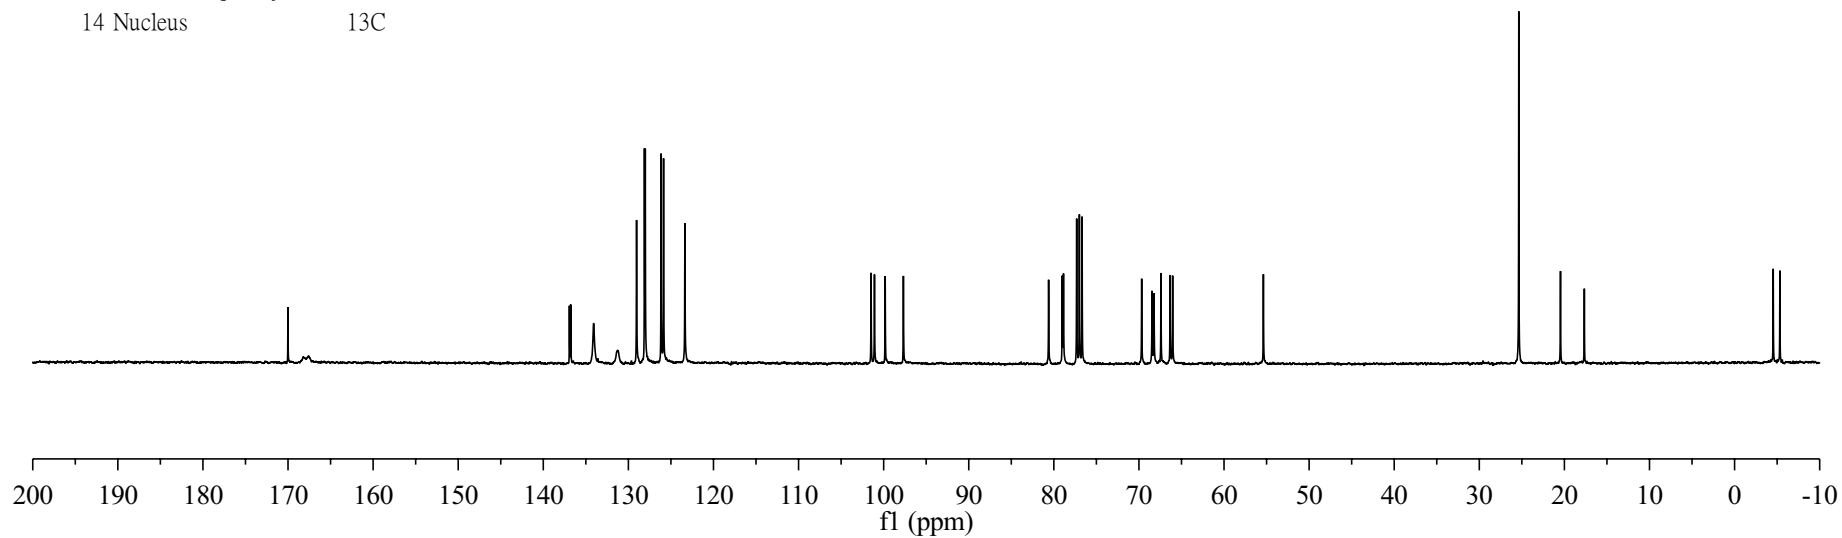

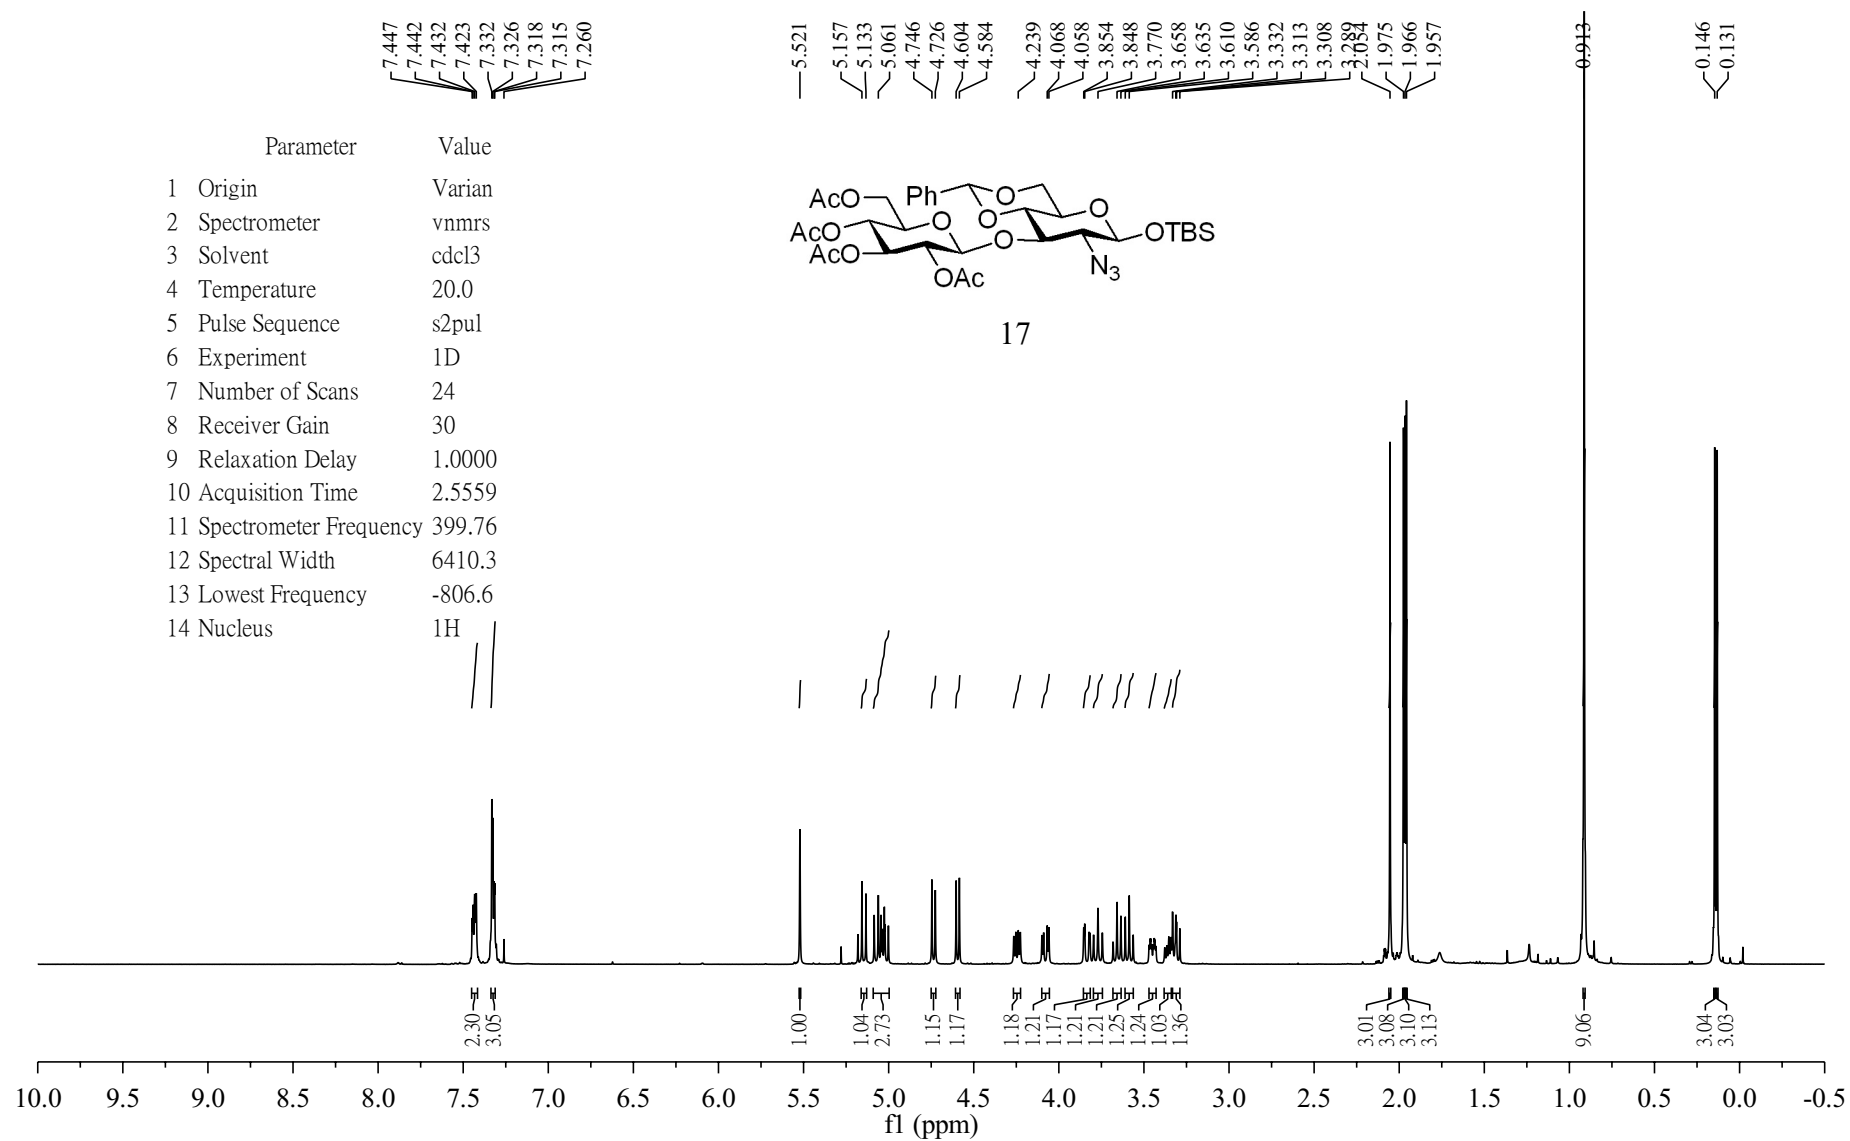

170.539  
170.199  
169.299  
169.194

136.919  
129.100  
128.079  
125.875

101.215  
100.950  
97.520

79.418  
79.123  
77.318  
77.000  
76.681  
72.694  
71.645  
71.397  
68.382  
68.346  
67.868  
66.356  
61.434

25.391  
20.563  
20.492  
20.460  
17.752

-4.466  
-5.335

| Parameter                 | Value           |
|---------------------------|-----------------|
| 1 Origin                  | Varian          |
| 2 Spectrometer            | vnmrs           |
| 3 Solvent                 | cdcl3           |
| 4 Temperature             | 20.0            |
| 5 Pulse Sequence          | s2pul           |
| 6 Experiment              | 1D              |
| 7 Number of Scans         | 2408            |
| 8 Receiver Gain           | 30              |
| 9 Relaxation Delay        | 2.0000          |
| 10 Acquisition Time       | 1.3107          |
| 11 Spectrometer Frequency | 100.53          |
| 12 Spectral Width         | 25000.0         |
| 13 Lowest Frequency       | -1451.3         |
| 14 Nucleus                | <sup>13</sup> C |

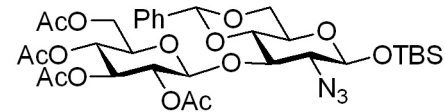

17

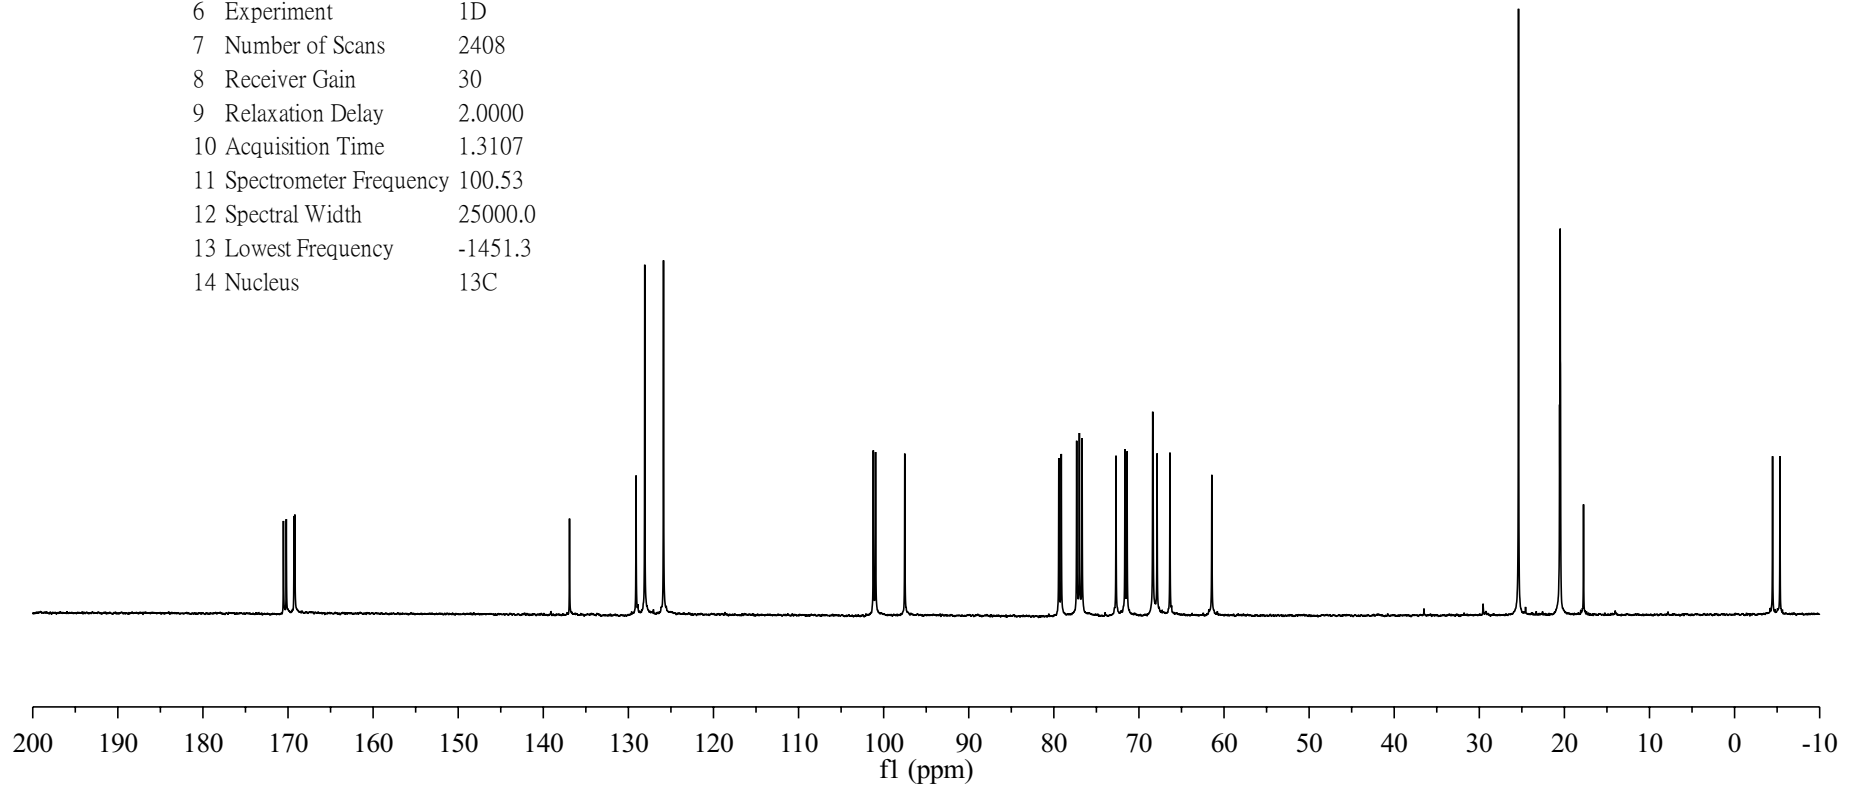

Supplement: RA-009-C9RA06170C-s001.pdf [file RA-009-C9RA06170C-s001.pdf]
